# Supplementary material for: Reprogramme the E. coli metabolism by engineering a functional carbon-fixation pathway
Source: J Biol Eng. 2025 Dec 29;20:21. doi: 10.1186/s13036-025-00612-x (PMC12859837; doi:10.1186/s13036-025-00612-x)
Supplement: Supplementary file 1 — Supplementary Material 1 [file 13036_2025_612_MOESM1_ESM.xlsx]

## Sheet: GC-MS results
Supplementary file 1: GC-MS results of the detected intensity of every feature (metabolites) for each sample. The metabolite name include some nonbiological chemicals, repeated metabolites, and low-intensity signals, which have been removed during the curation steps and have not proceeded to the subsequent analysis.
				File type	Sample	Sample	Sample	Sample	Sample	Sample	Sample	Sample	Sample	Sample	Sample	Sample	Sample	Sample	Sample	Sample	Sample	Sample	Sample	Sample	Sample	Sample	Sample	Sample	Sample	Sample	Sample	Sample	Sample	Sample	Sample	Sample	Sample	Sample	Sample	Sample	Sample	Sample	Sample	Sample	Sample	Sample	Sample	Sample	Sample
				Injection order	18	12	24	40	42	26	31	28	13	41	35	10	19	34	25	44	37	36	9	11	32	16	29	21	22	30	23	17	20	19	26	15	24	28	41	7	17	34	38	16	21	30	23	8	32
				Batch ID	1	1	1	1	1	1	1	1	1	1	1	1	1	1	1	1	1	1	1	1	1	1	1	1	1	1	1	1	2	2	2	2	2	2	2	2	2	2	2	2	2	2	2	2	2
				Sample Name	BL:VbT1-1	BL:VbT1-2	BL:VbT1-3	BL:Veb-2	BL:VbT2-5	BL:VbT2-7	BL:VbTb-7	BL:VeTs-3	BL:Veb-4	BL:VeTs-6	BL:VeTs-7	BL:CpT1-2	BL:CpT1-3	BL:CpT1-5	BL:CpT2-5	BL:CpTb-3	BL:CpTb-4	BL:CpTb-7	BL:CpTs-1	BL:CpTs-2	BL:CpTs-3	BL:CpTs-6	EQ-4	EQ-5	CQ1	CQ4	CQ5	CQ6	BL:Veb-1	BL:CpVe-4	BL:CpVe-7	BL:VbT1-4	BL:VbT1-5	BL:VbT1-6	BL:VbT2-4	BL:VbTb-1	BL:Veb-3	BL:VbTb-6	BL:VeTs-2	BL:VeTs-4	BL:CpT1-1	BL:CpT1-4	BL:Veb-5	BL:CpT2-1	BL:CpT2-3
Alignment ID	Metabolite name	Fill %	S/N average	EI spectrum	270523-15	270523-16	270523-17	270523-2	270523-26	270523-28	270523-35	270523-38	270523-4	270523-41	270523-42	270523-44	270523-45	270523-47	270523-54	270523-59	270523-60	270523-63	270523-64	270523-65	270523-66	270523-69	270523-BQ4	270523-BQ5	270523-CQ1	270523-CQ4	270523-CQ5	270523-CQ6	280523-1	280523-11	280523-14	280523-18	280523-19	280523-20	280523-25	280523-29	280523-3	280523-34	280523-37	280523-39	280523-43	280523-46	280523-5	280523-50	280523-52
18	Unknown	0.4	17.81	42.9995:2590 43.99436:6273 44.00696:447 44.97858:3137 45.01492:7324 45.97845:792 46.01017:3090 46.01376:888 47.01183:546 47.99441:500 50.0146:564 51.0097:611 51.02209:1248 52.01707:392 52.03023:1864 53.03345:416 54.99968:388 58.06463:441 58.99408:2032 59.03043:1090 60.00146:916 61.00938:1114 61.02705:1167 69.95516:611 70.00819:530 70.02238:937 71.94804:854 72.03806:719 76.0256:1411 78.03278:475 7…	414992	610122	380202	323244	380302	414112	419187	437488	416968	360098	470292	488255	481220	440302	350668	370174	738797	469239	290663	421424	486031	402780	416798	482505	615708	514435	434452	385382	280836	456246	417876	408240	429315	499870	427447	468798	416335	413763	356074	480275	503653	406174	240331	455495	548024
63	Unknown	0.904	194.47	40.98434:85 41.99097:718 42.04686:301 42.99928:7281 43.04132:1004 43.05468:130 43.98844:1811 44.00734:2119 44.04752:227 44.97861:11837 45.01498:26466 45.12582:95 45.19512:99 45.28191:52 45.30401:78 45.98513:1512 46.0144:1605 46.99432:9914 47.01174:1068 47.04618:97 47.966:262 48.00047:3944 48.07534:56 49.00714:301 51.97591:103 52.98365:1063 53.98305:200 54.04646:178 54.99891:2212 55.05285:234 55.9…	54617.2	80213.2	35952.6	23499.7	30376.9	52077.7	44950.6	52539.8	47947.1	29824.3	65030.4	53952.4	66777	52025.6	33464.6	38428.4	139592	63702	39425.4	46031.8	78272.6	39801.6	44378.5	70228.7	93875.4	72217.5	62105.6	43444.6	20749.8	55819.4	51955.3	41641	64896.6	62001.2	35243.2	95989.9	48099.7	47219.3	24874	53805.7	76982.3	48257.9	26749.8	109096	73625.4
82	Unknown	0.896	163.4	40.02614:186 41.03793:1031 42.03368:950 42.97244:72 43.05389:646 43.34849:73 44.04901:6048 44.06775:38 44.11193:64 44.15449:50 44.21384:47 44.25522:58 44.28636:62 44.36924:51 44.75706:29 44.97865:1419 45.05259:162 45.98608:361 46.99439:1434 47.06794:3037 48:209 48.07423:26341 48.14252:83 48.1748:138 48.20121:83 48.23364:102 48.3556:30 48.76688:35 48.98938:199 49.07822:742 50.01487:537 51.02237:50…	39284.9	67677.2	36889.1	34380.5	48633.7	44511.8	46395.3	50778	39033.9	49051.8	60144.3	45366.1	62199.9	47561.1	32986.1	50167.7	74702.9	54477	37824.9	48032.7	52985.9	42367.9	47641	49144.4	66110.4	61718.4	46750.1	46394.9	34318.5	49136.1	42271.3	49866.6	46813.9	63702.5	45928.4	73342.9	44276.4	39926	35075.7	62534.5	68903.4	41146.1	32619.4	72404.2	70281.5
94	TRIETHOXYMETHYLSILANE; EI-B; MS	0.77	154.66	41.99234:209 42.9998:3101 43.05365:252 43.98972:1182 44.07035:195 45.01524:9292 45.05156:317 46.01522:776 46.06375:250 46.99429:1215 48.9908:685 49.07926:104 50.01474:292 51.02237:1028 51.51342:182 52.05055:86 52.98425:605 52.99546:177 53.02579:117 54.00851:69 54.04113:146 54.99972:875 55.05419:636 56.0256:370 56.06181:853 57.99545:73 58.02325:2061 58.99463:547 59.03066:4000 59.05369:136 59.94704…	12618	64350.2	13055	8000.86	3890.39	5461.95	31721.8	7864.96	6042.36	17367.7	5524.73	16319.3	77189.6	19107.2	4144.57	58047.4	11578.6	3897.43	33526	26224.7	86974.3	49851.3	31435.7	32392.8	59996.1	48729.6	47784.8	38157.3	3143.98	11723.6	5707.54	56019.3	5491.8	27464.3	5959.49	123524	3053.41	29102.9	91464.8	9833.76	97392.6	11577.2	8342.02	129761	165778
127	Unknown	0.919	15.23	40.03052:26 40.10733:4 44.97829:64 47.96717:14 48.00001:85 48.074:166 48.6636:4 49.00716:96 49.99494:117 50.26014:16 51.02211:181 52.03015:407 52.29012:5 52.52414:6 52.72113:11 54.03487:33 55.01701:11 56.0098:57 56.34206:4 56.50441:10 57.52734:83 58.02809:545 58.06454:140 58.79059:4 60.00266:613 60.02434:311 60.64252:5 61.00905:61 62.81902:7 63.81909:6 63.92725:48 63.96318:5 64.96066:292 65.36583…	3474.93	5163.85	1991.84	2393.16	3991.19	2094.4	2898.66	1931.45	2652.74	3858.36	3157.4	2934.69	3887.99	4956.6	1858.29	2442.8	4147.04	4243.99	3544.02	2713.15	4455.25	2085.41	4918.7	3007.91	3873.18	4488.33	4115.14	2957.49	971.549	1916.8	3012.08	4944.41	2162.05	3851.97	3180.09	3772.75	1843.51	2495.66	3708.15	3275.8	3605.46	3630.11	2949.59	3635.5	3837.24
130	Unknown	0.815	9.54	40.0174:200 43.98874:405 44.97878:446 45.34809:15 46.9942:414 47.06566:77 48.07378:91 48.98945:117 50.60146:2 51.02296:494 51.66223:6 52.03052:527 52.08852:35 52.98333:6 53.37358:2 54.04615:119 54.07356:3 55.83592:7 56.02476:372 58.0284:181 58.8669:14 58.994:350 59.96528:4 60.00277:33 61.00943:366 65.52776:27 65.94012:60 66.01954:131 67.05417:208 67.50774:62 67.9593:10 68.0256:33 68.42928:5 68.99…	1248.07	1122.46	1109.96	1285.89	931.961	1134.42	994.771	1137.53	1497.24	1569.34	1650.15	1855.81	2650.62	1577.53	2038.65	2410.94	1367.92	1551.42	1807.04	1957.3	2151.17	1462.1	1506.04	1309.03	2672.47	3635.54	3171.82	2812.09	2341.41	4069.68	1448.77	1542.6	1261.28	1483.39	1496.64	1787	1391.89	2496.56	1885.24	1678.61	3049.73	2503.1	1747.26	3212.81	1926.03
196	Oxalacetic acid+Pyruvate	0.348	687.03	41.03856:1174 41.99192:2477 42.03344:9710 42.99969:32549 44.00752:10295 44.05712:828 44.97898:39227 45.01523:83258 46.01497:1339 46.99444:12387 47.01217:2808 47.99411:871 52.98396:1630 53.97943:3494 54.01011:2969 54.99917:7551 55.04124:17291 55.99457:4658 56.01268:11075 56.04898:1956 57.98661:747 58.02297:43372 58.99443:25991 59.03083:131803 60.00228:8458 60.03065:3617 60.04191:1123 61.01013:1597…	161615	444039	141908	25312.3	210422	80385.7	159258	63819.4	24056.8	208057	65055.9	23303.7	55266.8	28563.8	10122.3	44492.6	23576.8	20170.1	36237.8	26791.8	52248.9	37106.9	221444	174333	43338.8	35035.3	30509.6	25738.8	23858.6	11127.8	20887	502766	123101	304280	127265	419759	26378.1	23859.4	249282	228204	49321	17745.1	110654	66893.8	89843.5
197	Pyruvate	0.659	728.48	42.99933:8558 43.98874:865 44.00687:2698 44.97856:21742 45.01513:12004 45.03157:182 45.97817:904 46.99376:3023 48.99118:409 49.5245:390 52.03031:967 52.98428:460 53.02506:697 53.03778:214 53.98044:264 54.0321:294 54.99914:1814 55.04122:3074 55.99444:538 56.01288:2464 57.98735:244 58.02269:10024 58.99421:7610 59.03061:37646 60.00226:2782 60.03002:4105 61.00977:4374 61.02726:1117 62.02737:253 65.99…	161615	444039	141908	25312.3	210422	80385.7	159258	63819.4	24056.8	208057	65056	23303.7	55266.8	28563.8	10122.3	44492.5	23576.8	20170.1	36237.8	26791.8	52248.9	37106.9	221444	174333	43338.8	35001.6	30509.6	25738.8	23858.6	11127.8	20887	502766	123101	304280	127265	419759	26378.1	23859.4	249282	228204	49321	17745.1	110654	66893.8	89843.5
213	Lactic acid	0.956	913.75	41.9918:1123 42.99955:12047 43.01741:4935 43.05377:1316 44.00703:8812 44.97871:3687 45.01522:39272 46.01436:2350 46.99422:7970 47.01184:768 50.99728:1714 52.00481:8986 52.50415:1335 52.98382:824 54.99926:4240 55.01734:15667 55.0528:14443 56.0079:1374 56.02469:2620 58.00496:730 58.0227:11814 58.99423:4621 59.03057:25474 60.00205:1735 60.0114:3063 60.03011:5167 61.00981:10252 66.02042:22609 66.5206…	1560783	2885583	1666755	16524.6	2049413	1108261	1377621	273405	31528.8	1404333	398236	14328.8	27634.4	24872	16000.8	15242.5	20129.1	21502.5	26098	84218.8	20987.2	26331.7	1717425	1478747	39803.4	27826.4	34494.4	20081.2	18109.6	13263.4	21783.7	2692397	1592950	2584627	1738010	2041373	56557.8	10793.4	424787	1840678	18567.5	15753	232294	34457.5	29107.7
218	Glycolic acid	0.726	17.62	40.02967:21 41.09063:36 42.00977:110 42.99952:1605 43.05403:476 43.07241:117 43.08388:103 43.11895:37 43.15479:30 43.27492:35 43.42854:47 43.46142:17 43.50515:27 43.5334:29 43.55082:11 43.99902:428 44.05701:641 44.9414:12 44.97884:208 45.01538:4558 45.04961:51 45.17502:19 46.01601:62 46.31384:19 46.99454:929 47.01175:610 47.96621:45 47.99442:111 50.01464:194 51.02279:1288 51.04874:16 51.56699:42 …	5356.93	7769.66	4379.82	4093.34	5097.43	3768.97	4340.33	4089.17	4913.42	5224.26	3857.62	10025.9	11263.5	8156.22	7857.25	8511.92	8973.3	7966.99	9856.34	12080.5	10711.4	9607.23	6572.46	5874.88	11670.2	10205.4	9564.79	9159.23	5004.01	7475.04	6007.35	7582.8	4427.27	7221.21	6329.58	7861.64	4689.07	4295.19	5446.99	5367.09	9733.75	7895.28	4873.67	11477	8805.82
222	Unknown	0.452	14.14	40.01743:59 41.2034:19 42.04637:255 42.278:4 42.31361:31 42.99963:232 43.05394:3157 43.11875:30 43.20035:14 44.0485:24 44.41808:6 45.01478:123 45.93938:4 48.99111:153 50.01488:184 50.77906:12 51.06287:9 51.98376:46 53.97842:125 54.61486:8 55.10314:36 55.25719:14 56.02523:413 56.0617:1292 56.11141:28 56.17016:15 56.29544:8 56.66079:11 57.24057:21 57.50273:11 58.07221:176 58.22695:10 58.34049:6 59.…	4422.29	10875.7	4389.87	7691.58	4056.56	5046.38	10888.9	8441.81	6182.91	9263.81	8902.87	4823.06	5839.3	6450.01	2170.21	5505.37	7162.24	4822.17	3682.53	2742.21	5563.77	2834.67	9010.01	7375.07	6507.28	7348.06	5678.91	4911.61	2545.59	6066.83	3577.38	9065.92	5172.96	8497.01	3831.04	15394.9	7407.5	17509.8	6229.04	6772.75	6111.75	4107.06	1655.25	13104.1	10322
237	PHENYL VINYL ETHER	0.793	758.3	42.9996:14309 44.00726:11665 44.97901:4933 45.01529:68897 45.05234:3396 46.01455:10530 46.06024:2709 46.99445:11223 47.01257:3833 47.0788:2515 48.0009:4257 48.07447:9094 54.99957:4531 55.99486:2875 58.01087:2537 58.02284:14895 58.99424:4747 59.03081:29846 60.03715:42995 61.00984:13572 61.04178:5379 62.01648:11215 62.0375:4636 63.02291:3643 66.02041:12139 66.52168:2528 72.03842:12671 76.03177:2466…	255933	183581	251676	302256	365730	214021	276987	307232	216546	363283	269496	231422	381808	316981	316828	342256	170409	289764	328143	358381	227719	320668	361572	243913	239465	266086	290484	292539	345966	225928	252944	352363	193140	333718	407935	262594	253342	245132	415260	332373	262740	292118	380528	207889	285601
238	1,2,3,4-TETRAMETHYLBENZENE	0.785	1079.34	41.03878:3100 42.04688:1183 42.99972:564 43.05415:9977 44.00735:382 44.04507:958 44.10271:341 45.0153:3673 45.9856:674 46.02109:463 46.06034:565 46.07283:687 47.06827:1125 51.02229:758 52.03032:1286 52.04084:497 53.03871:604 54.03432:406 55.05407:6349 55.99516:312 56.06198:5790 58.01062:1159 58.02289:1730 58.02826:1094 58.03639:2321 58.07359:807 58.99465:315 59.0308:2639 59.06749:264 60.00234:628…	255890	183809	251696	302174	365676	214133	276946	307327	216593	363327	269578	231468	381927	317110	316771	342338	170415	289759	328263	358468	227795	320738	361512	243918	239498	266050	290585	292498	346152	225958	253139	352416	193355	333804	407986	262602	253373	245166	415258	332442	262815	292128	380612	207896	285781
240	Alanine	0.815	49.54	50.01484:378 51.02262:1021 52.03043:1373 53.02553:371 55.05396:1192 56.06186:381 57.51902:166 58.02874:1236 64.01925:144 64.94272:214 65.03846:282 67.05417:323 69.06955:157 70.07725:731 71.83276:180 71.97016:270 72.08853:7134 78.03343:962 79.04089:2148 79.05385:340 79.53596:230 80.0081:145 83.08515:146 84.02455:343 85.10072:616 86.0417:475 86.05372:205 92.53848:397 92.99135:360 93.06768:225 94.06…	58637.5	88660.7	64193.3	95564.3	63628.1	38289.5	68430.4	63091.2	45766.3	122287	42164.3	25549.4	63544.6	35327.9	37925.1	108300	12312.8	27496.2	57557	54383.6	36229.6	46303.9	133022	71282.6	39097.9	41304.4	53512.9	53323.7	65367	35877.3	25547.6	200833	38390.1	123008	91479.1	181997	42890.2	96250.1	225352	65567.6	51228.1	41040.2	75969.2	56858.7	54038.5
241	L-Alanine	0.785	174.09	40.02606:375 41.03838:7894 42.04628:5740 43.05405:29098 44.05715:3371 53.03838:3986 55.05402:10089 56.06195:18408 58.0726:4432 62.94435:389 65.03848:1095 66.02049:1250 66.52101:508 67.05389:3024 68.06216:2494 70.00968:764 70.07725:23385 72.08838:6011 77.02158:2641 79.52509:410 81.06818:932 83.08518:1658 84.09284:20314 85.10068:29738 86.04146:1592 86.10383:3038 86.53309:297 87.54192:1488 89.04111:…	58695.7	88713.2	64258.5	95695.1	63710.5	38327.6	68527.2	63154.9	45797.7	122451	42218.3	25572.4	63609.6	35371.6	37963	108431	12393.5	27532.5	57571.9	54410.3	36271.2	46345.6	133160	71357.1	39138.6	41348.6	53568	53374.5	65425.1	36089	25573	200980	38425.8	123134	91549.8	182050	43039.5	96352.1	225560	65618.7	51369.8	41083.9	76038.9	56877.9	54095.2
247	Unknown	0.726	277.18	40.03036:64 41.03786:47 42.99917:521 44.97871:1206 45.97861:129 46.01449:183 46.99421:1191 48.07437:113 48.98981:373 52.01894:74 53.00148:279 54.99928:657 56.02556:116 58.06421:1199 58.99439:271 59.03075:1062 59.06724:190 60.01877:140 61.00987:1103 64.01709:102 65.0247:1010 66.03316:5300 66.04356:83 66.95616:47 67.01728:4946 67.05476:551 67.99451:54 68.01969:319 68.99359:167 70.07765:236 73.17252…	51798.3	248557	48861.5	7643.15	31793.9	24409.2	104017	24540.9	7182.43	102506	27404.2	1511.5	5108.83	1440.1	654.694	2354.98	1397.5	1327.87	4398.06	3071.08	5973.58	2987	102706	88836.7	3909.69	4172.8	3619.45	3277.17	1638.49	1264.02	1638	156807	40348	191946	39321.4	221222	8614.08	1886.05	96687.6	66749.1	3413.26	2455.64	26550.1	9049.12	5351.12
252	3-CYANOPYRIDINE; EI-B; MS	0.23	2630.23	44.00737:10721 45.98555:1887 46.01492:8438 46.99428:6534 48.00023:3292 52.00474:4034 52.98355:1529 54.99951:4982 55.99533:2464 58.00849:2852 58.02308:5473 59.0308:9628 60.02579:6173 60.03684:29679 61.00999:5536 61.02747:4964 66.02044:33368 66.52068:4873 67.0186:2876 69.95574:2760 70.02279:2683 71.97173:2053 72.02563:13912 73.5247:2662 76.03127:5469 79.04091:2169 81.53986:26688 82.0404:1579 85.987…	975751	1090499	1013543	994882	1106370	913632	991222	1124097	918777	1027081	1000136	1079013	1540697	1160574	1161260	1332379	1435958	1279032	1416969	1518366	1162515	1231567	1281253	1191287	1489972	1166068	1348109	1202205	1269185	1049901	1130933	1312915	913809	1321169	1205057	1196440	1010580	999886	1338984	1126084	1318122	1260401	1530256	1207342	1261074
253	Unknown	0.593	31.43	42.04557:461 42.9994:381 43.05334:592 44.53032:30 45.01511:3423 45.07182:71 45.98556:91 46.01518:51 47.012:69 48.00082:266 50.01453:207 51.02215:378 51.50054:197 52.00455:240 52.0305:133 53.97808:46 55.05356:189 56.00747:127 56.04823:130 57.72205:53 58.00918:540 58.14655:28 58.50285:37 58.75637:45 59.0124:725 59.06824:129 59.89802:50 60.00218:1444 60.03694:2228 60.06448:73 60.22338:39 61.00962:47…	35296.2	34406.2	38227	21364.9	41002.6	33466	26279	33558.6	21759	35657.3	30535.3	20194.8	33080.8	21706	22473.8	25946.6	24769.7	22292.3	27695.2	28687.9	20806.7	25273.2	37160.8	35251.8	27347.4	21658	25351.8	24631	32183.5	20609	23146.2	51258.6	33354.2	55961.6	50466.1	39510.7	24833.1	21457.2	43666.6	40420.9	26571.1	27887.6	48038.7	24755.5	26311.5
266	lactamide	0.756	25.91	41.70694:22 41.9917:301 42.04372:102 42.99959:1158 43.10938:19 43.98895:440 44.00748:648 44.04754:97 44.97865:735 45.01536:4142 45.02313:199 45.03484:106 45.19725:19 45.22279:14 45.24937:23 45.47969:15 45.65462:26 46.01932:207 46.99455:1177 47.967:217 48.00045:195 50.01469:58 50.53092:41 51.2139:20 51.51254:24 52.01696:527 52.03046:279 52.70691:12 53.03797:213 53.05162:16 54.04612:224 55.00018:68…	2872.73	11020.9	4146.21	883.863	4208.68	1882.54	2559.36	917.636	376.498	3147.88	704.103	1096.5	2376.11	715.386	375.722	3686.47	697.368	541.63	1179.46	895.976	2190.03	1415.95	4075.25	3786.46	2448.18	1815.83	1943.22	1700.43	185.568	1095.89	380.535	10016.5	3553.88	7927.03	2518.01	4740.72	513.86	1922.75	2679.22	4456.78	3395.92	1063.05	859.414	4186.21	4161.93
269	3,5-DIMETHYL-4-NITROPYRIDINE N-OXIDE; EI-B; MS	0.763	305.71	40.03128:243 41.03892:492 41.99266:462 42.00981:128 42.99928:1675 44.97888:2723 45.01537:1166 46.99486:3172 48.00168:328 48.07455:174 48.51294:68 51.02205:171 51.52383:64 52.01766:242 52.03032:720 53.97948:614 54.99889:624 55.05425:577 55.97774:139 55.9961:262 56.02481:519 58.02312:784 58.99438:1385 59.03081:3097 61.01099:1091 61.94696:139 62.02823:358 63.00605:455 63.94296:251 64.01775:1028 64.9…	56352.4	226011	58102.7	8304.62	30056.5	25513.9	113335	28455.7	9109.48	105090	31151.5	1795.91	5363.53	1371.86	825.974	2392.34	1428.74	1629.05	4067.57	3174.74	6232.45	3478.1	103067	92825	4335.18	4191.54	4048.15	2942.96	2066.53	1702.89	1515.49	132105	37078.4	171532	39547.2	180698	7260.42	1890.46	96075.1	56536.4	3171.99	2254.25	22400.2	7334.03	5152.01
270	3,5-DIMETHYL-4-NITROPYRIDINE N-OXIDE; EI-B; MS	0.437	16.57	41.0383:470 42.00842:524 43.98923:139 44.00633:177 44.97889:279 45.01521:1544 45.9794:352 45.99813:97 46.99448:3111 47.01262:247 47.06898:104 49.00738:244 52.98375:563 53.00168:121 53.03379:129 53.979:497 54.03329:118 55.05435:557 56.02518:463 57.98641:80 58.02306:345 58.07276:72 59.03108:1996 60.00165:507 60.05101:248 61.01036:1175 61.0276:180 61.94611:141 62.02782:122 63.95282:224 64.01783:1031…	56467.4	226520	58208.7	8323	30105.7	25583.8	113542	28524.8	9082.41	105274	31199.2	1798.88	5371.8	1373.93	827.205	2396.35	1430.99	1631.58	4074.95	3180.02	6241.74	3483.73	103220	92952.5	4341.68	4197.77	4054.2	2947.64	2072.25	1705.32	1517.64	132445	37131.4	171789	39605.6	181203	7270.73	1892.99	96196.5	56660.3	3176.53	2257.37	22466.7	7345.14	5159.01
272	BUTYLBIS(TRIMETHYLSILYL)AMINE; EI-B; MS	0.881	92.32	41.03841:97 42.9996:783 43.05421:204 43.95945:144 43.98907:939 44.00667:463 45.01544:1948 45.9953:206 46.99452:853 47.01823:246 48.99058:351 50.98107:71 52.98527:69 54.04626:433 55.01767:168 55.9942:289 56.00727:395 57.62811:33 57.98655:123 58.0227:82 58.06446:141 58.99364:223 59.0307:14801 59.07449:201 59.30333:33 59.40674:36 59.6563:38 59.77803:50 60.03022:1025 60.03526:291 61.00996:361 61.3194…	21925.4	19482.2	12011.2	13285.8	20789	17222.9	17556.7	23754.1	17406.5	22632.8	21762.8	20796.8	43266.7	21473.6	19853	29626.2	33372.2	32812.3	21723.9	25627.2	23390.8	23179.3	20648.2	22697.7	38160.9	31181.8	33706.9	25127	20116.4	31157.2	22567.8	13363.2	20507.1	23217.5	21687.5	21108	17967.9	23244.3	16118	24730.7	32514	26308.5	20236	31578.6	49218.4
276	Unknown	0.859	21.18	40.03227:52 41.0388:244 42.03292:36 43.00012:208 43.95598:46 43.98871:547 44.0141:129 44.10441:18 44.97841:76 45.01489:839 45.03286:111 46.00204:56 46.99403:256 48.07251:50 52.27974:13 52.47943:7 54.00958:26 54.04469:11 55.01718:294 55.05424:137 56.02562:363 56.06181:13 56.1382:16 58.02863:115 58.99424:251 59.03102:1679 59.05297:66 59.96537:25 59.99534:190 60.03048:242 60.06562:29 60.95538:38 61.…	7935.99	14420.5	6507.84	10714.2	5716.65	5384.11	9590.87	6534.43	5906.79	11457.1	9027.64	6584.35	12059.2	7557.68	5236.83	15957.1	7091.71	5924.9	9619.59	8523.98	15583.9	8679.51	13451	9451.29	14748.9	13162.1	11601.9	8759.05	3502.88	8854.97	4304.8	10369	6495.95	11699.2	7299.33	13072.2	5367.54	23778.6	14842.4	8581.13	15541.8	8693.83	5835.93	13802.3	16831.2
279	Unknown	0.904	8.04	41.03855:312 42.04465:122 42.99925:179 43.00461:109 43.05389:335 44.04481:35 44.1705:9 44.57023:7 44.70526:9 44.97798:35 45.01604:527 45.99261:67 46.96621:32 46.99485:140 48.00098:396 49.00562:73 49.05796:30 50.07709:9 51.0222:163 51.21421:9 51.95012:12 52.83675:10 52.98239:104 53.03979:200 55.05361:1150 55.4474:4 55.99447:24 56.02627:26 56.06182:1248 56.79044:9 57.3535:8 58.03615:774 58.07213:12…	2813.49	3637.85	2570.88	2597.23	3046.91	2370.63	2851.93	2778.92	2497.17	2397	2941.12	2716.72	3358.47	3287.35	2472.34	3164.33	2498.54	3090.41	2596.88	3039.43	2671.8	3045.54	3112.66	2817.66	3044.47	3533.53	3424.95	2562.77	1526.96	2204.68	2090.39	3127.68	2146.55	2931.96	2220.77	3630.14	1894.35	2400.01	2989.41	3011.65	3162.91	2597.04	2561.99	3524.42	3901.39
282	Unknown	0.289	8.28	41.03861:235 41.18085:5 43.0177:23 43.05397:274 43.35871:10 43.98882:56 44.25988:10 46.99429:483 47.12266:26 47.9939:7 49.00682:52 49.98891:22 50.01465:85 50.23546:3 51.0222:102 52.22445:13 52.73397:11 52.98325:20 54.01965:183 54.3646:11 55.0178:245 55.05383:377 55.08038:14 55.24792:7 56.02493:157 56.06155:395 56.20869:25 58.00436:17 58.02819:11 58.07386:79 58.32656:4 59.5228:12 60.01138:43 60.03…	585.735	357.411	237.765	471.553	421.358	206.878	607.916	213.824	316.223	575.323	131.856	939.413	3015.51	1153.93	846.003	4555.76	655.116	849.212	2347.5	1718.47	1198.08	1586.72	539.227	516.648	1613.12	1727.48	2374.42	2236.61	210.366	1560.07	567.018	1049.6	208.308	606.266	343.243	755.668	235.145	223.46	573.257	383.35	2473.16	642.192	437.076	3226.56	3030.25
283	Unknown	0.881	42.14	42.0092:161 42.04684:97 43.98895:390 44.04932:24 44.15885:10 44.97839:174 45.01483:699 45.05337:72 46.9944:587 47.99875:32 50.01508:97 51.68309:6 52.28228:13 52.39289:8 52.77508:8 55.01687:1939 55.2208:7 56.02511:214 57.98601:25 58.02836:543 58.05904:75 59.03087:468 60.00057:136 60.03645:138 60.16885:9 61.39537:7 61.94588:53 62.9452:64 63.01209:172 63.41014:20 63.96127:107 64.01465:78 64.23188:7 …	10469.9	18089.7	10202.8	21579.4	5185.64	5627.2	16450.1	12089.7	13164.2	11712.2	7062.48	25488.8	38415.7	26611	8608.19	56106	19834.3	11328.4	18738.3	13883	41587.9	17201.6	18397.8	15873.2	39513.2	33989.9	34482.8	28905.7	3026.85	27882.3	11507.5	24043.7	7936.85	23197.7	6693.93	20957	8840.08	24025.8	23387.3	7402.7	38118.1	17449.7	6735.68	50581.4	53665
284	Unknown	0.756	7.42	40.03046:28 43.13924:4 43.98886:67 44.0705:41 44.13675:7 44.45668:19 44.9786:125 45.97684:23 46.75786:10 46.99461:332 47.76828:2 47.86619:5 47.97182:27 48.66767:2 51.0219:188 51.09066:23 51.16656:3 52.00481:54 52.03037:124 52.04425:29 53.03926:34 53.534:3 54.03397:62 54.662:2 55.01693:10 56.02406:85 58.02785:207 58.99484:324 59.03084:52 60.00163:75 60.0617:100 61.00971:27 62.03058:6 62.94572:63 6…	2447.15	3740.88	2784.47	4345.79	1716.35	3338.21	4912.06	6787.03	4466.99	4100.63	6333.52	1919.88	2329.75	2179.63	620.029	2673.61	2413.14	1067.08	815.099	970.129	2575.67	617.138	4441.83	4721.04	2582.87	2269.46	1987.54	1613.75	2141.12	1957.85	842.536	3042.1	2706.42	3890.69	1610.31	3794.14	5092.9	4024.59	3091.66	1627.22	1885.12	778.86	992.769	2611.63	3294.62
286	methanolphosphate	0.556	30.57	42.0333:213 42.99975:1480 43.98897:848 44.97871:1236 45.01522:8107 45.98769:239 46.99445:1043 47.01319:465 50.01405:451 51.02348:464 54.99859:583 56.02407:328 58.99395:1938 59.03068:8560 60.03485:344 61.00948:658 63.00129:439 64.95978:355 67.0189:309 68.02646:224 70.02258:504 70.07728:221 72.03879:621 77.0052:2349 78.98438:771 87.02526:242 88.96069:603 88.98581:476 89.04101:3876 89.05115:238 90.0…	246026	645606	214193	273058	86745.9	113494	264270	216019	157402	527913	171957	160960	348202	111423	65223.9	398768	116059	64792.7	144556	134578	285941	194716	430382	357553	257356	256932	235594	199890	51398.4	177806	98428.4	399939	212930	631726	186826	1105110	86101.4	322767	1021295	225508	330423	145515	146247	517095	449025
287	methanolphosphate	0.881	1895.35	42.99949:1588 43.98916:611 44.00684:1186 44.97889:303 45.01525:11918 46.01566:879 46.9677:684 46.9948:1362 51.02264:899 58.02269:867 58.99432:1884 59.03091:11865 60.03045:872 61.00993:1069 61.0283:671 62.99843:608 70.02329:554 71.98942:377 72.03863:785 76.02937:937 77.00444:1544 77.02157:2227 78.01679:425 78.03374:724 78.98317:734 83.02927:330 84.094:283 86.97134:485 88.05708:385 88.95028:1039 88…	245911	645638	214148	273058	86745.7	113502	264239	216027	157410	527912	171960	160971	348214	111427	65186.1	398618	116060	64800.7	144501	134586	285949	194655	430407	357566	257366	256828	235621	199915	51388	177663	98409.4	399974	212882	631630	186859	1105344	86059.7	322764	1021385	225511	330304	145500	146173	517225	448999
288	methanolphosphate	0.533	7.6	42.00974:470 42.99928:1541 43.05404:199 43.98902:1920 44.00742:579 45.01523:1223 45.04556:75 45.99621:243 46.01473:558 46.96758:242 49.00737:162 51.02328:232 51.51291:62 52.01711:988 52.03067:1006 53.03924:168 55.00015:493 55.05448:298 56.06153:280 58.00438:116 58.02282:2211 58.02805:334 58.6468:72 58.9945:985 59.07489:54 59.15897:46 59.20969:54 59.33535:60 60.00217:770 60.03327:1527 60.99079:298…	245954	645748	214186	273115	86763.6	113524	264290	216068	157437	528094	171996	161001	348278	111449	65199.2	398702	116083	64813.1	144536	134720	286015	194694	430486	357634	257429	256889	235666	199954	51412.5	177724	98453.5	400058	212961	631805	186919	1105526	86118.9	322827	1021623	225569	330435	145551	146247	517289	449090
289	methanolphosphate	0.756	12.46	42.99941:5500 44.00729:4886 44.97874:4682 45.01526:34927 46.99445:5490 59.03088:1582 61.01006:10037 62.98944:2146 70.02261:1939 76.02508:1201 77.00449:11672 77.02106:9127 86.97165:1291 89.04086:32832 90.939:5074 90.97416:1356 91.01977:4240 98.00604:1508 98.50674:1232 99.0048:4122 102.96589:1752 103.9683:1477 104.98126:7330 105.01758:3178 105.96291:1824 106.00566:1375 113.02209:1133 113.51137:1244…	245948	645614	214237	273112	86762.2	113520	264287	216116	157402	528127	171994	161030	348262	111448	65216.2	398811	116101	64812.8	144488	134676	286005	194752	430496	357619	257463	256878	235660	199939	51402.3	177676	98425.6	400041	212892	631683	186904	1105547	86100.9	322817	1021576	225538	330363	145538	146198	517331	449066
307	Unknown	0.422	7.53	40.03049:40 41.11013:3 41.46198:2 42.21963:7 42.99942:345 43.72523:8 43.7616:10 44.05623:129 44.23036:11 44.66727:8 44.97809:221 45.01517:362 45.98593:134 46.00841:192 46.99408:132 47.27353:6 47.43128:7 47.62191:2 48.98918:9 50.01447:104 52.98338:7 53.02556:82 53.03748:135 53.31194:2 53.98323:77 54.03391:176 54.99867:151 55.04096:73 56.06115:938 57.37124:11 58.0284:318 58.07278:247 58.18911:21 58…	1781.26	772.114	1957.61	971.609	1650.76	1040.84	1415.67	1453.49	544.213	1638.74	1057.68	795.104	2432.99	712.297	552.887	1249.21	219.441	814.52	943.808	1231.88	853.302	873.263	1813.14	869.473	717.045	1373.74	1410.14	1376.44	994.316	859.963	834.581	2069.26	1113.79	4004.48	3403.22	778.114	484.701	725.413	2282.86	2474.93	1045.39	723.576	1829.55	627.989	998.276
310	L-Valine	0.911	30.15	41.02504:131 44.97895:149 45.01524:1231 45.99636:241 46.01493:153 46.99456:125 47.99408:74 48.00013:59 48.97288:200 49.00602:103 50.01506:168 51.02285:80 52.03052:828 52.07424:52 54.04644:114 55.05369:401 56.04742:209 56.11761:30 57.99583:116 58.02802:453 59.03048:1052 59.04882:255 60.00172:400 60.04543:503 61.00951:143 62.94447:216 63.02374:114 66.01937:58 66.95565:32 67.05394:515 69.05532:142 6…	7962.68	7699.01	6526.69	13553.2	6113.66	4355.51	9696.32	7268.97	5147.32	12659.7	3863.32	3618.93	6535.77	5821.52	7282.04	8847.66	3546.15	5152.18	6856.13	6515.21	3342.95	5809.88	13904	6918.43	6178.05	5662.15	6241.15	5053.88	7761.69	4858.57	2876.13	13338.7	3161.57	8528.57	5986.6	7269.5	5634.25	17431.3	17312.3	5860.93	4491.32	3651.58	5577.67	5877.57	6107.63
312	ethanol phosphate NIST	0.807	7.36	40.40948:7 41.20776:6 41.99218:33 42.04692:88 43.12186:14 43.98907:1319 44.0073:119 44.18912:7 44.50738:5 45.01519:533 45.057:57 45.09603:19 45.98784:161 46.99486:4 47.01158:22 47.29451:8 50.01518:269 50.02794:9 51.02233:221 51.98581:56 52.03076:818 52.11837:11 52.21652:6 52.34512:7 52.76804:38 53.22309:6 53.49862:20 55.07582:16 55.28703:11 55.66394:12 56.06226:173 57.19572:5 57.4498:9 57.99066:1…	1484.06	3752.78	1560.61	1931.51	2049.69	1427.1	2455.73	1424.29	1186.56	2428.51	1359.26	819.406	1908.29	1605.51	802.683	3299.28	1441.6	1245.57	1278.33	1422.44	2326.92	1237.56	3016.22	2302.58	1856.42	2385.71	1812.27	1325.54	836.355	931.041	790.578	4113.38	1235.27	2717.36	2156.04	5492.99	1415.57	2886.8	3487.07	2011.63	2816.57	786.991	1580.43	4335.24	3909.46
320	Unknown	0.578	21.79	40.02537:38 43.01701:50 43.13867:14 43.98884:133 44.01156:41 44.54082:8 46.06555:6 46.99415:259 48.6752:7 50.01427:281 50.04771:19 50.16798:10 50.88643:5 51.01054:180 51.02276:236 52.03038:336 52.98236:159 53.0909:8 55.66398:6 56.02632:191 56.04837:267 56.70524:9 57.92534:5 58.02881:1260 58.11805:10 58.19391:6 58.99347:54 59.07894:30 59.66876:5 60.07347:42 61.2298:9 61.46389:8 61.92173:29 62.0130…	5261.5	6158.35	4516.77	4457.56	5803.77	4207.26	5291.61	6066.6	3975.9	6334.27	4653.52	3606.74	6480.49	4708.93	4357.16	5475.29	5499.91	5586.47	4382.22	4760.2	5453.23	5175.56	7069.56	5598.74	6613.15	6521.97	6030.11	4913.76	3980.98	4149.38	3710.03	4977.71	4308.75	7386.79	6619.21	6290.91	3543.19	6077.55	6508.26	6304.53	5258.89	4799.82	4295.98	6412.07	7280.73
322	Unknown	0.815	8.6	41.32206:10 41.37004:12 42.04508:94 42.41338:5 42.99971:330 43.05373:3747 43.0722:85 43.15387:8 43.77471:22 44.97866:367 45.01536:465 45.03293:219 45.12576:18 46.01423:74 47.05897:10 47.2573:18 47.68227:11 49.00764:78 50.01408:117 51.02256:400 51.11138:12 51.66942:16 52.0299:342 52.17627:10 52.27443:8 53.03752:246 54.04666:260 54.1927:9 55.00563:154 55.05388:1353 55.25669:6 55.51009:10 55.69695:8…	6490.7	5903.58	5649.01	5418.74	5385.98	3888.83	5965.6	4453.1	2870.37	5877.46	3987	5262.87	9886.95	6754.75	5746.48	16064.9	4865.6	5688.08	4758.54	5915.27	7287.47	7699.12	7358.7	4638.43	8645.98	8463.27	7920.13	7786.1	2715.4	6649.84	4677.52	5382.73	2400.29	5577.65	6895.74	5777.7	2539.74	4399.24	7264.23	5554.59	10776.8	4533.54	3236.65	10150.3	13173.8
323	L-Valine; GC-EI-TOF; MS; 2 TMS; BP	0.741	62.29	42.99972:670 45.01518:1413 46.99441:347 48.07425:136 50.01457:360 52.98385:222 53.03766:360 54.03328:401 54.99903:179 55.05384:66 55.07406:54 58.07281:187 58.99382:63 59.03072:2605 61.01015:590 61.99924:66 62.51292:40 65.03893:288 67.01881:163 67.0537:475 68.06144:1051 69.06946:1729 69.97317:296 70.09505:42 71.82832:33 72.08817:414 73.14527:65 73.19144:62 73.20215:72 73.21574:116 73.64726:32 75.9…	4150.12	2660.8	3892.03	2096.84	8508.66	3483.99	6103.66	2549	1421.51	7727.2	3013.3	15397	24436.2	19280.7	26320.8	16789.2	13535.1	20098.2	25535.5	39163.7	17777.9	33596.7	8657.22	5498.48	19656.9	17329.9	21311.5	19086	1689.47	8005.83	16485.5	4529.06	2255.89	2357.14	11362	10631.9	1607.79	127.715	8740.5	9667.05	19408.3	15903.6	10251.1	23487.7	23524.1
327	Pyrophosphate	0.785	4172.18	41.99218:318 42.99985:951 43.05419:384 43.9891:307 44.00787:315 44.97873:892 45.01528:6624 45.99628:268 46.01421:822 46.01875:1191 46.99427:1557 48.99016:341 50.01414:667 56.01297:1438 58.02844:867 58.07386:539 59.01254:966 59.03086:3493 60.02475:1482 60.03552:455 61.01025:1381 62.01376:404 63.0057:1604 68.99412:6197 72.03865:1294 76.01334:921 76.02663:1270 77.02125:15393 78.03267:1583 79.01779:1…	1297604	2030859	1212052	831113	896214	577524	1461051	958849	638465	1461209	988235	1345210	2640835	1262848	546007	2264226	1345450	1039361	1342600	1282220	2132237	1894485	1512615	1232941	1984099	1860863	1730455	1601643	228568	1422740	1214216	2016719	1029166	2099959	1159968	2358365	423480	1141917	1614574	1574655	2774690	1198452	1244384	2878193	2742943
328	pyrophosphate meox2	0.689	4188.33	42.00893:367 43.00024:907 43.98897:734 44.00678:1542 45.01538:8359 46.01455:986 46.97439:535 46.99433:1231 51.02293:521 52.03043:733 56.01325:1294 58.02336:1448 58.02925:490 58.99497:899 59.03079:3195 60.02418:2031 61.00977:1285 62.01636:349 63.00619:1339 64.01169:565 65.02629:294 65.03815:323 68.99396:2921 69.99698:474 70.02393:607 71.99025:384 72.0382:1268 77.00471:3044 77.02125:2782 78.98423:8…	1297576	2030830	1212011	831098	896570	577501	1460998	958812	638547	1461189	988204	1345249	2640762	1262807	545987	2264234	1345413	1039330	1342607	1282207	2132162	1894437	1512557	1232902	1984034	1860793	1730407	1601621	228569	1422870	1214242	2016711	1029407	2099945	1159936	2358298	423454	1142053	1614850	1574501	2774707	1198581	1244382	2877953	2742938
332	Serine	0.919	23.34	42.0466:247 43.35846:20 44.00711:145 44.05685:74 44.08898:21 44.97887:800 45.01543:1608 46.01495:39 46.99455:548 47.00958:37 48.0104:31 49.00684:100 49.07922:55 49.54626:39 51.38046:16 51.4956:33 51.90214:24 53.02582:108 53.99216:55 54.9993:36 55.82296:18 56.0126:179 56.0802:19 57.09024:114 57.19769:35 57.52622:43 57.9859:67 58.02879:180 58.99536:184 59.13748:23 59.23741:17 60.00275:37 60.02581:1…	7411.14	17566.2	7759.15	11139.4	7868.81	6200.55	9630.63	8826.02	10020.7	8461.85	9225.91	9257.46	13054.8	12327.2	5470.05	11654.6	13193.2	7937.63	7294.09	6953.05	14129.6	6444.9	10669.2	11223.8	11840.1	12535	11208.7	9071.41	7839.01	9815.44	8500.83	12199.2	9237.58	16740.2	9894.43	19754	10870.3	11454.8	11512.3	12108.7	15749.4	5698.94	6585.39	17741.5	21393.1
339	2-Aminoethanol	0.948	248.86	40.02444:61 43.98903:792 46.01422:443 50.01436:61 51.02203:688 52.98331:67 53.03841:79 58.02826:815 59.0306:3876 61.02771:362 62.01488:125 65.95775:81 67.05293:395 69.97389:172 70.02138:126 71.97352:88 73.16702:48 73.21668:111 78.03268:167 78.97503:98 79.0406:503 80.04305:242 83.08465:115 84.03081:147 86.00821:109 86.04112:6758 87.00827:162 87.04114:839 88.03802:356 88.98586:138 92.06208:140 92.9…	71619.6	98405.2	65160.7	44282.2	82348.9	59785.8	85160.6	54040.4	32900.9	86168.6	56343.5	58792.4	102866	72882	49271.2	76026.4	59521.2	60691.8	81755.6	89472.8	75003.1	67528.7	87569	70217.3	83685.1	84505.7	77728.2	67310.7	27225.4	64930.9	64397.3	93791.7	63799.4	101486	91652.5	128301	36129.1	43957.5	95380.9	107238	95037	68346.4	40910.1	117639	111728
340	Glycerol	0.074	93.42	41.03838:6432 54.99931:3971 55.05368:14342 56.02505:12848 58.02283:14935 66.01978:5056 70.02254:7649 72.0383:29557 85.10027:1880 87.06155:11259 88.94997:2748 89.04089:57791 90.04227:4797 91.03741:3347 99.02496:5538 101.00436:9094 101.04067:38538 101.99418:3086 102.04293:4403 103.00188:1895 103.03754:4565 104.0019:2375 104.0578:4740 105.05316:2243 113.04001:11166 114.04201:1828 115.05597:10779 116…	309251	347158	259029	307175	381465	306676	308748	360598	289572	392076	346613	327031	425745	343192	296261	357821	405284	377396	318242	363664	343348	315066	379333	336154	398910	391555	350178	305304	285471	324286	271060	347487	266835	356953	367109	291427	301449	307021	346587	389226	339911	298005	309866	313426	412126
342	Unknown	0.074	27.56	41.03815:2875 41.99228:167 42.0414:1286 43.98917:566 44.9787:536 45.01525:1525 46.00839:201 47.01263:187 47.9934:143 48.99014:141 49.52396:301 52.03014:1995 53.03827:213 53.99625:137 55.05379:2151 56.01276:226 56.04903:1786 58.07324:320 59.03072:2890 59.07568:167 60.00352:210 61.99155:142 62.02862:121 63.02335:190 63.96279:200 67.05355:1817 68.0484:443 69.07943:166 70.02325:215 71.98923:135 72.03…	199511	197728	151118	191534	242346	196103	193749	228518	180706	250011	213259	213320	274244	220872	196425	222407	256765	235739	203699	217992	212577	207579	229353	208982	260194	244172	222411	195314	193157	216866	179556	225069	165281	204652	230380	183000	197476	192456	224486	259288	225844	192484	209773	193515	271200
347	Glycerol	0.956	4936.03	41.03831:3278 44.97864:2061 45.01503:1938 46.99419:5040 55.05361:5605 56.02503:4622 58.0226:4117 59.03054:15838 60.00198:1448 61.00973:6007 72.03828:3613 76.02577:2866 87.02499:1684 87.06113:4909 88.03293:6037 89.04066:39537 90.04135:3123 91.03694:1763 99.02523:2633 101.0042:4459 101.04056:53604 101.99453:2596 102.04153:3863 103.00185:5631 103.05623:500085 104.05789:25691 105.01764:2287 105.05299…	1823678	1870473	1409923	1807238	2250011	1754736	1770254	2070210	1710886	2344837	1970831	1920767	2527682	2033142	1758987	2014243	2389767	2172395	1937490	2001857	1981506	1891447	2096463	1905875	2313850	2202722	2075880	1820012	1664111	1870940	1617661	2036248	1513601	1938094	2085441	1658074	1753449	1756657	2095108	2291972	1951127	1768910	1850042	1787179	2479474
354	phosphate largeDELTA RI	0.778	2067.81	43.06698:12053 44.0073:6384 45.01516:73571 46.01494:7412 46.96803:882 47.01197:4951 56.00698:1225 60.03054:851 61.00991:4179 61.01973:3093 61.02766:1647 62.9894:843 66.01981:2509 73.29306:1156 73.33498:1226 73.6306:851 73.72203:867 73.7883:1141 73.87568:1177 76.04637:1858 77.00452:12458 77.02221:2164 78.9838:1826 86.97065:2132 87.02501:990 87.06161:2328 87.97822:1033 88.94956:4542 89.67377:1161 8…	881743	945862	703992	839991	1069352	837350	859727	973946	807968	1081001	913794	911249	1177079	949768	828678	965610	1138339	1011207	883969	961738	917014	871948	1010206	899674	1096352	1049125	962727	848152	799572	887823	762292	1051223	772728	992318	1013088	800583	840814	832753	959588	1088266	942451	816268	886193	863282	1172017
356	Phosphate	0.733	2171.9	42.99936:10340 44.00729:12619 45.01518:147847 46.0149:7420 47.01228:6338 54.9995:3835 58.023:5263 59.03081:40623 60.03003:3667 61.00998:12285 61.01911:3028 70.02267:6757 70.04633:3415 72.03822:19226 77.00468:13991 86.97084:3827 87.06213:6561 101.99425:3195 102.0442:5884 102.9657:24360 103.0019:10138 103.97302:4785 104.96195:3664 104.98157:19229 105.0176:8648 115.00194:40162 116.00166:6551 117.017…	880578	944789	701478	838791	1067036	837731	859842	976787	807045	1079846	913710	910587	1175263	949790	827988	967940	1138657	1011869	883528	964277	920989	871148	1010001	898185	1095228	1049044	965291	849602	795304	885486	761690	1050682	771943	995972	1015660	802855	839181	833534	956760	1091263	940475	816295	887209	865399	1178038
359	Glycerol	0.504	38.14	44.00737:15447 44.97882:6781 46.0148:9197 54.99951:6058 55.05375:19731 56.02525:16848 58.02292:21125 58.99424:6682 72.03841:38497 76.02528:5793 76.04639:3646 86.97064:4755 88.0331:6644 89.0409:103275 90.04195:3653 91.03679:4593 99.02508:8317 101.00391:8684 101.04079:140879 101.99444:4863 102.04202:10586 103.03803:6626 103.05654:985196 103.97348:2770 104.00208:3239 104.05794:53203 104.98057:3675 1…	312566	347734	259466	308221	383344	307790	310041	362083	289932	393293	348344	327631	427368	344359	297677	358693	407321	378393	319001	364118	344130	315541	380857	337163	400308	393114	353697	305951	285095	323516	271714	348192	266421	357843	368381	293023	301739	308029	348293	389304	338915	299576	309783	314969	414581
360	phosphate	0.615	4.91	42.99966:547 44.97894:230 45.0154:926 45.14048:31 46.01852:693 46.99455:226 48.07429:90 48.99038:127 50.99823:78 52.03057:397 53.03782:350 53.97839:162 54.04608:420 56.51575:28 57.99698:122 58.2668:25 58.99451:116 59.02209:286 59.05266:48 60.03255:198 61.00977:343 61.03254:64 61.94627:376 62.01244:278 64.53348:57 64.96039:119 65.01516:111 65.96288:48 66.02159:102 70.02369:62 71.95139:24 71.98998:…	1817909	1863432	1405053	1801365	2242440	1749167	1764834	2064197	1705696	2338159	1965099	1915340	2519857	2027035	1754083	2007358	2383354	2165426	1931679	1994466	1975568	1885914	2089957	1900499	2306692	2195935	2069296	1814371	1660472	1866022	1613023	2029337	1509521	1931571	2078795	1652035	1749198	1750975	2088462	2285547	1945890	1763387	1846196	1780894	2471418
368	Nicotinic acid	0.696	18.16	40.03044:59 42.04607:178 44.00704:112 44.97846:672 45.01527:571 45.05154:80 46.99461:85 48.07434:24 50.01503:494 51.0229:1687 51.11048:27 52.03056:39 52.98425:155 53.98405:50 54.03396:184 58.02312:265 58.99409:85 59.96529:49 61.94789:114 67.01671:230 69.03351:65 70.01114:43 71.98887:22 72.03809:202 73.18074:94 75.26452:24 75.48171:23 76.02514:244 76.98246:28 77.00455:244 77.0215:498 77.03706:64 7…	1353.79	1799.48	1016.06	4839.26	827.261	993.394	745.729	1708.91	3207.83	1664.22	1479.17	3329.84	4666.05	1971.13	743.952	4403.11	2674.78	1116.48	2297.24	1417.22	5123.42	2627.4	2439.98	2305.88	3944.22	3291.89	3818.28	2816.91	3002.52	2296.94	1107.92	1070.12	1470.98	1603.17	1432.32	1918.87	2467.64	6514.45	3255.15	1007.91	3147.44	896.68	1345.68	3623.13	4323.79
369	Threonine_2TMS_minor	0.867	11.99	42.0092:44 42.04655:496 42.18861:9 42.7119:14 42.99968:309 43.14924:17 43.43869:12 43.98915:561 44.0074:141 44.97882:331 45.0151:318 45.03292:17 45.34245:11 45.37579:12 45.43552:10 45.66518:9 46.01588:95 46.99463:711 48.98152:79 50.01523:180 52.00468:54 52.03016:20 52.98358:64 53.03704:120 53.77001:30 55.01693:107 56.02515:42 56.04933:873 56.06136:699 56.21052:22 56.81276:9 57.08493:10 57.09217:2…	4185.35	2656.47	3211.02	8229.54	3257.63	2647.59	4129.67	5418.05	3734.61	7657.62	1798.59	1295.78	2038.21	1383.31	1979.53	5126.62	1022.69	850.225	1879.87	1327.32	1115.8	1291.27	6360.4	2535.57	1743.42	1432.33	1463.04	1833.44	9241.09	1641.62	840.376	5103.95	2534.16	4242.6	2544.56	2195.73	4218.55	3712.38	8259.57	1393.59	1572.91	1194.29	3535.33	1139.31	3109.53
376	Unknown	0.378	940.07	41.99171:451 42.04676:154 42.9996:5134 44.00742:3558 44.02269:304 44.05846:230 44.97874:2823 45.01536:9213 45.16751:125 45.19495:109 45.73311:118 45.98518:7656 46.01512:1586 46.02126:624 46.04065:148 46.11732:78 46.99418:838 47.01186:2501 47.02766:176 47.98182:611 48.00088:14381 49.00004:899 49.0572:77 49.99723:345 50.9971:724 51.497:159 52.0053:1256 52.50878:344 52.98402:881 53.03704:331 53.9912…	369758	395503	303263	353194	455368	349824	354849	415882	332749	449971	397029	370872	474970	407790	347828	419762	469897	421757	361547	418877	382119	350170	426913	372958	460769	440535	401003	366989	326262	357576	347318	411190	329792	451732	415267	374824	333395	350711	391654	425446	385284	347217	376373	388411	477221
377	Unknown	0.911	7184.67	41.99197:794 42.99937:6686 44.0073:5573 44.02154:579 44.97868:6436 45.01512:5711 45.98494:14271 46.99448:2283 48.00065:29473 49.00036:1817 49.99738:1622 50.99683:1466 52.00464:1346 52.98411:786 53.03596:1136 54.9991:2892 56.02507:11457 58.02279:14605 58.03633:101799 58.99375:5724 59.03051:4898 59.04378:9476 60.00197:1010 60.01887:1658 60.05092:5437 61.00835:4802 61.05755:1668 62.01609:18074 63.02…	611971	683469	495649	604524	752502	570040	607925	687206	562514	736061	677879	628748	799023	679794	574170	697083	793817	722292	625391	694536	638999	597601	720558	629007	760906	745755	676241	605390	552130	583768	573979	686588	542134	747607	691184	633147	548072	582886	641399	721721	650177	578858	609632	659280	777591
381	Unknown	0.748	6821.79	41.99413:229 42.0453:218 44.00745:2296 45.01522:13660 45.98488:905 46.01442:5235 46.02067:959 46.99439:383 47.01224:1204 48.00051:1080 52.98424:399 55.00003:708 55.05333:451 56.02507:778 58.02265:5618 58.99434:403 59.03074:3083 60.00278:337 60.03691:6291 61.00943:1278 61.03744:2272 62.03328:1001 68.06218:224 69.9556:454 70.07698:353 73.30112:577 73.32481:496 73.365:480 73.3997:365 73.42091:188 73…	220661	205069	191238	110363	255594	206905	164858	197138	109758	241660	200356	98449.5	135212	123282	93901.3	104577	118281	115318	102983	111722	101844	97748	192977	173679	116865	114128	102942	100413	133031	98037.1	91076	249685	184634	276240	277055	197217	130797	99468.6	203060	256234	115835	95354	192856	118752	128977
384	Unknown	0.867	105.05	43.01747:3480 43.09542:37 43.9895:867 44.05952:183 45.01524:854 45.03301:28 46.01537:300 46.99415:422 50.01405:95 51.02285:213 52.00484:192 52.02998:102 55.96956:25 55.99332:147 59.03103:1693 61.00967:65 64.01261:162 65.52677:36 67.0539:127 68.99446:423 69.97304:91 71.9492:78 71.99054:166 72.03809:348 73.21381:88 73.26296:60 73.31432:82 73.77541:24 73.83419:19 75.19196:23 75.26857:19 75.31024:28 …	33416.5	60218.6	32610.5	42857.4	34712.7	22875	28759	26616.8	38455	33783	23818.2	27310.5	46217.3	29587.1	24157.5	40411.1	28287.8	27440.1	27505.2	43664	37719	32421.1	44208.6	38192.6	39722.6	39419.8	36960.8	33800.1	24601.4	30398.1	22349.2	70040.2	29630.5	59622.9	30659.6	43145.3	41831.8	19755.1	36411.8	36345.3	49381.3	26422.8	45887.7	38810.7	39686.5
385	Unknown	0.741	35.36	41.03828:591 41.80178:7 42.04662:443 43.01793:1388 43.05378:5842 43.15049:40 43.29672:15 43.36459:7 43.48322:15 43.77106:10 43.9886:413 44.00657:319 44.05643:249 44.18733:14 44.30837:11 44.97884:324 45.0153:1158 45.5223:10 45.62098:13 45.81188:18 46.01693:316 46.99368:382 47.99968:84 49.00666:180 50.01448:67 51.022:32 52.00486:21 52.98328:160 53.56826:8 53.99221:138 54.04686:318 55.01816:96 55.05…	5366.03	5564.32	5751.75	3276.33	3346.88	2956.07	4590.1	3393.88	1832.31	2120.01	3312.37	3783.61	4334.63	4570.08	4055.54	7014.69	3449.79	3438.99	3962.75	5958.09	4559.93	6206.11	5464.37	3728.96	5062.49	5096.53	4806.57	5553.78	2887.51	4164.78	3608.45	5976.06	2379.24	5663.39	5317.05	5427.07	2167.55	3773.41	6214.06	3817.2	6540.35	3222.37	3075.91	6076.28	5856.29
394	Glyceric acid	0.889	24.62	41.24232:10 41.99132:118 42.99974:94 43.05406:97 43.07381:77 43.08429:34 43.15763:45 43.21389:32 43.65168:22 44.05826:29 44.88099:14 44.97916:176 45.01551:1108 45.30518:16 45.99632:46 46.99443:390 48.00095:59 48.07369:99 49.98891:10 50.22099:10 51.02236:28 52.03072:596 53.97895:41 55.01774:317 55.14812:10 55.24076:24 56.02627:90 56.29489:19 57.12133:50 57.21318:8 57.67455:19 58.02577:135 58.07222…	5235.63	14426.4	6076.64	5330.83	5922.56	4972.17	5286.78	5925.29	4220.32	7061.75	5601.41	5888.48	9033.48	8371.62	5450.65	7633.67	7465.78	3901.73	7422.79	10032.7	8281.51	6038.66	9293.29	7653.46	9033.64	9861.98	8564.53	7098.91	3730.76	5035.57	6151.76	12333.8	4905.38	13215	7477.73	14597.7	4775.81	7371.85	10884.3	5556.97	9812.07	5217.17	3919.11	9527.8	10303
398	Unknown	0.919	43.82	41.03868:171 42.99986:406 43.36305:13 43.9357:11 44.05829:290 44.27447:26 44.97905:233 45.0153:1194 45.67818:23 45.9934:84 46.01415:82 46.6962:12 46.97412:131 46.99416:313 48.00018:194 49.04924:7 50.01469:14 51.02205:24 52.31158:24 54.0464:176 54.99917:136 55.06697:27 55.74088:12 55.97255:59 56.41934:11 56.523:5 56.5916:9 56.88955:12 57.09106:142 57.7193:11 57.83814:19 58.02865:591 58.26691:22 58…	6663.41	7493.7	6513.24	7211.27	7613.62	7041.95	7917.67	8164.07	6732.95	8307.26	9219.69	7934.88	9994.87	8557.71	7115.07	6518.83	9427.34	9499.63	8154.53	8934.56	7285.82	7137.68	9411.14	7035.56	9076.25	8182.31	7571.76	7617.5	6957.67	6750.94	7425.08	7960.7	6381.98	9824.91	9093.24	7854.24	6935.99	7029.07	8184.15	8621.42	7273.84	7602.63	8386.32	8791.06	8971.81
401	Fumaric acid	0.2	42.59	42.04511:424 42.99971:1648 43.07871:122 43.11896:86 44.0072:273 44.05759:166 44.97876:374 45.01543:4727 45.15997:42 45.18515:45 45.97823:245 46.01459:639 46.99477:1862 47.0115:199 48.00066:263 48.07495:149 48.99208:173 52.00509:937 53.00219:1541 54.00912:759 54.04651:172 54.99943:806 55.01767:1247 56.00713:223 56.02408:404 57.09102:146 57.16257:61 57.17442:45 57.20479:68 57.24775:46 57.82222:42 5…	3341.73	10794.8	3314.53	9026.32	1506.26	1788.78	6179.85	3083.67	5091.46	3728.86	2389.11	6374.63	10456.7	10166.1	2951.97	23602.9	5721.81	2646.07	8553.61	6469.48	14531.4	6675.78	7887.08	7493.02	13183.1	11321.5	10945.6	10804.5	2968.76	7484.44	3312.13	14108.1	2186.19	7398.5	2018.31	13940	3925.49	28860.3	10817.1	2705.34	17297.3	3988.54	3155.36	23018.1	23235.2
411	Unknown	0.904	2372.9	42.99947:672 43.98892:1000 44.04884:285 45.0151:7693 45.03297:228 46.02091:1212 46.99529:315 51.0225:229 54.9991:473 55.0545:1192 58.02252:717 59.03034:3605 59.0695:279 60.03709:13835 61.01092:459 61.03721:1802 62.0332:1053 63.03763:362 67.05402:229 70.03661:349 71.972:231 72.03769:1014 76.03119:3265 76.06512:1478 77.02093:410 77.07049:301 79.04134:698 84.02581:244 85.98815:436 86.05405:242 87.06…	407462	581722	260042	352548	627723	526782	406061	750878	647731	549540	736577	425264	738808	514328	423211	343046	1217790	808244	513406	728767	456466	313257	553442	668431	797130	637367	596844	341058	575773	487705	490838	555906	601355	666246	482825	720062	693188	502199	340171	658212	499685	584463	696837	648842	686874
412	Unknown	0.933	50.24	41.03891:155 42.99935:78 45.01497:848 45.21888:32 45.40763:9 46.0033:54 46.02129:161 46.99462:381 47.01168:109 47.07877:174 48.00091:299 48.98929:171 51.02284:22 53.02572:20 53.98933:20 55.81033:9 55.96866:77 55.99536:105 56.02546:58 57.18809:37 57.96967:33 58.02249:350 59.1326:17 59.57629:17 60.02092:149 60.03692:933 60.05878:133 60.11256:20 60.15825:20 60.2713:11 60.33083:31 60.79658:22 61.0362…	14898.4	20686.9	9037.62	12318.7	21091.3	17552.5	14233.5	25263.2	22450.6	18729.1	23614.8	16216.8	24904.8	17127.9	12381.9	12332.6	40729.6	28160.9	18493.1	24566.8	15378.4	11106	18910	23926.1	27069.6	21004.7	19806	12224.3	19464.8	16881.5	16554.8	18769.5	19586.8	24136.2	16725	22284.2	21270.7	17387.6	12247.7	20910.8	15745.9	20907.4	22130.3	20399.8	23730.9
419	Unknown	0.911	41.48	41.21748:19 42.0459:182 42.48904:12 42.57212:6 43.0005:7 43.33142:12 43.98888:575 44.00724:148 44.24607:17 44.97796:211 45.01484:548 45.40474:8 45.66582:10 46.99464:197 47.96602:25 50.01501:52 52.0307:477 52.98419:55 53.03691:299 53.78966:9 54.04533:549 54.50242:65 54.99906:217 55.05395:322 55.0692:9 56.00571:192 56.06179:201 56.3832:6 57.17263:14 58.02834:538 58.03531:152 58.05826:224 59.0309:36…	5086.71	6962.24	4427.16	4606.44	6535.67	5522.58	5373.56	7948.26	5920.41	6770.71	5151.01	4996.19	8990.99	6316.06	4643.7	6246.31	7966.5	7675.81	6374.71	7397.21	6789.92	5428.38	7624.75	6752.78	6965.4	8145.8	7686.23	4876.2	5711.92	5527.13	5416.37	6245.89	5678.64	6968.17	5661.39	6292.23	5068.34	5485.94	5902.33	6591.57	6750.1	6099.54	7101.49	7029.6	8794.43
421	Unknown	0.519	16.84	43.53243:14 44.01329:236 44.05719:91 44.97914:14 45.15472:24 45.97796:175 46.05916:35 47.1596:8 48.07238:117 50.10746:5 51.02259:297 51.97575:49 54.03268:119 54.99955:91 56.57097:14 57.20508:17 58.99398:209 59.03055:231 59.12481:24 59.26527:9 60.00024:61 60.04788:124 61.00944:321 62.01426:111 64.01026:95 67.92371:13 68.99429:152 69.06891:664 69.99502:57 70.78479:14 73.10495:11 73.16434:20 73.3413…	2280.5	4959.58	2270.78	1329.74	1289.76	1310.12	2522.4	3370.69	1135.77	850.477	3067.37	2481.14	5648.44	3171.93	1198.53	2954.12	5803.91	2665.04	2603.14	2764.7	4966.63	2143.17	3372.63	3905.91	6527.3	3583.55	4079.43	2384.57	407.496	1896.46	2531.45	3851.4	2375.22	5223.32	2009.54	7209.09	760.182	2587.64	2152.26	3398.04	5752.19	1977	2195.05	7026.41	4343.95
422	Unknown	0.815	20.74	40.55175:3 41.02586:69 41.03738:167 41.06485:26 42.03162:69 43.73705:29 45.01507:193 45.1472:15 45.20737:19 45.99708:76 46.01961:144 51.02227:692 52.03043:536 52.983:88 53.03816:85 53.18503:2 54.14535:3 56.02544:159 58.01498:101 58.20075:6 58.52136:17 58.7057:7 59.03055:364 59.04728:18 59.31831:7 59.63089:3 59.9985:102 61.23059:6 61.9459:39 62.01426:69 62.98911:95 63.63471:5 66.04585:136 66.75426…	2226.08	3706.33	2480.97	1516.67	1793.93	935.044	2559.01	1747.75	923.828	1906.97	847.235	2263.66	4779.92	1655.43	1200.51	6076.28	1762.56	1077.47	3523.81	2699.24	3878.87	2420.6	1935.88	1954.92	2365.01	2702.07	1411.74	3293.98	483.321	2718.66	1284.5	2699.89	973.892	3345.16	1445.19	4696.81	445.188	1059.31	2202.05	1159.51	3501.03	1183.14	872.641	5337.82	5051.64
423	Unknown	0.748	30.93	42.99958:329 43.3951:21 43.66018:8 43.6876:12 43.98884:193 44.00739:180 44.06034:114 44.38484:7 44.86012:4 46.99462:311 47.166:4 47.68866:7 48.19059:9 50.01492:254 50.46983:6 50.70221:3 51.02336:230 52.98315:66 54.01967:83 55.62275:2 55.97041:104 56.19724:12 56.33948:4 57.29355:35 57.38917:29 57.57637:10 57.63247:7 57.73185:9 58.02788:124 58.07196:143 58.31037:7 58.37179:8 58.99438:120 59.99955:8…	2996.63	10707.6	2529.65	2742.99	4026.27	5253.14	4339.94	7793.06	9335.8	6670	9045.39	5345.55	9234.73	4906.33	3215.11	5042.67	25070.3	8657.62	5483.79	7596.74	8833.47	3605.3	7558.29	10090	14153.6	9184.16	11091.1	4805.12	4694.6	7508.42	5558.78	6976.1	6810.79	9679.02	4341.54	10217.9	5108.69	5738.85	3926.18	6534.12	10351	7271.38	6042.23	13123.4	11677.6
425	Unknown	0.644	13.28	41.99132:24 42.0465:128 42.99894:105 43.05424:513 43.26719:4 43.43856:9 43.51609:8 44.37397:8 44.97869:768 45.0148:563 45.97764:59 46.9939:19 48.07519:25 51.02269:47 52.54338:6 54.00853:32 54.9861:4 55.01724:53 55.97158:98 56.06104:414 57.20506:14 57.23266:24 57.29199:7 57.3408:28 57.38294:15 58.02778:410 58.03666:379 58.07479:95 59.03036:275 59.06958:65 60.036:27 60.24098:4 61.01009:108 62.99908…	1145.65	1270.94	997.211	836.579	835.655	632.423	1019.11	931.881	889.891	873.672	649.769	5959.78	7217.25	6231.95	4255.12	7576.87	6135.29	5032.03	5164.4	7737.89	6406.43	4314.35	1396.2	1017.49	7821.47	7041.97	5615.85	5454.58	762.137	3920.93	4464.74	1671.38	574.613	1162.65	805.898	1241.7	849.374	1125.2	990.402	991.682	7534.55	5074.3	1054.7	8765.79	7597.1
427	Unknown	0.919	27.02	41.0244:40 42.03371:66 44.17622:13 44.20417:5 44.9783:82 46.99427:11 47.1084:5 48.99115:67 50.27387:5 51.07009:5 51.7007:7 52.03005:367 53.02651:17 55.05334:81 56.82193:10 57.15866:5 58.61565:5 58.89418:6 60.00233:160 60.03632:579 61.04079:157 61.22268:3 62.9462:125 63.99378:57 65.03812:48 66.01887:108 66.04131:96 66.95779:52 67.05437:27 67.37499:15 68.0072:3 68.06256:28 68.77658:10 68.99452:31 6…	3239.19	5002.16	3420.7	4198.39	4515.25	3561.52	4026.95	5741.08	4660.41	5674.49	4007.71	4780.34	8715.38	6445.86	3852.79	4836.18	7978.39	6476.44	6036.27	5401.81	6178.16	5620.06	5746.83	5447.06	7202.7	8476	6601.24	5402.06	3288.83	5256.21	4907.41	4956.96	4481.62	5968.24	4211.96	6265.71	4043.63	5151.74	5265.99	6174.27	7379.04	5399.56	4959.12	8023.45	8122.34
428	Unknown	0.881	157.8	40.0179:132 41.99131:126 44.98796:81 45.01545:468 45.99305:61 46.99466:240 47.966:45 48.99023:70 50.01558:80 51.02386:102 52.01761:191 52.03039:107 54.99949:95 56.00679:101 58.99404:167 61.01052:430 62.94383:48 63.00565:84 63.95951:40 64.95946:28 66.04382:70 68.99396:59 69.03344:60 70.01:86 70.02267:122 71.98928:65 72.03838:174 73.1667:37 73.17529:44 73.23901:36 73.30817:27 73.3467:30 76.94118:40…	35526.2	64456	29854.2	14481.3	25246.4	19700.5	24822.2	24399	12591	36325.4	19818.8	102469	230481	178454	85029.4	193436	115242	158361	178093	166923	108107	85634.1	38225	34282.8	185907	171260	165266	138513	9528.14	160143	139204	66005.9	31732.9	67583.2	25743.2	50341.8	16042.8	17109.9	33873.1	36637.7	209091	145519	16915.7	342249	270961
432	Unknown	0.852	15.21	41.03845:220 43.05394:94 43.14498:6 44.18024:14 44.97884:90 45.01528:1143 45.75309:7 45.9861:119 46.01418:17 46.37293:14 46.99461:81 47.9939:130 48.07441:26 48.99037:25 49.1548:37 50.01458:17 50.15051:6 51.02256:408 54.04503:251 55.01712:124 55.05109:188 55.20686:14 56.02482:165 56.06117:109 56.86036:11 57.31493:15 57.761:9 57.91542:7 58.02817:461 58.0729:161 58.1085:13 58.86474:16 59.01836:126 5…	1956.37	1982.98	5646.31	1613.06	2130.97	35168.4	3256.23	25172.2	1424.18	2143.66	1157.72	1750.28	2229.46	1886.51	10266.6	1826.17	1335.68	1247.77	2603.43	2752.64	2312.36	1674.57	8421.74	2167.99	3203.27	4901.35	3515.74	1697.04	1305.78	1280.11	1821.08	1788.67	1593.97	2304.73	2216.66	2242.81	1238.27	1342.69	2140.76	1905.11	1765.61	1668.66	1486.6	2299.14	1854.12
433	Thymine	0.859	23.42	41.20586:17 41.99188:216 42.04654:133 43.20202:42 43.98911:247 44.04857:16 45.11276:14 45.99631:507 46.99432:446 47.0125:159 49.08168:76 50.01473:59 54.03391:474 56.81348:59 57.17438:13 58.02325:896 58.0278:53 58.03654:19 58.13072:56 59.03126:1501 59.06018:118 59.19479:19 59.96518:29 60.00177:155 60.0372:880 61.05787:94 61.99676:118 62.94361:179 64.96025:176 65.92897:51 66.02104:216 66.04559:326 …	3064.06	4210.39	3202.04	3080.84	3413.17	3005.87	3061.8	4313.91	3668.44	4044.57	2675.75	3840.27	6595.35	4429.15	3345.03	4120.44	4615.15	4554.02	4443.53	4485.62	4581.85	4845.16	4120.35	3856.89	5226	5229.66	4745.02	4451.93	2282.97	3687.21	3825.73	3841.39	2988.45	3759.62	3501.98	3931.27	2889.32	4614.94	4332.18	4207.8	4779.77	4056.99	3769.94	5655.88	6669.83
434	Unknown	0.904	83.16	41.03872:169 42.04612:187 43.05402:311 43.98891:599 44.00773:319 44.04942:46 44.97869:402 45.01521:1196 45.03391:27 45.68559:28 45.98538:98 46.05814:52 46.9742:84 46.99454:244 47.21767:11 47.98197:309 48.01116:213 48.07429:75 48.991:144 50.01471:23 51.02356:279 53.03308:91 54.04637:109 55.16358:16 56.06067:291 57.10517:31 57.276:14 57.94859:10 58.03499:754 58.07276:156 58.36112:14 58.61046:11 58.…	10832.7	14566.2	10150.4	9613.59	12637	12189	12062.3	16421.4	10756.8	14048.3	11183.6	11599.8	19225.3	14020.4	11909.2	12336.5	16427.5	15320.3	12958.7	15964	15348.2	12352.3	17200.6	16132.2	17923.8	17393.3	17867	12690.3	8985.74	10932.9	10939.3	13102	10027.1	15199.4	12420	15953.6	10432.5	13042.6	12790.4	14307.9	14844.4	12889.5	12114.8	17494.2	19535.3
435	Unknown	0.644	8.94	41.03854:41 42.04545:221 42.1148:6 42.24322:10 43.9266:15 44.00724:62 44.26678:8 44.70682:10 45.01555:656 45.12372:3 45.20091:26 46.01997:27 48.14804:15 50.01461:153 51.06296:25 52.00471:175 52.03062:359 53.03951:182 53.30071:3 54.04608:107 55.17176:14 56.04865:185 56.14339:24 56.36945:10 57.97909:51 58.03673:47 58.52578:7 58.99436:227 59.03043:953 59.39074:11 61.76742:8 61.94686:128 62.01538:244…	1078.45	1747.02	976.923	557.659	555.094	524.954	578.295	565.142	473.613	1170.89	478.165	792.782	1379.46	503.042	600.539	2637.8	493.755	612.663	1221.77	866.476	1621.27	1101.83	907.11	1038.29	1348.58	1152.57	1322.82	1478.45	265.162	745.628	442.817	2247.3	619.524	1583.28	773.014	1568.09	389.873	858.576	1563.25	932.908	1904.75	1111.38	518.857	2727.68	2413.33
441	Unknown	0.807	32.85	42.99963:203 43.98887:159 44.0055:207 44.97851:80 45.30424:7 46.05898:201 46.66988:9 48.01119:16 48.9897:97 49.08133:82 50.01485:159 50.99588:49 51.02317:26 52.01841:73 52.746:10 53.93954:5 55.01765:52 56.06207:50 56.12795:5 58.99352:158 59.13083:7 59.19905:7 59.49186:9 61.08375:10 61.94797:55 63.01566:67 64.95953:158 65.0383:34 66.04356:123 68.14181:5 69.97287:71 70.02257:72 72.20855:4 73.11921:…	3835.64	3627.74	3618.26	3110.23	3174.41	2526.05	3514.46	3001.65	2751.71	3528.31	3033.44	3854.52	4138.19	3703.12	3173.68	3920.7	5208.41	2870.29	4435.65	3823.39	3559.79	4214.66	3524.95	3233.57	3452.32	3847.94	3466.36	4390.52	2820.85	3188.13	3069.52	4095.27	2400.96	4107.4	3652.63	4998.48	2392.87	2658.89	4752.41	3739.6	3913.35	3135.95	2959.37	5393.68	4455.53
442	Unknown	0.126	18.42	41.00021:15 41.03879:289 42.37108:4 43.00057:120 43.47054:5 44.0256:89 44.14294:22 44.97892:472 45.01536:406 45.24395:6 45.7763:14 45.99348:121 46.99452:50 47.97562:133 49.23099:4 50.08668:86 50.12765:26 52.02999:648 52.19848:6 52.98322:87 53.03817:102 54.04516:22 54.9988:439 55.50915:62 55.83512:12 56.02437:197 56.06124:431 57.09064:32 57.1839:21 57.58411:8 57.82537:17 58.07213:192 58.16118:5 58…	1307.36	1338.27	1542.88	1246.12	1566.72	1598.59	1402.9	1366.72	813.828	1321.58	1682.6	1261.87	1533.06	1576.53	1146.33	1544.6	2481.05	1716.2	1458.73	1573.87	1719.16	1665.26	1407.92	1126.81	1710.34	1798.73	1479.4	1717.22	755.115	1357.59	1268.35	1227.29	995.239	1268.96	1603.08	1492.67	1005.48	1199.07	2013.47	1676.19	1756.31	1054.18	971.588	1572.54	1445.45
447	aspartate minor	0.674	14.64	40.03049:13 42.04707:275 43.00012:168 43.05455:180 43.9889:144 44.00645:329 44.05767:34 44.97916:18 45.01498:1071 45.05536:51 45.97932:81 46.01876:28 46.06288:50 46.99449:535 50.01442:357 51.0228:121 52.03055:146 54.25778:37 55.05343:117 55.19461:19 57.1993:10 58.42416:15 58.90486:13 59.06707:54 59.99472:86 60.02629:111 61.00964:232 61.94787:80 61.98162:137 63.00795:22 63.02334:13 65.96043:28 65.…	1066.35	5396.43	1072.5	716.914	648.504	829.676	1744.36	1314.95	1323.81	666.69	1133.56	1794.91	3670.86	1715.18	668.145	3744.29	2127.41	1870.63	1211.54	2529.82	5000.95	1076.58	2781.17	4349	5432.93	3763.14	3458.8	2043.28	507.67	1785.43	1562.45	4922.81	858.482	4766.1	810.624	12385.6	1129.03	4709.15	1670.17	1152.31	6246.12	1406.9	1349.07	7542.29	6458.76
456	Unknown	0.711	6.59	40.01819:30 41.00203:47 41.03797:358 41.99133:143 42.99897:92 43.05378:793 43.15316:5 43.98864:186 44.00806:61 44.05676:38 45.01508:196 45.03379:20 45.7546:11 46.96806:53 47.99367:17 48.98846:23 51.6317:1 52.9852:32 53.03793:244 53.34827:2 54.01044:3 54.72088:2 55.01796:42 55.49635:2 56.02226:3 56.0613:49 56.10728:3 57.2249:20 57.5494:10 57.90531:4 58.0736:99 58.10506:9 58.5029:39 59.00358:108 59…	1822.4	4907.53	2240.92	2843.28	1967.46	2233.13	2403.68	3162.53	2303.05	3518.57	2281.31	2684.38	4991.36	2891.52	1757.96	4856.04	3712.59	2796.39	3422.88	3751.01	5389.22	3453.92	4171.14	4307.46	5271.15	4908.8	4648.71	2840.7	1329.1	2795.94	2804.97	3694.82	2203.26	4302.03	2258.9	4820.51	1843.14	4229.62	3669.6	3048.77	5730.11	2728.69	2969.27	6410.4	6899.78
460	Unknown	0.378	12.42	40.8136:14 41.00118:28 41.03833:22 42.03371:300 42.27124:16 42.99948:429 43.05403:1646 43.09605:72 43.20845:57 43.26396:70 43.29071:14 43.32317:10 43.98893:397 44.05593:82 44.55073:8 44.97905:833 45.01515:360 45.78557:17 46.99456:802 47.01169:133 47.07715:12 47.83528:7 48.99411:76 52.02969:644 54.16285:4 54.99952:131 55.01768:256 55.87941:9 55.97055:67 56.09121:3 56.5683:18 57.08582:72 57.10468:3…	830.284	1838.31	1197.86	326.065	1312.39	773.79	1006.86	693.79	375.14	1268.37	736.145	649.569	1139.24	1526.62	808.08	628.442	976.695	846.554	1057.64	1337.12	805.634	1444.42	1245.16	865.79	1261.39	1243.83	958.538	888.389	258.256	705.181	907.888	2611.51	970.633	1822.27	1163.04	1757.08	486.147	115.945	949.581	1906.05	1175.35	997.607	467.932	1426.91	1214.88
462	Unknown	0.726	62.79	41.03802:422 41.44211:14 42.0424:101 43.05376:764 43.40506:15 43.9889:355 44.00606:273 44.97912:168 45.01484:1379 45.13765:17 45.30038:16 45.97748:76 46.01415:15 46.97465:90 47.01165:42 47.99972:41 50.0154:91 51.02296:161 52.01727:285 52.02993:1100 53.03742:29 53.15757:13 54.92583:12 55.05394:631 56.02532:179 56.06162:57 56.51696:22 57.30127:37 57.79672:18 57.92228:15 58.02289:432 58.07312:123 58…	15265.1	3976.92	13706.5	6668.69	13576.7	7393.34	4985.4	13526.9	7263.09	14911.4	13194.8	560.024	976.975	653.136	539.396	501.578	672.88	1045.12	456.492	158.892	523.872	231.48	9236.09	8252.82	575.396	695.981	576.663	448.169	10618.1	478.771	613.887	1899.43	10040	3585.27	14472.8	3367.26	9319.37	9221.14	7553.95	14524.3	763.84	648.244	8665.58	549.15	716.212
465	3-aminoisobutyric acid	0.874	39.57	46.99439:333 50.01444:253 51.0219:191 52.9833:109 54.00959:45 55.0539:119 56.00042:108 58.07286:104 58.99501:177 59.03044:979 60.01891:84 60.03314:253 61.94677:47 63.02313:109 63.95946:27 64.0192:52 65.03722:51 65.95599:24 66.04713:36 68.99415:399 69.95666:73 70.07721:37 70.51636:40 72.0185:393 73.11571:60 73.33441:35 75.76351:31 75.99723:46 76.96555:130 77.00468:60 77.5426:37 77.96922:41 81.0688…	7144.05	16285.7	7293.76	8986.98	6654.48	5121.84	8465.49	8135.02	9640.04	12014.7	6797.38	9863.99	33689.2	15320.5	6541.3	20122.8	14139.3	11487.3	15589.4	11115.9	22958.1	16635.3	14191.3	11229.5	24398.5	21287.7	20605.3	13542.3	2637.39	9466.83	12331	16725.6	6894.69	13246.2	6285.19	18028.5	6012.86	9071.26	16019.2	11464.2	26141.1	13670.7	10721.9	22795.8	29899.1
467	Unknown	0.904	289.43	41.03814:346 43.9886:249 45.01492:2801 45.9849:173 46.05963:49 46.99436:117 47.99486:368 48.07349:63 48.99044:184 50.01368:128 51.02237:76 52.0298:960 52.9832:182 53.98914:71 56.02458:152 58.02343:956 58.99498:295 59.03068:527 59.05722:100 60.03686:2501 60.07439:49 61.02779:78 62.03432:240 63.94398:49 66.02:183 66.95776:67 67.05349:173 68.0257:1440 68.06084:90 69.97391:67 71.94889:64 71.98898:62 …	41816.9	46626.2	46700.2	39576.1	38563.1	27913.5	40952.4	39883	30998.2	40396.5	39718	40748.1	57473.2	50351.6	38973.9	66629.9	39413	36459.6	40983.8	53452.8	45396.3	57279.4	43010.3	43814.1	50929.1	51084.2	46309	53335.8	30047.6	35503	34751.6	44035.9	26972	53961.6	43374.2	52721.2	27993.6	43865.6	59425.6	48601.1	84648.5	37300.9	34065.6	78046.4	64324.9
468	Unknown	0.889	11.64	40.02977:90 43.0539:346 43.09986:6 43.22121:19 44.23579:8 45.02844:75 45.08475:99 45.24285:9 45.85694:9 46.05896:304 46.21302:12 46.99427:618 47.07879:50 54.04658:117 54.99906:329 55.05346:103 55.45993:12 56.3235:13 58.02771:1636 58.03643:108 58.33011:17 58.99342:307 59.03058:1249 59.03916:140 60.13973:11 60.19016:48 60.52012:11 60.59412:12 60.77614:21 60.96128:10 61.03558:123 61.19923:11 62.0172…	2034.63	3516.93	1667.05	1882.63	2500	1669.94	2628.7	2760.12	1715.64	2614.33	3054.8	2035.11	3260.99	2800.6	2104.84	2753.74	4168.18	3496.7	2125.07	2335.65	2983.94	2205.78	3514.23	3502.09	3208	3267.12	3944.67	2401.68	2418.46	3701.03	1865.74	2866.53	2588.89	3692.18	2571.37	4388.25	2738.61	2646.83	2293.09	3472.19	3277.33	2737.91	2792.14	4341.02	4592.17
469	Unknown	0.904	3450.85	42.9994:179 43.98883:1423 44.0068:189 44.97878:309 45.01501:4689 45.03387:97 45.98415:103 46.01442:629 46.99414:706 48.00092:478 50.01454:149 51.02261:169 52.03062:1122 53.03785:104 54.01064:89 54.99939:247 56.06132:110 58.02299:1547 59.0307:1716 60.00264:131 60.03687:6511 60.04989:221 61.04105:529 62.03378:672 63.99594:122 66.02078:454 67.05331:153 68.06113:199 69.97472:234 71.98893:249 72.03822…	214295	353919	159224	201653	263956	218686	251308	329213	244294	251671	332853	234826	381884	277368	201336	282006	434870	345842	255568	391776	267326	210502	416172	357752	436758	332673	393241	242286	240239	367244	263351	361455	248139	428785	307300	439999	277704	311020	286774	352907	344602	318739	280861	458848	515033
470	Unknown	0.889	116.56	42.00662:106 42.03349:79 42.21354:4 43.52235:7 44.12244:20 44.16095:22 44.65295:7 45.10442:17 45.52589:74 45.98432:384 46.01391:682 46.05831:1091 46.15885:8 47.07986:6 48.01965:19 48.07398:5 50.05994:14 50.99632:120 51.05174:9 52.05259:15 52.23629:19 54.31984:5 55.0537:100 56.13404:3 56.27013:6 56.54765:8 57.42474:19 57.83078:9 58.00641:90 58.43896:6 58.77046:25 58.96741:62 59.04388:42 59.24913:2…	7582.22	10584.5	6668.34	7551.74	10714	9137.52	9458.16	12401.7	8068.94	9393.94	12852.7	7015.98	14947.4	10550.6	8194.46	9933.66	16264.4	12300.7	8569.14	10052.5	10543.5	8778.72	16106.9	13371.9	15952.6	11928.3	14294.8	9133.87	9214.81	12072.3	9441.8	13373.4	8871.77	15107.9	10890.8	14493.7	9655.33	9863.17	9430.71	13953.3	12575.2	10689.8	10070.5	15505.1	16774.3
471	Citramalic acid	0.844	680.65	41.03843:6207 42.04646:760 43.01769:19484 43.05397:2252 43.98905:6119 44.00789:4445 44.97889:3337 45.01535:29502 46.01477:1614 46.99446:7380 47.01199:3906 50.01518:601 51.02287:335 52.03059:654 52.9838:496 55.00007:1734 55.05382:2503 56.00708:476 56.01183:255 58.02287:3868 58.99407:1419 59.03093:7208 60.00185:836 61.01012:5690 61.02731:264 61.99305:361 63.02319:374 66.02074:1208 67.01759:2767 68.…	95818	158922	111082	16482	129536	69881	125689	48963.9	16689.9	160716	57930.7	30279.6	112713	66232.4	21373.9	17442.2	45737.5	23283.5	85808.2	79130.7	161373	105677	139949	115919	82845.6	71306	70605.9	60858.1	7763.19	9906.56	33279.1	137519	78873	135097	99958.8	413010	20315.2	645.345	96053.2	181191	81445.2	45428.1	55547.7	150675	50281
473	Unknown	0.867	55.61	41.99091:146 42.99954:1802 43.18596:11 43.98872:410 45.01503:1916 45.14159:12 45.20174:54 45.66698:13 46.01444:249 46.24675:12 46.99451:2040 47.01191:195 47.5:30 47.6352:35 47.70116:12 47.79481:14 49.18707:7 50.0144:132 50.17477:13 51.02254:120 51.46569:16 52.01681:549 52.03037:1023 52.22528:11 52.80686:16 52.984:112 53.03812:946 53.08408:11 53.97881:77 54.2863:40 54.87454:14 55.24688:21 55.99475…	9623.05	15188.8	8238.33	4166.06	6618.06	5208.73	6390.2	6927.97	4018.3	10903.9	6522.41	24927.7	46955.9	36162.8	19826.7	37355.8	24972.6	33725.8	32912.1	35699.7	24066.5	20220	9947.86	8918.04	38881	36621.2	35376.1	30213.3	3513.8	28790.9	26743.3	14041.9	7732.61	16446.6	7725.5	11840.9	4836.54	1955.09	9162.72	7940.37	36558.8	28315.3	5081.42	53102.6	44443.4
474	Nicotinamide	0.881	1290.79	41.02669:296 43.98894:2139 44.97887:14966 45.01537:5870 45.97863:1417 46.01459:971 46.99462:18332 47.99448:699 48.99162:1717 49.00682:649 50.0148:4575 51.02261:14119 52.03036:2485 52.9835:1204 53.0382:1422 53.99124:639 54.9998:1197 55.01812:346 55.99485:2136 58.01024:1060 58.02313:2654 58.99458:1725 59.03107:2190 60.00234:2035 60.03474:427 61.0103:1961 63.00703:717 64.01793:616 64.96015:303 65.03…	185199	372388	187091	238380	120060	120032	209023	222728	183082	241628	190015	215196	496539	220885	135350	421035	211698	168580	265439	264593	415187	334923	305180	250822	392064	367896	349899	299000	50998.8	207143	181522	346988	159275	344960	187457	385415	94498.2	365403	346376	186644	496562	191002	183633	488981	567420
475	nicotinamide	0.622	8.41	42.0101:103 42.0459:318 42.9999:518 43.98898:454 44.97878:2798 46.99443:4901 48.99136:202 50.01514:1248 51.02257:5914 51.03638:144 51.04928:113 52.02996:1399 52.98383:596 53.02691:328 53.97944:82 54.99975:121 55.99569:131 56.02494:122 56.06202:1745 57.09792:186 58.02768:818 58.07256:755 58.9945:525 60.00202:551 61.01031:1655 62.00968:118 62.94543:100 63.02321:141 63.96065:79 64.01695:258 64.95934…	185193	372642	187098	238314	120033	120035	208985	222721	183076	241564	189958	215200	496538	220820	135437	421061	211659	168519	265609	264691	415497	335071	305150	250934	392137	367854	349946	299151	51488.2	207161	181426	347142	159187	344760	187436	385350	94540.2	365339	346398	186712	496668	190957	183588	488874	567157
478	Malic acid	0.867	15.44	41.06404:69 41.11693:45 43.07856:130 43.08396:107 43.10792:52 43.98887:1074 44.04947:2029 44.56643:15 44.83447:18 45.0152:4781 45.10792:16 46.96705:65 51.03722:35 51.05506:22 52.25914:26 52.34925:19 55.01744:3407 55.10295:183 55.18522:18 56.08368:99 57.16089:84 57.17165:56 57.22748:75 58.0787:73 59.03118:1470 59.13963:34 60.01986:214 60.03433:290 60.77191:34 61.02766:200 62.94467:158 63.92842:53 …	1203.73	3212.05	1108.2	1843.77	876.533	435.958	2199.43	1184.94	1004	1555.92	1221.41	1025.77	4025.78	1939.08	534.053	6389.64	883.751	730.819	5356.65	2142.26	4364.65	3022.63	2757.12	2303.04	4313.37	4809.38	3608.63	3146.17	383.781	1953.99	670.607	5220.56	592.144	3589.21	1273.93	6978.28	900.604	2356.99	6493.03	1312.31	5441.23	1135.63	1264.28	11707.5	7123.81
483	Unknown	0.748	111.08	40.0279:73 41.0382:1678 42.97426:182 43.98884:1196 44.97868:750 45.01504:1792 46.9945:1776 50.99692:375 52.50436:76 53.98655:53 55.00104:47 55.01746:125 56.0487:1171 58.02379:871 58.9943:296 60.00217:278 61.00985:1428 61.94562:50 62.01332:216 66.04443:253 68.02393:209 68.04787:658 68.99384:141 69.03263:55 73.32764:55 75.11872:50 75.16896:68 75.21346:88 75.72598:69 77.02122:886 78.04524:226 79.040…	52700.9	191710	49456	37729.4	54896.5	32057.8	91395.8	40626.4	30046.7	88559	38545.7	25930.5	81015.4	38291.6	15483.2	70073.9	33227.4	23657.5	38724.1	36583.8	96481.3	50323.9	88767.8	76345.3	66176.7	64658.5	55937.6	44938.9	13670.6	20319.4	23162.7	153621	36296.5	93496.6	41920	412107	22536.4	45728.2	158412	68458.2	98751.7	27345.4	27592	157072	139079
492	Unknown	0.548	11.73	41.03872:185 42.03428:147 43.01773:227 43.17404:5 43.76812:20 44.23789:9 44.97834:394 45.01518:750 45.15263:6 45.6017:2 45.72864:7 46.01417:33 46.01786:257 46.99476:343 47.12548:27 48.0122:154 48.07441:40 48.9895:79 51.02196:352 52.93113:10 53.03812:301 53.81708:13 53.97047:51 55.01727:441 55.05423:269 55.99626:142 56.04913:507 58.43928:8 58.99455:163 59.03106:930 59.30143:13 60.00232:176 60.2311…	3229.67	5177.18	2870.98	2472.91	1917.64	2392.87	3500.45	3824.89	2936.29	4756.02	2827.63	6186.01	22723.4	8081.37	3850.37	6291.96	11291.2	6758.78	9366.12	10260.9	11966.5	8507.1	4603.54	4496.99	16053.6	12562.2	11515.5	7930.93	2745.49	5612.96	5894.52	4415.55	3316.86	5195.77	2878.23	5159.47	1852.49	4593.98	3603.66	4635.53	13714.4	9894.96	4263.42	12161.1	15717.1
498	Aspartic acid	0.896	171.8	41.03741:390 41.14368:21 43.0002:368 43.83968:33 43.98915:73 44.05777:28 44.9795:156 45.01524:1245 45.97752:157 46.01382:47 46.99458:583 52.98332:77 54.03331:79 55.01787:82 56.0487:287 56.06192:73 57.09096:89 57.5158:26 58.02782:282 58.07324:172 58.99534:206 59.03117:991 60.02432:317 60.0741:138 61.01001:2035 61.03605:49 62.01453:83 62.94454:112 62.98916:20 65.03819:31 65.52808:76 66.0186:26 66.9…	12053.3	27244.8	10469.9	21978.3	8282.32	5413.38	26624.3	10658.2	7882.54	17335.6	6646.86	13534.9	28606.7	19473.7	10318.5	58895.1	4962.22	9019.05	15622.7	13031.7	17303.6	21289.8	27354.3	9611.03	13278.5	22485.9	21338.1	24139.3	11057.8	20213.2	11947.8	37936.5	7100.84	13763	10204.1	40396.4	9087.38	77811.4	42259.3	8399.83	33365.3	10585.5	8494.48	29340.7	67357.5
499	Methionine	0.874	92.1	40.98342:86 42.03316:110 43.05353:148 44.04907:193 44.97872:228 45.98689:162 46.99441:755 48.07435:102 49.00699:41 50.015:374 54.03342:135 54.99945:88 55.99532:108 56.02529:73 56.04948:1269 57.98707:46 58.02282:915 58.07231:75 58.99367:352 60.02638:142 60.0742:1526 61.01058:5261 61.07832:67 61.51562:70 62.01401:194 62.67246:36 63.00645:354 66.02164:727 66.95747:71 69.0359:169 70.10262:223 73.1892…	15297.4	14256	8943.89	37597.4	5948.4	9232.83	15199.5	20835.7	20498	32848.2	9952.01	12995.9	24847.8	15467.9	10345.9	30597.3	2020.22	6317	18545.6	9000.32	10425.8	16901.5	23115.6	6729.79	7420.3	12116.8	13786.1	19946.3	34742.4	17187.7	6000.85	18916.1	7491.88	13597.4	10017	10720.4	19523.1	26421.7	41405.4	4904.39	22356.7	9369.86	12173	17307.5	33448.7
501	Pyroglutamic acid	0.956	1789.24	41.03863:3485 42.99978:5288 44.00761:5592 44.97892:7297 45.01544:42817 46.01514:3268 46.99475:6953 47.01255:2272 52.00481:1822 54.99971:3400 55.01759:5438 56.04931:5966 58.02338:17537 58.99394:3459 59.03108:16526 61.01044:5876 66.02062:2134 67.04114:4614 68.04906:2118 69.01566:2186 69.97426:1809 70.01068:3544 70.02302:6931 71.0853:2988 71.98943:1994 72.03871:16007 76.02632:2958 77.02234:2033 80.0…	221650	1605703	227099	111948	205973	106649	637388	118169	73919.1	427069	104338	174132	1115161	292203	82587.7	766805	353703	148777	421752	406844	1108493	560777	634105	623935	862987	756415	667056	523518	38049.7	147976	182773	1377442	179590	631910	154305	3137118	66652.1	419786	1241152	295894	1498837	273885	128714	1783076	1750987
508	Unknown	0.756	23.44	41.03919:61 42.03267:97 43.01753:1970 43.05373:4149 44.00716:262 44.05052:126 44.10128:66 44.85128:16 44.97852:283 45.01508:427 45.97846:19 46.01602:69 46.99408:370 47.24709:14 50.98605:109 51.02231:70 52.03025:336 52.98336:271 53.03766:87 54.04468:143 56.01266:208 56.0607:19 57.14961:25 57.45763:16 58.02224:333 58.99487:45 59.03022:575 60.01345:162 60.02513:194 60.02991:260 61.01009:355 61.94682…	9000.91	12543.6	11116	683.049	13422.1	10999.2	5245.18	7139.15	1351.63	12403.7	7354.05	3406.19	7791.5	3861.88	3648.86	6703.93	4574.19	4701.38	5010.65	6670.53	6116.35	3992.14	8591.31	6844.6	7766.32	6572.37	5371.19	4656.73	3525.89	4061.2	3342.48	13144	13359.3	21434.8	17821.6	9265.98	1830.01	527.108	6465.8	18179.4	7845.37	4077.24	9535.05	10743.9	7842.99
509	Unknown	0.837	219.85	40.98433:43 41.72399:11 41.9914:48 42.09528:14 42.20095:5 42.3845:7 42.99949:463 43.01762:746 43.06441:32 43.10753:29 43.47979:4 43.989:603 44.04493:196 44.97857:145 45.01444:1398 45.12867:15 45.25125:8 46.01416:58 46.96709:220 46.99447:447 47.129:5 47.19641:13 47.62576:14 47.82987:6 49.52489:74 51.23103:5 52.03029:114 52.71914:12 52.9847:159 53.14523:24 53.97812:33 54.35958:25 54.98731:88 55.017…	6963.73	8270.11	6621.48	1226.3	9262.47	4921.71	7209.35	2875.3	1066.69	10586.6	4144.81	17314.2	43609.2	34256.7	12304.8	10191.4	26174.3	17950.1	43206.1	54788	53441.5	58724	7504.06	7478.34	36310.7	31322.4	31152.4	27376.5	513.875	6219.53	24973.1	7495.35	5073.34	7159.57	7592.63	16947.5	1399.09	158.63	5437.46	14342.3	35025.4	27441.5	5311.31	46831.5	29748.7
513	Unknown	0.859	33.35	40.02972:109 41.03787:66 42.0335:98 42.04616:445 42.19211:8 42.25422:14 42.99956:262 43.05388:1085 43.16902:19 43.49327:9 43.98858:562 44.05868:121 44.19566:3 44.97839:138 45.05694:79 45.09702:9 45.31902:18 46.01474:35 46.12007:12 47.9671:24 52.06041:12 52.50529:49 52.68992:8 52.98334:71 54.00955:92 55.01782:298 55.05346:175 55.18638:16 56.02626:57 56.0497:92 57.08696:15 57.38269:24 57.5263:19 57…	5441.33	7232.5	3957.94	9734.79	4074.82	6398.24	3228.63	6692.55	5316.05	7678.36	6228.7	5836.84	7595.84	9580.79	9315.56	8479.35	8729.81	4944.93	12776.9	12441.8	7520.62	5534.3	9225.7	7436.67	10517.3	10204.3	9602.53	7227.69	7862.99	6346.9	4498.28	5650.66	5436.59	6372.16	7404.13	9663.87	5921.64	16079.2	7776.79	6962.26	8288.02	9224.52	4782.85	10644.9	9318.52
517	Unknown	0.904	19.09	41.18362:4 43.26029:7 43.70314:5 43.98866:83 44.00714:1333 44.16156:10 44.27918:20 44.97905:34 45.03339:314 45.11223:10 47.10538:22 47.20892:10 49.00585:173 49.07832:33 50.01442:211 51.02269:309 52.02953:288 52.17833:6 52.98399:63 54.10101:6 54.14663:3 54.32519:4 55.01669:213 55.84958:3 56.00578:81 57.45225:4 57.68271:9 57.72795:16 58.02753:184 58.71616:9 58.99493:265 59.42397:8 60.03456:198 60.9…	3444.26	7011.2	3268.73	3540.23	4261.66	3094.33	4787.11	3662.21	3168.77	5701.96	4638.4	3018.46	5727.51	5387.14	4267.41	5742.98	4363.92	4291.07	4426.17	3690.05	6217.36	4252.47	3998.09	4996.72	6014.66	4799.53	4821.61	4774	2774.03	2849.42	3099.99	3142.52	3949.72	3173.43	4039.01	4658.46	2442.25	4049.45	5341.39	3550.38	5244.05	3437.11	3120.56	5562.64	5397.18
524	Unknown	0.948	88.69	41.03803:301 42.03257:215 42.9996:980 43.05419:920 43.1709:28 43.98872:1086 44.17787:11 44.49353:13 46.0149:250 46.33526:6 47.05984:40 47.08823:52 50.01362:415 50.19736:7 51.94093:44 52.03024:341 52.18632:8 52.50752:35 54.04567:633 54.99908:111 55.05371:704 55.1246:19 55.15946:33 55.77419:14 55.99319:127 56.04874:368 56.06146:228 56.36828:18 57.14131:29 57.22312:15 57.30096:14 57.8737:9 58.02815:…	7214.72	18013.1	6739.18	3302.28	6382.34	4584.97	7808.81	3373.15	1669.13	9402.17	3519	3345.29	7841.29	1890.54	1459.77	19367.1	1717.96	943.084	5020.49	3873.61	10092.3	7248.31	8511.44	8312.94	8649.7	8426.24	8247.41	7603.58	700.122	5105.9	1413.69	21264	4752.02	16270.8	8741.4	19453.9	1194.23	4331.88	14605.6	8628.6	12607.9	4874.39	3626.21	22750.7	15899
525	6-Hydroxynicotinic acid	0.793	9.33	41.03848:57 42.97166:17 43.05437:998 43.25668:15 44.00746:750 44.05766:59 45.06101:26 45.97846:106 46.99454:579 47.05405:51 47.99456:132 51.02271:378 52.98527:46 53.025:131 53.03767:481 53.9912:151 54.99957:182 55.99545:98 56.02617:67 56.06143:380 57.13497:21 57.59988:16 58.02342:112 58.07321:122 58.11924:43 58.14969:39 58.9942:221 63.95296:16 64.03027:48 64.96038:173 65.51:115 65.96066:26 66.021…	6146.41	7617.43	5744.64	3937.61	3930.02	3618.78	6328.95	4004.84	2865.79	5582.6	5123.16	5743.33	12128.8	6796.55	3834.09	7545.02	5168.03	5098.9	7168.77	5415.21	8794.12	4807.02	6099.66	5842.14	9065.38	7850.41	7854.34	6542.93	1830.11	4957.95	4580.41	6685.61	5430.06	7215.06	3648.45	8924.73	2095.84	6610.38	7290.49	6485.95	11717	5575.91	4002.1	13166	12663.8
528	Xylonolactone	0.881	112.09	41.03874:432 42.99956:387 44.00783:421 45.0155:2854 46.99429:586 47.01207:725 50.01469:279 56.01244:378 58.99451:532 59.03083:2339 60.00208:189 60.02975:197 65.03749:275 66.02068:416 66.04153:140 68.99517:246 69.03313:383 70.02282:541 71.08519:631 71.98758:157 72.02405:227 72.08835:495 77.02203:525 77.03825:365 77.11334:135 79.04093:1066 79.05306:521 79.07647:124 81.03249:167 83.04957:451 84.0924…	26225.6	49877.4	23276	28082.4	17664.4	14782.5	36761.8	19190.1	19969.4	46004.6	20002.8	70337.9	166414	80078.6	35068.6	112374	73829.3	49931.7	82005.7	68353.5	115844	91625.6	42343.9	35555.4	111177	99715.5	86346.6	72630.5	3661.03	39357	51059.2	48171	18183.8	41044.8	20457.4	54373.7	8897.71	35651.7	38076.3	35502	151397	63934.1	20371.9	149256	158967
529	2-hydroxyglutaric acid	0.881	104.95	41.03807:562 42.99966:447 43.05389:845 44.9791:571 45.01537:1046 45.03447:217 47.01138:176 47.99429:131 49.00735:207 52.03047:130 52.9841:170 53.03782:277 54.02167:143 54.03336:496 55.01775:3102 56.02028:102 56.02515:1500 58.01387:208 58.0751:239 58.99372:788 59.03093:842 60.00065:346 60.031:501 61.01027:1744 62.0085:125 62.94485:222 64.01756:114 64.95933:237 66.9567:144 67.00979:98 68.02493:163 …	57338.6	185849	54788.8	24644.2	70431.1	35703.1	63664.2	22825.1	18363.8	71322.3	22655.1	39307.8	54115.2	39904.9	22536	23098.3	46783.8	24073.1	36989.9	72288.6	145985	62298	83991.6	69714.2	62929.6	57754.6	54770.1	47207.5	16243.5	10687.7	26070.2	269718	41456.8	147114	64530.6	205433	20322.6	7114.85	118904	77059.2	110394	28370.1	31493.7	71279.8	81712
530	2-Oxoglutaric acid	0.578	56.35	41.03893:230 41.99157:306 42.04633:146 42.99974:1961 43.01862:93 43.98932:271 44.00723:1738 44.0182:1419 44.97909:3013 45.01541:16063 45.03359:176 45.99616:156 46.01498:1379 46.99455:3326 47.01241:442 47.0861:72 47.99402:278 49.00689:423 50.0151:236 50.99684:236 51.02272:606 52.00501:727 52.98433:244 53.02632:645 53.9973:191 54.03368:1761 54.99935:1112 55.01773:20907 55.10412:302 55.16872:66 55.1…	8087.57	34859.1	6881.38	2664.72	8235.27	3589.57	11932.8	2302.07	1889.52	13921.7	2817.77	1925.91	6299.48	4330.85	2087.72	1954.02	2234.27	1706.77	6925.24	4483.73	4379.61	3279.5	16148.9	13932.7	4003.09	3467.16	3844.65	3380.17	1672.25	841.891	1872.55	35324.5	5538.54	18317	5777.45	54968.2	2069.07	749.382	36438.4	12439.1	5715.22	6187.5	5251.38	7988.48	4949.23
531	2-Oxoglutaric acid; GC-EI-TOF; MS; n TMS; RT	0.83	22.33	41.03851:91 43.9891:2457 44.05668:161 44.97908:1322 45.01539:4800 45.05883:60 45.16946:52 45.19069:94 45.22072:79 45.33114:78 45.65704:52 46.01528:336 46.96727:290 46.99485:8233 47.01207:962 47.9935:543 48.99024:160 50.00157:116 51.02289:442 52.00524:1188 52.03054:986 52.50843:60 53.99759:749 54.03387:4606 55.01765:26793 55.10258:97 55.14158:124 55.22892:65 55.99606:846 56.02367:1341 56.04915:337…	8081.53	34866.6	6881.96	2665.18	8236.63	3589.96	11933.1	2302.29	1889.52	13924.2	2817.87	1925.92	6299.42	4330.9	2087.93	1954.28	2234.49	1706.88	6925.26	4483.76	4379.63	3279.47	16150	13933	4003.25	3467.32	3844.9	3380.12	1672.25	841.891	1872.55	35324.5	5538.54	18317	5777.45	54968.2	2069.07	749.382	36438.4	12438	5715.22	6187.5	5251.38	7988.48	4949.23
533	Unknown	0.156	26.57	41.03816:364 42.00981:288 42.03338:721 42.99944:1084 43.01703:280 43.05461:778 43.98867:734 44.00793:868 44.97874:625 45.01503:3802 46.01461:499 52.00546:241 56.01284:330 58.0229:805 58.99383:336 59.03085:1930 61.01003:298 65.00406:323 66.02085:502 67.01478:594 68.06163:242 69.01543:500 69.03294:423 70.0097:495 71.99005:502 72.03843:819 77.02158:570 83.03529:238 85.1005:466 86.00512:650 86.04151:…	24130.5	46201.1	28150.3	2071.81	29105.9	29624.8	18562.2	20023	1973.33	32303.9	23185.1	410.426	1309.53	969.834	446.667	344.775	472.163	986.621	883.104	597.184	1043.64	597.618	34017.9	21884.1	822.644	1227.59	948.883	676.309	3461.71	284.981	775.669	29502.7	31659.2	62599.7	42935.4	20558.2	4926.6	693.014	17695.5	44556.7	804.806	531.63	16592.4	1027.39	1112.1
534	Unknown	0.563	414.09	41.0379:166 42.00988:259 42.03368:2013 42.99953:801 43.05387:1830 43.98887:462 44.05762:121 44.97852:521 45.01508:2428 46.0147:433 46.99386:679 47.99863:166 49.00693:153 52.01678:193 52.02962:379 53.02691:227 53.98312:145 54.03273:384 56.01188:458 56.04943:570 58.02284:319 58.99484:329 59.03044:1295 59.06741:104 60.0028:73 60.03046:120 61.00993:194 61.99572:95 63.02241:319 64.95972:68 65.03744:14…	69826.9	155654	96021.3	5782.04	96958.2	97642.3	54923.6	60737.9	5399.33	102136	67155.9	960.04	2519.9	1675.62	650.468	844.063	873.878	1739.87	1420.2	1145	2024.03	1241.58	100970	66322.6	1892.01	2832.42	2137.05	1293.9	12406.8	801.769	1325.62	119425	121030	246721	150053	67975.1	17368.7	1657.87	52789.3	222980	1993.39	1374.77	53972.8	2502.87	2263.24
537	Unknown	0.926	52.14	41.23464:10 42.0092:15 42.04153:199 42.58094:8 42.99921:380 43.05398:694 43.9889:460 44.11556:10 44.49452:20 44.97926:390 45.01523:397 45.16656:16 45.54075:9 45.90847:8 45.99567:221 46.99399:765 47.28889:14 49.00671:204 50.01442:82 50.09941:19 51.24592:19 51.51247:57 52.00542:85 52.03096:820 54.00895:40 55.01725:244 55.30127:24 55.37141:16 55.99441:95 56.02446:166 56.26693:19 57.25392:14 57.77576…	9253.77	10604.1	6578.27	7068.48	10547.8	8400.86	8350.27	9744.63	9427.77	10255.5	10290.3	7875.64	12153.7	9824.94	7916.8	6749.66	9180.81	10556.9	9220.4	12106	7712.96	7264.6	11105.1	9703.92	10646.1	11163.3	9785.59	7719.74	10436	8254.55	8194.87	11158.7	9027.87	12454.9	10439.5	10738.3	10157.2	7420.61	8894.4	13014.1	9117.13	9298.23	10445.5	10984.6	10763
538	2-Isopropylmalic acid	0.881	430.6	41.03799:641 41.99044:66 42.04606:295 42.99937:347 43.01754:327 43.05411:1402 43.46708:37 44.05801:143 44.9784:164 45.01534:3283 46.01656:349 46.03562:49 46.99456:826 47.99443:58 53.02441:59 53.0382:249 54.01006:117 55.01786:154 55.05381:769 56.00712:265 58.0228:403 59.03103:1017 59.06526:52 60.00182:251 61.00979:398 64.9604:287 65.03748:201 66.51968:224 67.04054:150 67.05354:424 68.06223:365 68.…	27453.8	63836.2	31952.7	11312	34431.6	21260.4	25685.3	16228.2	10809.2	32044.6	17044.7	24295.2	44915.8	44745.1	21354.6	21214.8	35919.8	29907.2	42053.8	54903.2	35058.6	39584.2	35939	30366.2	37986.9	36474.2	35158.3	30141.7	6119.7	17071.2	30857.7	57517.7	26495.9	60787.2	29080.6	47863.6	10587.2	2923.47	27517.8	38716.6	38537.5	37743.5	16186.7	51911.1	36044.9
539	Unknown	0.919	20.34	41.03813:888 42.00829:126 42.04106:328 42.04658:276 42.99928:708 43.98873:99 44.00703:110 44.05852:101 45.01545:3062 45.03379:104 45.09589:69 45.99876:120 46.01424:360 46.99462:319 48.9916:200 53.0024:157 53.03854:334 55.96963:88 56.02755:67 57.52752:30 58.02833:707 58.99564:158 59.07058:171 59.11221:37 60.00158:81 60.03348:548 60.71169:25 62.00985:172 62.94356:118 63.00737:150 63.0726:62 65.0018…	27429.1	63713.1	31890.8	11284.3	34427.6	21268.8	25604.6	16187.4	10813.5	32031	16961.1	24228.5	44826.3	44654.4	21293.1	21275.2	35865.6	29857.1	41944.8	54705.9	34983	39493.2	35848.2	30297.2	37791.6	36396.7	34972.7	30026.3	6159.87	17212.8	30887.7	57505.9	26641.6	60838.4	29034	47638.3	10722.5	2921.08	27466.6	38732.9	38712.5	37784	16283.3	51760.4	35953.8
540	Glucose-1-phosphate	0.326	18.77	45.01542:1414 47.01187:155 51.02348:159 52.00557:858 52.03072:600 53.03859:1112 54.04517:162 55.01774:343 55.05368:1702 56.02534:1802 64.96055:203 65.03822:395 66.02003:416 67.05402:991 68.99382:153 69.03237:134 73.82125:119 76.02698:135 76.0312:122 78.04603:236 79.04118:904 79.05355:970 79.07313:397 80.06031:384 81.03281:6288 81.06839:210 82.0377:449 83.03204:260 83.04864:1420 89.04135:545 93.03…	304903	432534	288260	319740	387252	329477	325098	395710	320490	449283	386713	375867	622248	468421	366234	586928	477826	521314	387948	442141	367111	303520	392107	351730	536989	516904	510802	412105	181896	398060	353574	329816	244715	440897	347015	334259	218635	315777	431997	349057	416770	362058	271480	467446	693478
549	Unknown	0.444	99.99	40.02964:50 42.99965:733 43.0535:265 43.98902:553 44.0074:235 44.97862:891 45.01514:6059 45.03217:173 46.01468:393 46.9946:373 47.01278:260 48.98818:169 51.0219:144 52.03086:142 52.98381:249 53.02618:427 53.03934:233 53.97882:92 54.0452:64 55.01699:544 55.05364:334 56.02427:109 56.05844:75 58.0228:1329 58.06224:261 58.9944:594 59.03057:3491 60.00187:129 60.02977:331 61.00938:599 62.01248:55 62.98…	39350.4	31764.6	34770.4	911.333	73313.3	23248.3	14288.5	11438.6	1250.8	39203.7	16039.4	677.379	513.279	561.948	306.849	412.854	769.492	829.512	719.57	432.72	423.129	403.679	24690.7	17630	488.751	576.137	513.735	292.017	2531.87	562.506	1028.87	41699.6	43213	69985.6	34888.3	14759.1	2818.83	452.276	11928	62933	605.561	372.497	28515.7	906.511	919.652
552	Unknown	0.807	99.85	42.00931:245 44.00714:1467 44.04941:446 44.9786:5287 45.11084:67 45.97869:484 46.01439:1426 47.9757:398 50.01488:98 53.98003:282 54.01041:329 54.04599:857 55.01825:2135 55.97:146 56.02566:528 58.99424:2166 59.07422:74 60.0022:1523 60.03:1006 61.02808:932 61.94675:79 62.98902:513 63.02298:1301 64.961:174 66.51947:172 68.99546:215 69.07073:275 69.52604:82 70.0116:169 70.02268:585 72.88771:86 73.309…	28989.9	55340.9	28652.1	30977.7	34957.4	31173.1	32587.1	37480.8	27799.6	42555.4	33080.9	37856.7	67913.6	43850	32378.5	68728.1	44066.8	48728.6	38866.4	39301	43458.4	34844.1	44290.8	37087.1	55181.7	58031.1	52608.3	45051.2	12208.7	38363	33999.1	39474.5	23593.8	49453.7	36389.3	44081.4	18142	21800.7	47288.9	36551.1	50385.3	34287.7	21640.5	58378.8	76689.4
553	Unknown	0.933	3591.28	41.03848:1925 41.99264:1012 43.98898:5277 44.00745:5039 44.04927:6359 44.97895:7025 45.97877:953 46.01488:1994 54.04614:1267 62.0101:1128 62.99957:763 65.01458:1110 70.06452:822 77.00495:15293 77.03755:753 78.0337:899 78.04623:1114 78.98393:3701 79.04099:1497 79.05269:1056 87.02583:2220 89.04155:1837 90.9391:3391 97.07509:844 97.98795:4431 98.99639:1040 99.02491:3088 101.04106:8311 101.99407:767 …	527223	1055547	512043	560662	618355	559960	579567	673202	522643	803052	613050	685002	1274187	781630	592668	1321215	803031	946052	692557	709160	766407	674298	795897	664319	1057131	1040900	980278	829540	207993	750862	658012	695625	438375	958917	706355	830778	303713	395883	925070	646738	1015677	641153	404044	1086336	1449801
554	21683 glycerol-1-phosphate byproduct by Kohei Takeuchi 02-2014	0.563	135	42.99962:5515 44.00739:4350 44.97876:8227 45.01528:26885 46.01454:1797 46.96824:1439 46.9944:8805 54.04649:1123 58.02301:2993 58.99428:2832 59.03079:20575 59.99357:984 61.00988:5272 61.02763:1220 62.00972:1057 62.98979:1184 63.00658:2118 70.02298:2600 72.0388:10016 76.02602:3162 77.00486:17663 78.0038:1326 78.98359:4939 79.00732:1025 79.04114:1205 83.03144:1060 87.02602:3827 88.95016:1510 88.9785…	527181	1055574	512084	561133	618920	560061	580202	673694	522667	803504	613219	685145	1275805	782158	592776	1321013	803032	947605	692720	709489	766932	674307	796193	664596	1057663	1041518	980470	830094	207937	751182	658167	696197	438697	959386	706963	831559	303710	396031	924444	647321	1016462	641286	404078	1088190	1450402
555	Alanylalanine_1	0.104	340.9	42.99961:4974 43.01782:329 43.98922:1047 44.04926:3191 45.01534:27006 46.01448:1238 46.99473:4015 47.01245:1416 47.99298:318 52.98391:413 53.99155:490 54.99935:454 55.99488:530 57.9854:350 58.02266:2565 58.07291:495 58.99429:1797 59.03101:22256 61.01009:2163 61.02756:910 62.98936:1232 66.04585:346 67.01045:628 67.054:800 68.04899:869 68.99459:368 69.06898:453 70.02277:1342 70.02812:1030 70.06457:…	35495.2	167576	34159.2	20884.7	19739.4	12390	64915.6	18134.7	12515.3	49549.4	14868.1	11979	51449.3	16663	8561.37	41613	8143.97	9492.8	23540.8	16905.7	45566.1	33792	80736	55827.2	30236.5	35992	33017.2	30823.9	9735.06	11384.8	8546.77	218094	18259.5	105806	24145	241771	10149.3	32272.5	201397	21337	56573.6	14847.8	14281.5	66488.8	96259.5
556	21683 glycerol-1-phosphate byproduct by Kohei Takeuchi 02-2014	0.504	11.11	41.0382:741 42.9994:211 44.0072:582 44.01726:152 44.9788:549 45.01504:3224 45.03383:255 45.73887:71 45.76546:61 47.99295:106 52.00468:285 52.0302:104 52.98362:250 53.03681:197 54.04548:109 54.99966:303 55.01748:554 56.02522:126 56.06138:326 58.0226:1346 59.03066:2169 59.53456:54 60.03049:172 60.98263:236 61.00962:666 62.00896:98 62.94478:53 62.98769:315 63.97948:65 65.01485:224 66.04732:199 66.95…	527240	1055621	512285	561713	618646	560209	580674	673688	522601	805692	613880	685207	1275936	782442	593581	1321754	803380	947585	693275	709297	767585	674610	797030	664537	1057809	1042271	981234	829952	208038	751188	659050	697035	438850	960231	706814	832020	304038	396035	924309	647960	1017624	642046	404293	1087585	1451337
560	Glutamic acid_3TMS	0.77	122.14	41.0384:2091 42.99966:2451 44.00751:5464 45.01545:16816 46.01526:1768 55.01757:4000 56.04936:16489 58.02346:3492 59.03093:6120 60.0272:3402 61.01017:3348 66.02039:1766 68.04952:1834 72.03871:4207 76.02634:2386 77.02239:3675 84.02622:3756 84.04402:18638 86.04166:5730 88.03313:1729 89.04126:2279 95.01174:2088 98.04139:7716 99.0491:1607 100.05727:20728 101.00412:2872 101.06221:2902 101.99479:1858 10…	351912	1664086	412560	110852	441551	202852	1020596	101380	55045.8	465341	98163.4	380247	1091559	599444	263389	857524	500141	267376	665276	922496	1189080	858105	971076	793791	954558	905647	865405	800896	37445.3	139543	454389	1742773	220555	591335	239306	2488665	51074.1	351216	1361060	396579	1317462	524674	98418.8	1548340	1531096
561	Glutamic acid	0.881	5875.95	41.03853:8326 42.99966:3307 44.00753:2161 45.01539:27185 46.01603:3033 46.99492:7323 55.01754:6306 56.02605:2183 56.04937:32793 58.02324:3235 59.03106:25294 60.02667:3759 61.01045:3550 70.02296:4434 72.03877:15630 76.02612:6277 77.02271:2914 82.02791:4336 83.03596:3369 84.0258:3298 84.04397:138405 86.04163:7452 87.04869:3391 89.0414:2529 95.01274:2669 98.0417:8769 99.04891:5149 100.05721:101552 1…	351945	1664098	412614	110823	441451	202869	1019984	101366	55046.1	465234	98217.5	380249	1091538	598931	263422	857281	499864	267193	665581	922644	1188088	858090	970800	793818	954628	905221	865478	800876	37443.6	139511	454600	1740877	220643	591595	239250	2488468	51040.8	351233	1360770	396228	1317599	524857	98451.1	1547552	1531420
562	Unknown	0.193	12.6	40.9834:59 43.15947:9 43.98949:107 44.04933:68 44.08802:7 45.01522:2378 45.60698:13 46.016:43 46.99478:1192 47.04871:12 47.66208:15 47.96523:32 48.99027:81 50.01458:252 50.07099:6 51.02293:260 52.07942:18 52.98426:180 53.03358:35 53.14749:14 54.11232:9 54.99912:537 55.84241:9 56.02401:1304 56.04961:3388 56.32223:9 57.20786:14 57.69005:13 58.02252:550 59.03107:439 59.30541:16 60.01981:182 61.00972…	527573	1056642	513103	561967	618896	560524	581373	674366	523263	805936	614368	686033	1277353	783050	593791	1323513	804454	948019	693981	710221	768295	675515	798092	665644	1059282	1043148	982300	831511	208111	752162	659060	697884	439110	960811	708104	833726	304324	396004	926856	648864	1018865	642071	404526	1089780	1453650
564	Glutamic acid_3TMS	0.896	13.96	41.03833:1527 42.03292:392 42.04059:557 42.99954:1529 43.98925:840 44.00778:1395 44.97916:1234 45.0152:14670 46.01473:1085 46.99442:3250 54.03442:386 55.01763:2824 55.05331:413 56.02477:1330 56.04918:16757 58.02284:1790 58.99492:532 59.0308:6772 60.00204:1037 60.02726:1184 61.00968:2946 66.02013:505 68.02412:533 68.05002:489 70.02296:1097 72.03848:5467 76.0247:2008 76.02862:1907 77.02216:1261 82.…	352054	1664416	412463	110929	441616	202900	1022765	101547	55057.5	465528	98542.9	380316	1091897	601055	263327	857407	501066	267971	666099	922862	1191975	858344	972091	793852	954512	907129	865244	801324	37550.3	139942	455360	1743265	221141	592239	239346	2488750	51176.8	351310	1361120	396954	1321592	525179	98697.8	1547708	1531921
566	Unknown	0.681	19.69	41.03783:135 42.99946:365 44.05684:71 44.16232:4 44.37913:13 44.81779:5 44.97864:179 45.01538:329 46.99415:375 47.01228:125 47.04474:39 47.99955:108 50.2191:14 51.02302:172 51.71599:34 52.2023:10 52.79845:6 54.04603:167 55.05389:151 56.025:186 56.06158:198 56.27629:13 56.75843:8 57.12528:15 57.79738:6 58.07602:116 58.45052:19 58.99473:14 59.15765:11 59.35878:5 60.03527:37 62.98925:94 63.02418:113…	3745.93	3580.67	3583.74	2050.62	2887.96	2158.21	2810.88	2612.17	1391.12	4174.32	1975.4	952.807	2073.74	1105.01	1483.25	1606.35	1187.44	1187.48	1357.37	1693.98	1058.44	1221.19	3409.48	2843.53	1555.29	1084.36	1700.9	1389.51	700.596	1216.34	825.614	3144.59	2117.51	4974.4	4117.34	2872.04	1431.7	960.028	2557.88	4548.72	1243.07	1109.22	2151.9	1637.04	1069.61
567	4-Hydroxybenzoic acid	0.881	34.87	40.0299:103 41.03849:82 41.55691:6 42.9998:110 43.05461:22 43.58765:7 43.7883:16 43.98859:677 44.04565:153 44.64027:10 44.97878:159 45.18434:21 45.61908:6 45.97751:80 46.99488:300 47.32973:12 48.07533:21 49.00669:63 52.37338:10 53.28364:8 54.03286:42 54.04721:83 55.0181:194 55.05326:118 55.1235:8 58.02791:497 58.14743:11 60.00113:169 61.94749:66 63.95952:45 64.961:18 65.01069:57 65.03652:175 65.0…	6517.04	9809.69	7486.43	3984.56	8119.63	6104.73	6116.12	5123.39	4061.82	7393.87	5214.27	3500.47	5884.1	4390.01	2804.4	3868.29	4053.21	4123.57	5710.01	5803.7	3643.54	3793.71	7968.35	6989.3	4890.39	4192.43	4453.46	3993.24	3967.84	3679.06	4264.69	8997.69	6348.67	10211	8165.46	7838.96	4860.66	3974.61	6461.52	9866.16	4527.48	3558.11	4711.31	6238.6	4874.6
568	Unknown	0.63	19.32	41.03702:184 42.00919:279 42.04542:376 42.51697:12 42.99064:135 43.05464:68 44.05767:34 44.14498:21 44.9796:217 45.01509:848 45.17345:4 45.99588:221 46.29302:11 46.99489:370 47.97481:79 48.98148:28 50.30998:7 51.02357:17 52.03037:333 52.37148:4 55.01775:148 55.05349:200 56.14317:37 56.17238:33 56.76504:28 57.23962:4 57.4498:11 58.02282:200 58.0734:20 58.99432:122 59.03094:86 59.23518:4 61.00962:2…	817.235	5820.28	721.958	518.633	368.622	350.919	1987.33	418.728	277.125	1196.99	523.565	857.148	6645.17	1043.43	367.704	4382.2	550.631	685.966	1580.67	692.824	6458.52	4295.89	1487.4	1666.3	3893.17	2399.09	2511.81	3018.22	1754.05	19188.4	612.112	14076.5	582.618	1935.85	364.598	16352.9	4414.05	1882.87	8278.97	3045.22	42345.6	722.941	734.05	8825.2	10419.9
571	Phenylalanine	0.696	36.62	41.03858:200 42.99988:402 43.05386:296 43.98909:980 45.01561:4546 46.99443:712 47.01191:187 48.0754:195 51.00895:136 52.03085:701 53.03808:696 56.02594:83 57.18703:49 58.02323:331 58.0291:350 58.99632:425 59.03095:3834 59.05159:96 60.03312:361 61.9915:301 63.01005:130 64.03039:203 64.96091:63 65.03767:763 67.05386:1117 68.96358:72 68.99366:206 69.03262:341 69.0694:398 70.02258:593 71.08582:149 72…	9460.96	19198.9	8407.23	10236.5	4949.54	4663.01	16242	7626.33	5799.39	9617.5	5182.8	5779.73	12744.6	7052.18	4504.91	13621.9	5056.71	3837.84	6826.03	7036.81	12090.6	8956.63	17815	13180.2	12613.9	11492.7	11960	8624.79	4042.82	7400.55	5445.41	22568.1	6083.96	11884.6	6117.25	34649.6	5661.51	17818.7	31080.3	9197.28	16832	5900.21	5176.41	23499.8	18429.3
572	Unknown	0.904	17.97	40.03213:67 40.55173:4 44.97889:244 45.01532:1182 45.06721:87 45.98691:68 46.06956:21 47.99282:131 48.07332:65 51.02214:536 52.03056:155 52.12565:22 52.21343:6 52.98338:38 53.03786:184 53.21759:8 54.18442:4 55.01609:190 56.75079:7 59.03091:548 59.1632:10 59.97396:47 60.00224:121 60.02992:272 61.09557:30 62.01458:48 65.5267:6 66.01991:215 66.04517:325 66.08282:75 67.00991:184 67.94686:41 68.02641:…	5047.47	11745	4764.16	8030.38	2182.38	2926.5	7503.5	5514.09	3893.02	7285.03	6035.23	6725	10539.6	5362.91	2545.59	20757.4	5939.27	4029.21	5176.24	4355.17	11694.9	6408.41	12053.9	9714.1	12522.1	14728.2	13172.2	12011.2	1516.07	6937.99	4078.74	12674.6	4256.04	12437.3	4273.77	15516.2	3065.46	26196.8	19039.1	5136.22	19004.4	7508.28	3632.26	20619.2	21098.2
580	Unknown	0.956	92.22	40.02966:91 41.03781:352 42.04625:422 43.01814:887 43.05372:457 43.98894:317 44.00759:349 44.02553:98 44.97877:234 45.01551:828 45.03381:146 45.18799:27 46.97454:81 46.9942:964 51.0229:373 53.03355:145 54.03388:267 55.01728:193 55.3712:21 56.00616:87 56.0485:214 58.05329:169 59.03075:332 59.04726:115 59.08486:40 59.747:48 60.00393:183 61.00952:472 61.94479:54 63.0073:81 63.95325:42 64.96055:54 65…	20443.1	46355.6	19783	20283.4	22526	18489.3	22498.8	22723	18387	26865.5	24229.4	23900	46336.6	32679.4	21423.9	50617.8	30991.2	35110.8	28276	24836.3	31269.9	25714.3	29330.5	25605.7	42228.5	39290.9	39384.4	32465.4	9835.63	29534.8	26236.6	28341.8	16698.3	37191.4	25751.4	33792	12569	16824.3	39090.3	24275.8	43173.2	26098.2	15316.1	48248.9	59872
581	Unknown	0.659	16.16	40.24677:3 41.99389:54 42.04565:160 43.00002:5 43.13849:12 43.58897:6 43.84421:6 43.98875:105 44.13287:20 44.24547:10 44.4353:5 44.97909:427 45.13777:13 45.61754:8 45.97934:92 46.01478:61 46.9683:190 46.99429:1256 48.99013:144 50.01456:81 52.02988:305 53.1116:7 54.04577:128 55.16073:16 56.06118:164 57.21436:12 57.65036:2 58.02222:116 58.99455:477 59.03083:447 60.00077:227 61.04914:183 61.61557:10…	3919.15	9198.18	4474.11	4828.26	5274.09	4375.2	5083.64	5008.79	3913.14	6456.32	5397.39	4785.63	10373.6	7438.85	4791.03	11209.3	6437.17	7883.13	5741.85	4751.61	7150.4	4703.88	6792.85	5840.49	8272.75	8772.22	8073.35	6323.18	2142.15	5980.69	5657.06	6352.81	4000.82	8344.99	6083.69	7319.53	2892.15	3630.72	7598.52	5586.16	9342.74	5363.88	3574.53	10800	13043.4
583	Unknown	0.793	81.09	40.02533:138 42.04531:203 42.99994:260 43.98903:1965 44.00758:483 44.97902:876 45.01514:3042 45.03303:120 46.99466:592 47.99443:288 48.07426:93 48.99055:46 51.02206:149 52.03015:267 52.9833:70 53.0253:234 53.03818:349 54.00742:107 55.99569:128 58.02354:729 58.02976:539 58.99416:223 59.03047:2613 59.16307:35 60.00115:338 60.87217:36 61.98056:58 63.96167:221 65.03938:508 66.033:3839 66.09185:28 66.…	28653.5	30189.8	22374.2	471.411	49482.5	16641.6	8770.55	5694.02	941.561	25630.4	8395.62	344.171	396.332	466.512	202.093	352.537	357.848	520.744	533.853	461.372	95.0152	349.585	15956.4	13870.5	266.899	231.721	315.872	204.592	1225.18	139.455	688.779	30094.2	36739.3	49606.6	27326.7	9570.52	1940.22	296.334	7738.49	60020.6	401.518	181.341	25182.7	505.363	595.831
587	Unknown	0.185	44.8	42.04671:33 43.05364:235 43.98904:201 44.0494:18 44.80973:12 45.05613:106 45.11285:28 45.78471:11 45.97752:163 46.24495:22 46.99445:619 51.0106:143 51.02246:95 52.06251:18 53.03833:456 54.73757:11 55.21307:34 56.63599:18 57.18296:11 58.02837:285 58.07272:203 59.22376:31 59.96636:13 61.026:29 62.94615:10 63.02113:128 63.96272:94 64.96182:258 65.03843:12 66.02045:172 66.95666:101 67.0004:63 68.0246…	13171.9	22184.2	11242.6	21953.3	6055.66	7564.9	16776.1	15415.9	10296.6	17766.5	14032.7	17237.4	27059.9	13043.2	7236.78	54523.3	15757.4	11007.5	11950.8	11123.3	29523.1	16097.9	23818.4	19991.9	34974	42252.7	35357.3	30016.7	3290.11	18210.3	9323.67	25111.8	10222.3	24967.9	9882.84	20358.9	6767.54	73322.9	41707.4	12589.8	47111.8	18444	8236	45408.4	46870.8
597	Ribose	0.556	30.79	40.03046:131 41.03798:584 42.047:76 42.99985:324 43.01771:101 43.0537:1158 43.08868:72 43.98901:795 44.00773:423 44.97912:362 45.0154:3613 45.03246:64 45.11406:40 45.985:201 46.96901:104 48.00145:156 49.00573:190 51.02275:164 52.98388:184 53.03875:126 54.01162:81 54.99946:214 55.07453:81 55.97251:76 56.06097:328 57.09235:105 58.02882:349 58.99572:218 59.03061:2658 60.03389:430 61.00937:488 61.026…	2807.04	4922.31	1925.64	1923.71	2424.2	2744.49	5477.79	5241.41	2127.74	2591.58	3744.72	393484	451719	401910	279710	639044	488710	484170	336927	312621	395761	338122	42439.8	28974.3	619621	473844	412856	306113	206335	273796	360700	1683.97	2117.13	2752.77	3638.62	1181.48	2369.1	2253.97	1721.88	1741.73	404047	332781	217380	507647	665621
598	Ribose	0.622	39.57	41.03861:524 42.00925:253 42.99996:1786 43.05423:1524 44.00739:1345 44.04795:452 45.01533:4763 45.03466:566 46.00862:284 46.0154:908 46.99445:2019 48.01204:317 51.02351:435 52.03018:1733 53.03972:795 54.04705:626 55.01766:469 55.05406:1599 56.02618:493 56.06198:1034 58.02263:1592 59.03098:8205 59.04959:239 60.0021:513 66.04614:864 67.00985:241 67.04108:745 67.05435:1082 67.99403:401 68.99398:652 …	2748.77	5471.8	3322.57	2827.71	3200.05	2673.35	6634.59	5575.37	1891.15	8129.2	5314.44	392424	449400	399325	277953	635752	487029	481571	336716	311814	392681	336509	42121.5	30292.2	615895	469488	410688	304491	205224	272843	359231	2365.78	2085.91	5785.69	3764.45	1662.31	2801.01	2683.19	2805.35	1561.8	402366	331774	216373	505192	663214
599	Ribose	0.659	630.26	41.03833:929 42.03432:815 42.99963:1640 43.05399:971 43.06617:1011 43.98896:605 44.00768:2292 45.01529:17289 46.01544:676 46.99469:1277 54.04597:1373 55.01753:1552 56.06187:679 58.0233:1868 58.99543:997 59.03104:16240 60.03054:1061 61.01064:1851 66.02028:710 67.04116:1368 68.02484:636 69.06931:1754 70.02785:1426 71.08548:1878 72.03855:6996 72.08879:547 73.30024:857 73.31047:678 73.3548:754 73.437…	2677.74	1977.54	3098.26	2690.32	3023.64	2734.36	6435.78	3552.51	1906.3	2812.55	4730.26	392940	450987	399009	279207	639584	487131	481739	336472	312231	392619	337598	42233.1	30437.4	618244	470685	412197	305700	205788	273417	360230	2246.97	2024.34	649.353	1730.76	1748.33	2729.89	2769.77	2814.76	1345.59	403275	332137	217099	507018	664305
600	Ribose	0.874	10.55	42.03305:325 42.99912:244 43.05403:768 43.98898:733 45.0154:2674 46.99408:355 48.07431:120 50.01488:374 53.03796:299 54.03392:231 54.04595:132 55.01866:168 56.00771:38 57.29899:37 58.02202:242 59.03059:1727 59.9926:121 60.0307:275 61.00964:331 63.00565:51 64.01254:66 64.95988:80 65.03892:116 67.05334:144 67.99468:65 68.99401:545 69.01729:90 69.06937:188 70.02959:327 71.17014:41 72.00053:92 72.038…	11743.1	5823.58	14706.4	4444.7	3749.34	2466.37	6714.65	4579.45	1305.86	4992.47	2643.56	4887.72	22452.7	4648.87	3693.36	18635	1556.51	2588.58	6051.64	6088.37	9312.1	19185.6	7786.91	5166.66	9148.7	11080.6	9512.21	15904.1	734.672	6053.97	5203.49	4449.25	4249.8	12395.2	8737.66	6899.43	373.304	3996.69	8180.49	8468.37	15828.7	2614.3	2099.88	19677.5	14028.3
601	Ribose	0.511	36.81	41.03824:871 42.0087:139 42.97291:105 42.99964:583 43.98891:2234 44.0073:632 44.97903:599 45.0154:6173 45.0316:138 46.01551:441 46.99459:1022 47.01268:181 48.99121:160 49.00666:209 50.01468:253 53.00144:253 53.0391:307 54.00857:203 54.04633:417 55.01743:680 55.0544:1360 55.9715:215 55.99505:330 56.0617:270 57.09182:160 58.02247:1042 58.02845:434 58.99438:561 59.03095:6179 60.03175:365 61.01005:83…	11733.1	5826.32	14794.6	4446.44	3749.44	2492.16	6780.76	4637.84	1314.07	5010.32	2652.59	4894.64	22437.2	4676.64	3726.89	18638.9	1560.25	2597.53	6034.73	6084.77	9408.29	19178.4	7875.76	5173.61	9177.86	11200.2	9529.49	15893.2	748.453	6050.47	5205.91	4450.15	4241.22	12355.5	8729.18	6899.28	373.557	4012.75	8177.85	8470.61	15835.3	2615.32	2100.82	19646.2	14024.4
602	Ribose	0.8	175.31	41.03842:710 42.99984:241 44.00849:449 45.01547:6668 45.0337:387 45.06101:111 46.97374:104 46.99472:864 52.03035:130 52.98399:176 53.03828:287 54.04621:305 55.01705:354 56.02597:140 56.06211:574 57.52533:78 58.02867:822 58.99418:208 59.0312:4331 61.0102:562 62.01115:199 63.02266:134 63.96283:255 66.04708:162 68.02412:127 68.04872:244 68.99387:255 69.99703:84 70.02243:512 71.08556:503 72.02643:84 …	11733.1	5826.21	14794.6	4446.44	3749.44	2492.17	6780.75	4637.84	1314.05	5010.32	2652.59	4894.53	22437.2	4676.64	3726.89	18638.9	1560.25	2597.53	6034.59	6084.64	9408.28	19178.2	7875.75	5173.62	9177.89	11200.2	9529.52	15893	748.453	6050.47	5205.91	4450.15	4241.22	12356.4	8729.18	6899.28	373.557	4012.75	8178.92	8470.61	15835.3	2615.32	2100.82	19646.2	14024.4
603	Ribose	0.459	25.17	41.99246:139 42.04639:107 43.00029:482 43.98916:1211 44.00752:544 45.11656:32 49.98908:185 50.01539:284 51.02283:287 52.03113:314 52.98464:174 54.04608:78 57.55265:73 57.98753:90 58.07198:146 58.9943:62 59.31818:34 60.00209:139 60.02993:304 60.07662:79 61.02979:240 61.98275:76 62.94512:98 63.0067:139 64.96204:134 65.03664:93 66.52078:83 67.01784:230 68.05007:249 68.99437:95 69.03389:97 70.07764:3…	126.748	71.8269	91.2472	223.263	182.425	118.446	103.645	181.848	162.525	199.496	161.295	2824.76	4837.79	3270.7	2633.26	4135.4	3390.91	3617.17	3670.52	5056	3028.69	2822.64	602.603	284.145	4659.45	4241.12	4814.38	4025.9	2533.37	2709.24	2227.57	131.512	121.423	193.186	171.231	340.353	144.915	186.867	188.43	167.103	5638.93	2685.26	1560	5403	3679.61
613	Unknown	0.8	17.46	41.03828:354 41.99122:135 42.2427:18 42.99915:974 43.05357:1838 43.27312:15 43.5244:37 43.68822:18 43.98896:1443 44.00725:1662 44.24955:8 44.60339:10 44.82252:23 45.17864:30 45.44758:17 45.79114:18 46.61226:6 46.77017:5 49.80041:6 51.5134:91 51.76873:8 52.03059:533 52.98385:152 53.02376:476 53.46351:11 55.01746:1222 55.05361:2424 55.11218:11 55.45903:7 55.59769:40 56.0251:398 56.0487:633 56.06157…	2346.24	3142.94	2101.48	2792.16	2083.91	2269.74	2713.07	2612.24	2523.8	2702.56	2249.84	2962.26	2732.1	2367.54	2350.46	2911.91	2764.69	2617.38	2641.88	2543.44	2834.07	2204.81	2852.4	2322.19	3190.06	2693.1	3211.86	2742.12	2688.23	3276.53	2975.05	3047.33	2972.14	2706.61	2313.71	3945.85	3346.93	2351.22	2705.62	3765.58	3319.11	3241.08	3063.87	3571.13	3242.02
615	Unknown	0.667	30.6	41.03852:1215 42.04567:258 42.99935:346 43.05394:4516 43.06837:44 43.11927:93 43.71349:19 43.98869:280 44.05778:278 44.97832:324 45.0152:2332 45.09073:33 46.01466:265 46.9947:895 48.99166:32 50.01444:320 50.98104:165 52.00376:354 52.02997:223 53.99115:104 55.01701:98 55.05414:1729 55.99437:49 56.06138:1327 56.1152:30 57.18665:79 57.28407:60 57.31481:27 57.35149:27 57.51435:19 57.80339:50 58.00959…	16918.2	17044	15306.9	16055.1	16617.1	15672.3	15872.7	16890.7	16397.9	17292.3	17952.2	15206.8	17705	15672.7	16587	16722.3	17802	16557.2	17699.3	16206	16836.8	17215.9	16433.6	19227.2	17204.9	18016.6	15835.9	17058.6	16983.6	16815	16537.5	16950.2	16149.4	18717.7	16914.9	16515.5	16625.3	17806.8	17467.2	17084.1	17972.4	16830.9	17031.2	16167.8	17242.7
623	Unknown	0.393	21.44	41.03797:212 42.04678:124 43.01751:4498 43.05356:227 43.23479:25 43.33302:26 43.98929:566 44.00812:1075 44.04894:225 45.01522:1057 45.10521:32 46.01363:66 46.99429:1236 47.01221:64 50.01461:285 51.02267:506 52.98336:154 54.99904:726 55.05426:390 55.99426:90 56.04608:259 56.06153:302 56.13084:26 58.02267:234 58.02783:316 59.03079:2878 60.0303:308 60.07452:198 61.01043:1200 63.98721:52 64.96046:68 …	25791.7	99347.9	21182.9	622.024	49521.9	11242.2	21838.2	4029.8	770.763	39035.1	6277.97	703.073	729.646	645.066	146.719	856.875	472.541	479.973	940.546	853.982	896.052	800.821	30380.7	20816.5	667.289	408.241	352.491	370.397	529.939	252.836	519.087	86368.7	20678.6	63360.6	15985	47836.3	1099.75	105.851	22885.4	42276.3	887.631	335.972	14206.1	1877.65	1277.47
626	Unknown	0.681	16.55	40.74136:6 42.03252:64 42.99964:334 43.05389:357 44.70177:7 45.01514:133 45.04109:50 45.27803:22 46.3496:3 46.99426:394 47.96596:33 47.99421:197 50.8254:4 51.02287:342 51.20526:19 51.49346:13 52.16027:4 53.03797:153 54.04776:137 55.0533:134 56.02534:4 56.0621:85 56.26053:17 57.164:6 58.0222:396 58.06276:10 58.19288:11 60.01982:91 60.03112:112 60.037:147 61.9447:58 62.02723:86 62.07862:12 62.94228…	2972.31	3062.17	1779.5	3554.69	2325.18	2247.72	2600.89	3381.99	4063.43	4494.41	4156.4	799.506	1466.8	735.967	480.594	1470.74	812.905	615.793	827.104	648.713	717.189	700.062	4949.63	3487.28	1212.4	1084.67	949.865	740.914	3727.03	1174.47	628.347	2826.61	2641.29	4285.85	3883.38	5614	4095.61	4691.63	3912.3	4917.68	1020.04	982.626	4147.68	1041.13	1544.15
627	Ribitol	0.637	44.06	41.03848:443 43.05421:236 43.98925:1691 44.00741:1314 44.01637:137 44.97935:514 45.01548:2494 46.99456:890 48.00065:106 48.07447:81 49.0067:215 50.01487:338 53.01249:147 53.0374:359 54.00855:260 54.0462:211 55.05428:836 56.06191:403 58.02316:257 58.99351:412 59.03086:1631 59.04812:161 60.00243:216 60.0312:460 61.01048:1017 61.99791:362 66.02071:517 66.04612:262 67.04047:444 68.03683:178 68.06162:…	4845.33	5410.69	4343.99	3725.21	6407.7	5049.01	4480.19	4866.41	4481.98	6155.87	4584.35	30336.2	55161.6	39322.9	23275.6	43610.1	35490.2	31359.5	40639.3	55098	35724	36951.9	5655.44	6227.31	50536.6	48224.7	47260	41122.8	5741.57	31691.6	29930.1	4790.65	4261.89	7083.74	5080.47	7042.53	3989.96	5622.41	5815.19	6578	39539.9	31141.3	5189.72	58001.3	54534
629	Glycerol-2-phosphate+glycerol 3-phosphate	0.526	14.53	41.0381:419 41.05666:382 41.99152:354 43.07853:84 44.00791:240 44.0494:174 44.97884:234 45.01532:972 45.02917:126 45.99682:221 47.9747:148 48.00152:122 48.98978:182 51.02264:111 52.03014:354 52.98362:148 53.03738:148 54.02248:300 54.04571:555 55.01749:764 55.05449:396 55.99438:105 56.049:1123 59.03875:43 60.0025:510 60.0335:452 60.07014:122 60.10846:37 61.00999:979 62.00999:156 64.00599:193 64.51…	26792.8	42985.3	24110.9	22242.4	27322.1	28138.6	25257.9	35055	22690.8	35940.6	29817	22937	52827.4	23335.3	19533.2	44625.8	37642.2	41726.1	26530.6	28026.7	32655.9	25923.5	40343.5	37750.4	48027.7	43995.6	39793.1	32407.5	18427.6	31218.5	29500.6	33121.4	26399.6	53584.2	39422.4	37920	17577.1	36683.8	32686.9	43921.7	44445	25914.2	24406.9	40883.6	48942.9
630	Glycerol-2-phosphate+glycerol 3-phosphate	0.881	150.17	40.03052:111 42.99995:458 43.01661:176 43.05411:922 43.98905:1237 45.01538:3384 45.03424:111 45.98734:94 46.01488:526 46.96786:159 46.99451:840 48.99111:201 50.01498:100 51.02264:288 52.98271:96 53.03824:73 53.9919:104 54.03294:80 54.04637:160 55.01745:409 55.05373:221 56.02551:366 56.06207:999 57.98121:91 58.99518:202 59.03083:3103 60.00184:90 60.03057:382 61.01061:356 62.9444:180 63.02325:160 6…	26901.2	43016.3	24151.3	22273.1	27493.1	28097.3	25292.8	35037.9	22803.4	36051.4	29868.8	22937.1	52909.7	23341.1	19565.1	44786.9	37724.9	41806	26561.6	28072.8	32729.8	25953.5	40400.5	37780.6	48110.4	44056.6	39899.3	32414.2	18424.9	31212	29511.5	33105.1	26403.2	53591.6	39487.9	37941	17597.5	36831.4	32596.2	43902.9	44441.1	25861	24349.4	40895.4	48994.4
632	glutamine	0.007	7.89	41.03799:221 42.99933:357 43.0538:1201 43.98907:245 45.01539:429 46.99418:302 51.02259:479 55.05358:350 55.9818:180 56.06161:606 58.07381:219 59.03052:528 61.01032:253 65.03809:323 67.0528:190 69.06947:872 70.02689:329 70.07669:568 71.08515:3883 72.08878:205 78.03373:393 82.02586:405 83.08515:505 84.092:469 85.1005:2648 86.99659:173 94.07811:195 97.08539:175 98.1078:215 99.11608:660 103.0567:431 …	83399.6	260198	97355	63099.2	16613.2	17593.2	131395	62972.5	35495.5	101463	47864	47229.9	232442	65444.1	14896.8	187574	26024.5	19377.9	100037	73441.7	214324	138051	154862	133495	164848	160451	147807	124393	3368.18	35096.1	22909.2	249934	49336	223233	45488.8	297172	9690.71	206047	256035	44606.8	268628	51978.2	45486.5	257433	328636
633	Unknown	0.911	38.39	41.99211:66 42.05851:237 43.01743:75 43.05376:841 43.09855:29 43.13974:10 43.20889:9 43.29313:5 43.67029:14 44.00775:98 44.04903:88 44.21308:7 44.4962:25 45.01477:582 45.20185:21 45.32671:11 45.98646:16 48.07342:53 49.0057:65 51.02273:73 51.49451:27 52.11236:15 52.20523:8 52.38424:8 54.03333:218 54.43514:12 55.01901:169 55.26898:5 55.30568:4 56.06129:246 57.12442:57 57.17867:30 57.96548:24 58.073…	1006.28	687.062	985.129	980.871	1389.87	906.858	866.424	872.561	958.504	629.554	988.477	18084.4	24849	17952.6	14767.6	22804.6	20909.1	20558.2	16053.6	24732.3	22091.3	13401.8	2199.16	2264.81	24690.9	27648.9	25018.7	20090.9	11537.4	14237.4	13400.9	728.634	662.323	1081.32	696.413	830.693	1083.72	1241.01	504.576	614.015	30489.9	14265.8	9007.07	30949.9	23109.2
637	Aconitic acid delta	0.681	29.34	42.01005:236 42.99979:247 43.98915:1015 44.00725:223 44.33973:19 44.97908:875 45.03394:95 45.2048:26 45.24045:20 45.78452:16 46.01769:41 46.99494:304 47.16436:18 47.99487:41 48.99114:236 51.02271:357 51.04836:172 52.03048:913 52.98318:42 53.03883:45 53.12186:11 53.75092:16 54.02109:416 54.04528:592 54.39334:15 54.9872:136 55.06238:55 55.10116:17 55.13699:24 55.25904:50 56.06159:905 57.0915:36 57.…	4697.25	15203.7	5619.02	2455.69	11416.9	4430.26	6753.92	3820.18	1857.05	8079.56	4825.83	911.817	3252.95	1381.36	583.774	1755.95	1035.95	1513.26	1181.71	1714.6	1649.04	1439.05	8103.9	6390.27	1762.31	1707.6	1572.68	1328.99	1071.97	826.19	1647.15	14833.7	4377.9	11585.8	5735.44	12016	2098.46	783.258	6100.25	12438.3	3432.49	2513.62	6439.92	2315.21	2224.69
639	Putrescine	0.378	379.24	45.0154:12812 45.03429:5705 55.054:3212 56.06192:2891 58.07273:1793 59.03109:38389 61.02818:2465 70.07718:5789 83.08533:1838 86.04168:89661 88.03829:3115 91.01514:2494 97.04598:2543 99.06181:17617 100.00288:2076 100.0574:7161 101.0586:3099 102.01729:1869 102.0728:5307 103.05691:1861 110.04197:3315 113.02315:3315 114.01797:1945 114.07298:12648 115.03838:3207 115.07789:2364 116.03411:6837 116.08831…	671467	1861076	785640	533307	111587	129557	1007826	528328	275898	830215	385394	350501	1762717	534630	109128	1414000	192168	139313	764706	570979	1549369	1037689	1245215	1045708	1297447	1255260	1139951	961249	29534	404328	189256	2084381	487282	1740300	388111	2047011	87089.9	1512066	1831410	433324	2389162	449426	450362	1826116	2351927
640	Putrescine	0.556	170.95	41.03833:2784 45.0151:915 55.05383:825 56.06138:1424 58.0231:1358 59.03071:2011 68.06155:1148 69.06895:1334 83.08476:855 86.04129:1042 86.10316:1833 97.09974:1122 99.0614:8835 100.02048:1188 100.05678:3455 101.05753:2572 103.05549:1277 110.04089:1764 112.05676:2841 113.0223:1622 117.05344:4192 127.07381:1086 130.05969:937 131.06879:6476 133.04817:904 143.1046:1382 144.06462:2600 159.08145:886 161…	671476	1861000	785380	533339	111569	129523	1009006	528425	275888	830194	385884	350481	1762850	535397	109092	1414036	192322	139404	764672	570952	1551525	1037686	1245869	1045584	1297242	1256382	1139729	961273	29551.1	404308	189220	2084182	487229	1740185	388095	2046890	87084	1511945	1831319	433241	2389049	449437	450338	1826002	2351794
641	Putrescine	0.859	3398.87	42.9994:2317 45.01535:24688 56.06198:4110 58.02327:2965 59.03088:97428 60.03045:3491 61.02837:3431 72.0386:4644 86.04131:130157 87.04252:6927 87.0617:2461 88.03844:5019 97.04653:2923 98.04191:3227 99.00739:2288 99.06159:18738 100.003:8984 100.05708:44953 101.02238:4140 101.05782:6289 102.07246:2674 110.04114:3486 112.05709:8361 113.02252:4141 113.04174:2262 114.018:2917 114.0727:14811 115.03869:6…	671454	1860998	785480	533313	111570	129527	1008284	528348	275882	830154	385596	350482	1762668	534970	109106	1414007	192232	139378	764675	570957	1550354	1037665	1245430	1045538	1297198	1255733	1139751	961187	29551.1	404308	189245	2084182	487222	1740185	388078	2046916	87087.7	1511945	1831319	433241	2389049	449400	450293	1826002	2351794
643	Gentisic acid	0.63	21.61	41.24114:9 41.99168:186 43.05421:1072 43.10722:7 43.98872:326 44.00731:221 44.05732:172 44.36927:11 44.65246:20 44.68013:8 44.97861:295 45.01528:936 45.03292:109 45.61537:7 45.64454:7 45.70826:6 45.94304:8 45.98027:69 46.97605:40 47.11497:16 50.01494:47 50.0469:15 50.59192:10 51.02274:495 52.0302:641 52.14127:9 53.03851:211 53.4027:8 55.44233:7 55.98079:59 56.62486:12 57.08911:60 57.27282:43 57.3…	965.979	1308.78	699.981	1226.2	604.912	653.324	629.362	739.329	750.931	791.668	770.618	1467.11	2398.85	1925.14	1749.51	3699.47	1738.77	2138.09	1684.12	2154.45	1256.53	1388.05	1112.83	1030.62	2489.69	2186.84	2626.1	1810.7	625.782	2286.72	1705.39	932.108	632.9	1460.53	1156.73	991.601	908.246	924.486	1002.58	734.67	1794.6	1933.26	676.636	2198.23	2170.24
649	Unknown	0.393	17.61	42.2544:5 43.71823:5 43.98885:165 44.02554:272 45.13454:38 45.98401:22 46.07084:3 50.01498:211 50.11858:2 50.30621:4 51.02198:99 52.03021:192 52.48148:5 54.03202:185 55.16519:7 55.2275:9 56.01357:3 56.06137:56 57.5789:4 58.0734:137 58.37538:10 61.11837:5 61.63074:10 62.01756:57 64.96045:45 66.04469:26 66.95352:51 67.05365:110 67.99474:9 68.02434:12 68.06072:53 68.1517:7 69.02216:27 69.18298:2 69.…	279.394	648.757	378.995	289.049	549.507	311.359	376.675	283.973	257.478	467.812	294.495	2738.51	6772.43	3294.25	2373.01	7277.63	4165.77	2827.72	4129.15	4210.28	5782.91	4961.86	499.856	380.617	6472.33	6045.16	5844.86	4169.46	291.38	3779.98	3265.49	691.866	328.838	626.822	481.083	645.878	283.689	556.92	566.072	423.058	6723.45	4271.15	336.567	9951.35	10517.2
653	rac-Glycerol 3-phosphoate; GC-EI-TOF; MS; 4 TMS; BP	0.793	20.34	41.03804:467 41.09397:42 41.99264:128 42.0415:219 42.99944:2732 44.05839:159 44.97877:8783 45.01534:16110 45.12083:174 45.27611:132 45.29509:120 45.719:51 46.01476:524 46.96824:142 46.99438:970 48.60101:40 50.65382:55 51.49749:62 52.98521:163 55.017:1112 55.054:1414 56.00842:174 57.18896:65 57.56202:70 57.80646:41 58.01393:298 58.02292:1013 58.07166:181 58.0991:47 58.99493:1126 59.03088:21118 59.…	3010.46	3713.05	1854.16	3268.77	2775.04	2554.52	2804.95	2969.22	2923.68	4378.26	3661.73	3095.69	3969.57	3475.38	1942.97	4618.18	3316.69	3281.24	3545.58	3962.86	3546.76	2522.92	3640.1	3382.39	4579.31	3519.18	3430.83	3779.03	2290.34	3558.08	2428.61	4319.29	2722.58	4565.32	3373.77	3096.17	2146.1	3740.12	3808.72	4479.73	4794.52	2506.14	2569.51	3576.07	5440.64
654	rac-Glycerol 3-phosphoate; GC-EI-TOF; MS; 4 TMS; BP	0.911	2368.67	43.98906:1601 44.00729:770 44.0574:319 44.97889:1607 45.01508:9290 45.03424:270 46.01569:695 46.99485:1234 48.99096:167 49.00757:227 51.02303:546 53.03812:400 54.04639:456 55.01719:567 55.05411:1034 56.04837:338 58.02342:1606 59.03085:4897 59.05339:169 60.00271:345 61.02694:233 65.03854:312 66.02159:392 68.01388:250 68.0619:371 68.99412:807 69.0153:282 69.06982:1232 70.02267:764 71.0852:5632 72.0…	770787	1070297	645034	1001687	791519	716539	780565	856428	760534	1037510	891512	795757	1208547	837341	631874	1175004	959764	825894	892462	839384	1001775	934485	1120076	971954	1205646	1129810	1074447	955538	513144	857617	758114	1185977	721316	1246233	1075297	926791	572059	1089989	1023740	1093010	1061656	839102	769182	1059415	1279616
655	rac-Glycerol 3-phosphoate; GC-EI-TOF; MS; 4 TMS; BP	0.452	182.57	41.99123:72 42.99943:566 44.97868:561 45.0154:5153 45.02769:144 46.0153:374 46.99458:620 48.9931:63 50.01482:486 52.03104:161 54.99903:134 55.0539:477 56.02492:359 57.98534:88 58.02292:225 58.03011:451 58.07604:217 59.0308:3374 59.07787:102 60.03109:621 61.01011:1584 61.02003:368 66.02025:265 66.95676:69 69.06951:892 69.07732:69 70.02297:462 70.07767:307 72.03841:1093 73.28773:147 73.34226:100 73…	772195	1074450	646887	1003513	792410	718923	782484	859009	761619	1039641	892716	796222	1210919	838031	633930	1178193	960955	826797	893334	840142	1004383	937129	1123039	974979	1210124	1132302	1077490	957290	513405	858093	758437	1188720	720749	1247886	1074987	927772	572448	1090144	1024175	1094684	1063994	839998	769505	1062045	1282121
656	3-phosphoglycerate	0.674	11.67	41.03871:33 41.99151:156 43.00016:639 43.05389:1618 43.98935:433 44.0077:502 44.05724:96 44.97883:699 45.01523:4387 45.33021:27 45.36009:23 46.01406:203 46.96619:43 46.9947:713 47.99416:224 48.26716:30 52.03073:477 53.03848:325 55.01832:352 55.05418:1062 55.2519:19 55.69906:21 56.06129:692 57.08428:100 57.21196:27 57.2417:32 57.33584:25 57.74798:28 58.02923:606 58.04125:444 58.06419:390 58.11761:…	8969.51	12094.6	8498.31	4693.63	7200.21	5809.69	9980.21	6498.07	4486.83	11574.3	6985.21	10075.9	19699.8	10048.3	7287.48	15883.7	10956	11006.9	12420	10601.2	13785.5	15285	8670.02	8881.14	12712.8	13488.8	12836.7	11806.1	2681.32	11464.4	10395.6	8227.44	5333.87	10340.2	10988.8	10031.8	3927.26	8870.97	8306.54	12159.5	18025.3	12600.2	6040.49	14345.5	18334.4
657	rac-Glycerol 3-phosphoate; GC-EI-TOF; MS; 4 TMS; BP	0.319	12.79	40.03135:91 43.0917:36 43.98921:490 44.0076:759 44.04853:150 44.9792:205 45.01547:6648 45.26919:49 45.3534:24 45.69106:44 45.75938:29 45.97797:159 46.01421:799 46.99438:991 51.02314:189 52.01812:385 52.03107:120 54.03448:217 54.04583:543 56.02534:367 57.21319:36 58.02349:1040 58.02746:508 58.04229:153 58.07502:71 59.03095:5353 59.05025:259 59.10008:93 60.05101:167 60.12053:25 61.01064:1425 61.997…	772191	1073705	646097	1002886	792430	717596	782601	857616	761746	1039148	893063	796687	1211085	838105	632358	1177559	960562	826601	894025	840838	1003986	936524	1122536	974363	1208200	1131607	1077409	957383	513212	859160	759000	1189270	721038	1248311	1077838	928316	573161	1092639	1025460	1095847	1064367	840864	769495	1062833	1284814
659	Glutamine	0.474	8.78	40.16012:20 41.03832:128 42.103:21 42.99945:40 43.0542:1614 43.10379:19 43.24838:20 43.98912:455 44.05676:21 44.06318:26 45.01548:3710 45.04752:134 46.99478:403 47.12052:24 47.27753:19 47.41161:27 47.99503:97 49.04162:45 51.02243:450 52.018:274 52.0304:63 53.03829:219 54.00967:131 54.04256:136 54.15898:25 54.99955:136 55.05457:1176 56.02581:526 56.06198:390 56.33739:18 57.09076:60 57.1173:33 58.0…	2697.84	5742.51	2027.25	1079.71	1418.81	655.662	4964	1051.08	778.025	2133.9	771.27	1068.43	3523.85	1264.45	935.282	7216.07	750.058	943.533	1397.8	1077	5201.51	2996.52	3763.56	2208.37	2887.66	2519.77	2748.34	3325.35	649.786	1332.75	914.576	8006.39	708.781	2225.53	1003.91	29514.6	779.815	1872.62	11394.1	1222.41	6263.11	896.064	716.177	12594.7	8054.04
664	Unknown	0.733	30.78	41.01176:127 41.03847:505 42.00929:97 42.03354:1025 43.05381:1303 43.98886:661 44.00728:168 45.01531:1367 45.14319:20 45.37671:16 47.99364:128 48.07336:44 50.0144:201 50.99583:74 52.06658:25 53.00338:176 53.15462:24 54.0094:167 55.04158:196 55.05394:799 55.17693:26 56.02373:36 56.06238:480 57.13678:28 57.18108:23 57.25521:14 58.02867:716 59.01205:125 59.03033:910 59.1218:14 60.0286:343 61.00983:4…	17173.1	19266.8	17862.1	1056.27	17556.7	10797.6	10440.1	6769.54	1025.39	14455.6	8744.83	393.116	827.929	539.263	307.662	638.008	246.206	446.292	681.812	576.609	583.9	405.491	13098.7	9820.92	598.854	699.853	590.164	430.385	1520.72	605.605	556.188	17400.2	11477.4	31258.5	23089.6	11195.6	1757.65	637.671	10346.3	15975.3	552.398	709.759	5194.81	662.004	830.446
665	Unknown	0.481	11.95	41.03785:276 41.09539:9 41.23864:14 41.99167:44 42.0334:369 43.05379:1077 43.11811:27 43.61759:18 44.05767:83 44.97838:160 45.01477:349 46.01435:351 46.20009:10 46.99451:91 47.42588:9 47.99429:139 48.03873:16 52.50432:42 55.0173:172 55.05398:1100 55.10082:18 56.06168:72 57.0911:78 57.31147:15 57.53774:9 57.72255:13 58.0054:107 58.07389:196 58.16363:8 59.03059:216 59.04493:60 59.12982:22 59.15871:…	7968.03	9305.33	6636.51	2818.3	3750.49	2642.2	8471.32	3120.42	1965.04	8811.55	2682.85	1786.52	4425.79	3591.78	1684.81	3959.68	956.972	1633.19	3497.71	4478.77	4298.34	5553.79	9131.26	5753.09	2074.65	2440.44	2643.78	3157.95	1641.14	1315.45	1648.4	11493.1	3396.31	13401.2	5387.91	11719.7	1733.93	3105.62	12887.8	6734.7	3134.91	2397.16	4619.65	3260.45	3713.6
670	Unknown	0.526	20.52	42.1711:3 42.99907:278 43.05432:18 43.27266:3 44.05775:26 44.13566:19 44.18972:21 44.55533:6 44.74206:10 45.16099:12 47.99481:43 48.42494:2 50.01442:238 51.02286:218 51.41343:5 52.03019:72 52.04361:17 53.1937:10 54.01978:99 54.04574:85 55.05358:436 55.98:43 58.0718:118 59.23867:12 59.442:4 60.01127:103 60.03152:116 60.4678:3 61.83474:6 64.62578:11 64.96023:188 65.94037:77 66.04546:316 67.17169:12…	630.685	453.832	362.408	462.469	588.549	399.035	614.352	549.425	368.927	814.435	456.122	1504.04	2030.21	1436.26	1411.9	2410.26	1668.83	1398.04	1349.51	2243.95	1913.57	1544.49	615.235	430.195	1865.25	2034.63	1866.8	1489.02	529.191	1566.75	1372.44	622.839	650.985	748.219	817.007	627.863	443.76	681.658	590.978	609.4	2402.02	1194.15	714.86	2681.59	2300.67
672	Unknown	0.904	10.44	41.00191:54 41.03918:81 42.02085:182 42.04762:47 42.40123:4 42.9988:122 43.05348:127 43.14304:27 43.99429:15 44.1323:4 45.01499:328 46.01534:66 46.969:155 47.01438:39 47.82304:5 49.00666:41 49.07872:5 50.01442:71 51.32713:9 52.03019:430 52.35946:5 53.025:21 53.03804:33 53.75924:4 54.03487:116 55.01778:103 55.05364:180 56.01266:92 56.06011:472 58.02228:164 58.07176:133 58.18244:5 59.29248:6 60.001…	5366.82	10468.1	5227.1	5237.69	5143.6	4006.39	5677.96	4314.13	5155.85	6863.8	4037.54	5012.76	10672.9	6424.97	4768.33	11154.7	5275.83	5107.27	7540.76	5022.92	6824.1	6224.31	6344.26	5056.7	8095.55	7299.9	7048.78	6166.14	2668.33	7561.13	5197.48	10616.2	5158.64	11639.1	5116.9	6381.33	3859.55	7775.43	6646.13	5872.5	11069.7	5522.07	5916.6	9542.42	13127.2
674	Unknown	0.081	14.33	41.99193:146 42.03344:18 43.00054:58 43.01736:225 44.00754:79 44.15535:25 45.32165:17 45.38331:28 45.73962:8 45.97857:147 46.11748:6 47.96507:67 48.01208:118 49.0063:81 50.01438:69 50.12083:16 51.21341:7 51.24086:9 52.98418:66 54.04614:87 55.01752:93 55.24772:4 55.34921:7 55.99521:56 56.02131:294 57.09011:21 57.2248:17 57.72054:18 58.02844:416 58.5046:12 58.99456:27 59.03108:176 59.58282:4 60.002…	404.088	674.209	398.93	611.294	530.35	260.515	447.963	325.798	374.773	803.394	355.146	1550.47	2894.96	2186.38	826.257	15010.6	1612.97	1419.03	1354.66	1556.18	2177.61	2057.3	559.457	455.799	2166.68	2079.81	2169.48	2244.46	180.623	1024.26	1044.3	722.835	267.351	527.241	408.317	706.71	211.28	564.221	648.43	593.335	2802.57	1083.75	324.986	3356.07	3772.17
675	Unknown	0.326	14.36	40.02972:61 41.03893:29 42.99965:37 43.18941:16 43.2919:3 43.9889:279 44.13568:3 44.69784:7 44.91058:9 44.97877:239 45.15727:5 45.25655:15 46.0141:230 46.99476:543 47.73665:4 47.9758:4 51.02327:350 53.03763:472 53.19162:7 54.04575:86 55.05352:261 55.86161:4 56.01381:102 57.66814:4 58.02862:142 58.07241:324 58.99674:120 60.00434:155 61.02756:461 61.10126:10 62.01868:128 62.51935:45 63.95944:71 64.…	3760.62	4380.48	2702.06	3135.35	1528.67	1551.25	3697.96	3007	2459.25	4058.6	2519.14	5578.17	12235.9	5739.46	2604.99	9616.4	5888.34	3723.27	5669.99	5801.9	8145.86	5965.16	3644.06	2967.1	9780.44	7240.26	7555.93	6195.83	871.559	4362.32	3412.58	4318.18	2657.04	4981.48	2556.34	5581.22	1409.45	5113.73	4783.68	3559.76	12675.5	5377.83	3123.54	12207.4	15084.1
676	Thymidine 5'-diphosphate	0.837	34.2	41.03831:460 42.0101:153 42.99936:386 43.05455:396 43.99938:668 44.00639:446 44.97898:267 45.01535:2577 45.99578:352 46.99455:1168 49.0077:117 51.04858:69 52.00484:109 52.03068:1049 53.0015:120 53.03844:4762 53.05888:92 54.04806:608 55.01746:971 56.01188:235 56.04911:286 58.02293:1051 58.04131:85 59.04419:94 60.03089:68 61.52324:68 61.9479:133 62.01458:163 62.94412:159 63.96059:166 64.51907:54 65…	6819.12	11308.6	6209.12	7942.18	5051.66	4092.45	8050.15	6915.36	5545.82	10009.2	6495.46	13685.1	35714.3	15287.3	6162.65	26863.2	15098.1	10167.7	15927.2	14777.2	24359.2	17758.4	9093.28	9574.86	24306.5	22135.1	21963.6	17665.7	2087.41	15517.4	9209.97	14556.6	7078.17	15138	5544.97	14142.9	3602.57	14131.7	11517.4	11193.8	45065.4	14243.9	7523.33	36822	41392.8
677	Unknown	0.548	25.2	41.03829:75 42.04683:153 42.99915:169 43.05385:419 43.86944:13 44.5564:22 44.97918:173 45.01524:1008 45.08577:8 46.9945:469 47.05903:9 47.16429:5 50.01459:103 50.25146:4 51.02039:42 53.00136:201 53.03812:281 53.1585:5 54.00954:54 54.99941:23 55.5917:4 55.99942:45 57.28732:14 58.83327:5 59.03072:363 59.07677:33 59.7223:8 59.99534:170 60.69136:6 61.75563:12 63.95954:141 64.03258:91 65.03874:142 66.…	361.979	901.888	423.733	398.615	408.385	377.418	441.064	592.105	274.585	429.975	319.389	4383.46	5746.86	6937.4	1756.15	7232.65	4002.53	3990.82	4033.48	4322.49	6764.12	5114.28	420.245	619.171	5812.71	6000.13	5100.49	5824.15	320.687	2411.99	3281.09	739.11	145.686	297.851	238.742	686.385	360.074	312.361	699.939	487.95	7373.42	3039.83	372.718	10695.3	8232.14
678	Unknown	0.867	70.33	41.05625:2 41.5769:4 42.04647:51 43.01799:294 43.20309:6 43.25752:6 43.29098:9 43.78922:6 43.98927:181 44.04945:67 44.1099:17 44.32172:11 44.35085:5 44.45503:6 44.4909:9 44.59229:3 45.24922:9 46.01464:51 46.99425:361 47.96712:43 47.99493:59 50.10254:11 50.68329:8 51.02218:100 51.81847:3 52.28416:11 52.9824:51 53.02654:174 54.04679:47 54.19968:7 56.30185:3 58.07175:128 58.10672:2 58.44994:4 58.991…	1765.09	2094.75	1496.77	4618.35	1773.12	1593.84	2014.3	3163.43	3929.19	2197.79	2698.92	6776.52	11326.3	8451.92	4337.33	10735.1	9905.36	6889.41	4677.39	5135.75	8289.06	5678.62	2400.76	2570.72	10238.9	8491.21	7659.89	6449.12	2457.12	5924.36	6692.12	2763.22	1846.19	2627.32	1901.47	2716.61	2949.19	11300.2	4268.44	1894.21	11580.6	4710.37	2345.41	7583.95	13759.8
679	Unknown	0.148	33.63	40.98257:36 42.67803:5 43.05457:130 43.12669:5 43.18436:3 43.37898:9 43.98898:903 44.00812:268 44.09955:35 44.2239:15 44.26436:8 45.06458:25 45.20674:12 45.27802:13 46.18569:4 46.39179:17 46.43128:9 46.9949:549 47.55816:8 47.96708:62 47.99387:137 50.01528:140 50.28173:14 51.21847:18 51.64143:5 52.0306:304 52.05658:6 52.4745:7 52.64866:3 52.98328:215 53.10409:3 53.82695:5 53.97812:55 54.04572:142 …	948.456	1296.95	842.203	1503.64	649.764	597.56	898.854	1331.09	1473.26	1138.7	1041.67	2370.3	3868.26	2872.75	1735.61	3220.57	2891.44	2313.65	2052.33	2347.18	2941	2099.35	1076	1007.16	3172.46	3206.23	2691.09	2120.83	884.986	1966.81	2400.29	1261.47	785.854	905.741	726.377	1380.18	1431.8	3356.78	1806.8	864.995	3933.39	1841.3	838.231	2366.72	4614.14
684	O-Phospho-L-serine; GC-EI-TOF; MS; n TMS; RT	0.526	258.46	41.03857:775 42.99976:517 44.0075:2058 44.97889:959 45.01539:21352 46.01445:1497 46.99452:3296 47.013:1097 47.99394:220 54.00882:222 55.01775:5085 55.99436:388 56.02077:585 58.02381:705 58.99437:782 59.03072:14547 60.00167:596 60.03118:892 61.00958:1784 61.02774:286 62.00957:235 63.00005:219 63.02167:346 65.03735:277 67.0427:266 67.05381:404 68.02511:261 68.99338:816 69.03257:537 69.06963:193 70.…	74437.4	452280	70374.4	143599	12773.9	17933.7	153124	50983.6	60047	110945	33186.9	48558.8	288368	32084.9	9531.8	281631	21433.4	5805.04	96331.7	51467.5	299754	175596	217606	190181	248761	234190	213065	191247	3151.35	74411.1	8170.73	441485	49234.7	396791	38189.1	479673	15918.4	322046	432783	38459.2	419869	35768.2	24236.9	356321	491896
685	3-phosphoglyceric acid	0.504	583.16	42.04626:261 42.99944:2909 43.01762:1008 43.9891:3149 44.00764:2338 44.97867:2093 45.01543:24258 46.01476:1442 46.99458:2285 47.01232:1129 52.03062:262 55.01741:5326 56.00764:800 58.0231:442 58.99416:595 59.0309:15673 60.02093:261 60.03168:1323 61.0098:2901 61.02779:875 63.0067:323 66.02073:712 67.01784:531 68.04953:537 68.99545:363 69.0168:392 70.02327:1412 72.03883:8082 73.30473:509 73.3262:327…	74380.7	452350	70332.6	143546	12766.2	17935.9	153074	50966.6	60050.6	110966	33187.5	48593.1	288316	32085.9	9532.45	281714	21498.4	5823.85	96342.3	51474.9	299650	175585	217651	190285	248772	234136	213098	191378	3141.89	74400.5	8167.85	441496	49178.4	396756	38162.8	479708	15914.6	322035	432790	38458.4	419788	35752.2	24276.7	356354	491627
686	2-HYDROXY-4-METHOXYPHENYL PHENYL KETONE; EI-B; MS	0.067	17.8	42.03332:126 42.99915:122 43.01724:145 43.05423:876 44.97916:359 45.01513:414 54.04069:285 55.01891:4304 56.01094:186 56.04972:281 58.0398:288 58.9942:111 62.94383:126 64.96184:180 65.0372:120 66.04578:133 67.05412:546 68.04887:577 70.02799:602 70.07696:485 76.02816:333 77.02068:531 77.03748:588 79.04096:439 79.05334:131 82.02763:107 82.07685:318 86.04111:105 88.03374:124 89.04089:246 91.03953:36…	44206.2	257928	41075.8	75530	7439.3	10879	82875.7	30936	36673.6	59163.9	21188.2	29800.1	170241	18827	5997.16	152426	12772.1	3742.09	60471.3	30932.5	165058	100212	116111	103928	137802	126490	122195	107584	1585.87	38820	4371.05	244986	26398.3	218374	21827.3	280670	9129.4	171103	233006	24618.3	229600	20199.5	14390.6	206858	260095
688	Unknown	0.904	70.94	43.05353:40 43.52626:20 44.04906:67 44.1156:26 44.17519:12 44.97865:540 45.0152:1081 45.14148:11 46.05915:309 46.9752:18 46.9941:183 48.00061:155 48.98933:79 50.99769:29 51.26226:14 51.78474:11 52.03044:472 52.8032:19 53.00138:123 53.02517:279 53.29475:16 53.57476:17 53.98739:90 54.04614:384 55.04176:43 55.05396:773 58.02207:345 58.04224:53 59.80151:42 60.03779:732 60.17429:15 63.02309:105 64.941…	14920.7	13289.6	12261.1	17754	19053.2	12305	15736	14528.2	12811.3	16947	14936.1	14847.5	18009.8	20442.9	15297.4	16440.3	13033.4	16926.4	16589.6	17845.9	13865	15267.3	18661.2	11658.4	14966.9	16285.9	15008.4	16108.8	13972.6	14131.4	13714.8	17844	11251.8	16796.7	16804.6	18104.7	14085.5	15568.5	19065.3	17106	15123.9	13277.2	16386.8	17561.9	18009.9
689	Unknown	0.563	11.18	40.03045:13 41.03839:13 42.9998:530 43.05355:152 43.70085:15 43.98884:520 44.57716:13 45.01522:1816 45.23564:21 45.3471:20 46.01529:230 46.44893:10 46.99424:39 47.25648:15 48.99114:124 53.03352:283 55.01697:333 55.05334:618 55.17289:15 55.61364:18 55.99597:127 56.02564:236 57.93391:11 58.02216:274 58.65704:12 58.99454:323 59.03075:1240 59.0669:43 59.23955:8 59.39754:9 59.78664:10 59.88932:55 60.0…	3571.9	3012.91	3006.96	1919.38	3395.22	2777.65	2160.18	2792.23	1771.58	4228.25	2536.41	1303.47	2024.07	1161.25	998.204	1324.52	885.13	1229.52	1579.71	1666.02	1251.28	1456.68	3309.21	3260.86	1486.4	1370.51	1466.23	1424.95	2398.89	1420.39	1121.27	4446.06	3049.35	5113.99	5729.7	4372.06	2191.68	1136.59	3566.61	5198.85	1841.58	1339.12	3173.01	1710.39	2038.46
690	cysteine-glycine minor	0.556	49.48	41.03786:226 41.99219:365 42.04643:388 43.05415:438 43.98882:1334 44.00751:511 44.05854:75 44.97865:688 45.01541:5576 45.04065:207 46.01858:366 46.05859:99 52.03112:385 53.02632:675 55.01786:1357 55.05409:760 56.01426:458 56.06198:260 57.50111:87 58.02303:1665 58.02807:268 58.99442:478 59.03124:6094 59.05056:131 59.94929:117 60.95598:280 61.01026:1445 61.94477:103 62.00992:297 63.02225:267 64.960…	1391.59	9310.78	1043.85	930.076	1134.16	496.47	3331.52	928.199	896.032	2043.2	1342.13	1846.61	11032.7	1850.58	323.448	11240.3	684.725	828.132	4020.01	1530.5	14477.4	7697.01	2976.95	2397.66	6678.88	4852.84	4605.84	4716.53	159.416	1156.37	1107.55	11363.5	904.86	2804.49	163.693	32647.9	184.757	3525.36	18899.4	2787.48	28449.4	1637.39	1612.33	17623.1	22048.7
691	Unknown	0.837	22.45	42.04585:69 43.01743:2915 44.05771:76 44.09253:52 44.3683:30 44.97864:974 45.01518:11162 45.07919:58 45.15178:70 45.21388:57 45.24853:56 45.33674:53 45.35707:35 45.4765:26 45.61091:30 45.65289:56 45.9779:286 46.01428:1602 46.99417:3608 47.0116:912 47.04663:84 47.13088:29 48.01594:159 50.01466:22 53.00152:249 53.03757:677 53.98923:69 54.04656:439 55.01712:1642 55.13736:36 56.02433:287 56.0601:291 …	11487.2	28702.2	11770.6	5973.69	8948.71	6569.84	21256.7	7518.06	4686.11	16450.9	15326.8	3843.04	18327	5101.84	3145.68	7837.25	3698.56	6843.08	6919.65	4995.79	10035.8	7795.53	22233.5	18449.5	10606.9	10628.7	9794.9	7489.17	3291.22	3656.54	7924.19	20792	9429.75	27619.1	12392.4	24284.7	3241.06	5243.18	21358.8	19660.4	18282.7	16838.5	18593	10393	13524.3
692	Citric acid	0.867	8269.73	43.01748:2772 44.00762:3405 45.0154:18515 46.01477:1249 46.99482:2531 47.01206:558 53.03936:572 55.01768:505 58.02354:1817 59.03088:3561 61.01032:2683 67.01777:25811 68.99706:4989 69.01452:750 70.02284:2052 72.03854:12090 73.31479:545 73.34847:568 73.38466:625 76.02578:1371 76.04817:617 77.02235:1434 79.04109:782 82.03949:602 83.01222:874 87.02583:723 87.06159:1566 88.0331:991 95.01169:1134 96.01…	713229	1469295	727756	332856	503148	322784	1187861	406122	194186	985846	847068	174992	1022716	239005	121918	426458	153298	344766	307784	221014	524778	413236	1253880	1100864	583311	548236	506486	441915	143065	166978	417002	1306230	517578	1442528	660978	1404791	157298	264714	1165373	1205067	1024706	1006199	1138052	602048	716308
693	Isocitric acid+Citric acid	0.274	234.85	43.01736:2240 44.00746:3300 44.97848:1518 45.01512:18938 46.01471:1637 53.03816:622 54.99937:1605 55.05386:1895 56.02564:541 58.02258:1304 59.0308:5277 60.00211:738 61.00959:2741 66.02005:1061 67.01728:16408 68.02551:2292 68.99618:6716 69.0286:604 70.0228:602 72.03837:6317 73.31953:518 77.02183:2056 83.03073:1049 83.08492:1456 84.04525:636 86.05468:543 87.06184:813 88.03415:761 89.04067:649 95.01…	713249	1469388	727832	332818	503081	322796	1188817	406181	194185	985627	847650	174991	1022816	239197	122077	426463	153348	344924	307784	221039	525190	413245	1254294	1100890	583277	548648	506445	441927	208368	193291	5540894	1180850	20385070	3364162	696136	1425502	145642	235110	1204601	1084519	2090009	1193273	8502998	618681	655227
697	1,5-Anhydro-D-glucitol	0.948	30.71	41.0386:432 42.04505:626 43.01764:1563 43.05405:212 43.98924:1193 44.00715:602 44.04942:104 45.01541:6453 45.04056:144 45.43469:26 46.015:418 46.99443:969 48.07438:58 48.9922:216 52.0302:279 52.98383:57 53.03854:399 54.01092:234 54.03434:682 54.04552:1130 55.01763:811 55.0413:1810 55.05387:4568 55.07464:59 55.2826:30 55.78245:28 55.96954:65 56.0256:2788 56.04894:916 58.02288:1111 58.0739:60 58.99…	11738.1	12280.8	9450.45	6320.9	9170.43	5882.61	11638.4	7639.1	6159.52	12764	12257.4	17225.6	28717	21025.2	11207	25937.2	19885.2	16629.2	25116.3	23521.1	28275.9	29909.4	11435	10652	25619.9	20800.7	21217.3	21470	3533.98	22528.1	20156.3	12704	7971.03	14772.4	14820	16446.9	4897.41	12253	10225.4	19873.7	25822.4	18668	15938.4	25670.6	25186.9
700	Unknown	0.889	32.8	42.5729:12 43.05351:163 43.98889:686 45.11463:15 45.97739:101 46.99413:34 47.07984:41 47.72414:15 47.99569:40 48.20869:15 49.00654:106 49.05916:26 51.02208:377 52.03059:146 53.00147:145 53.03771:100 54.04666:16 57.95912:71 58.03643:1321 58.99568:12 61.05765:66 62.94522:31 63.96172:38 66.95772:92 67.05421:80 68.06019:153 69.06854:157 70.03172:143 71.99108:49 72.07681:26 73.1314:55 73.57156:37 73.6…	15504.4	9352.65	15992.3	3062.76	15808	12793.6	6378.25	12905.7	4661.32	8899.33	12159.5	6042.01	7483.48	6163.13	2054.85	4102.83	6616.32	5535.36	4021.78	5703.56	3142.62	3586.01	9841.21	8128.35	4664.65	5547.84	4720.75	5607.32	6515.1	3006.78	3939.4	11862.8	15135.4	18245	16413.7	7474.74	4929.93	6729.07	10212.9	16307.2	7062	1583.2	12264.4	4988.67	4424.41
701	Unknown	0.926	45.46	40.07879:9 40.8768:19 43.00022:545 43.22197:13 43.25836:13 43.98896:221 44.00728:269 44.04656:249 44.11387:18 44.28474:8 44.97847:703 45.01505:2612 45.052:207 46.97489:64 46.99485:397 49.00661:160 51.02227:317 52.03015:47 52.28317:9 52.46229:15 52.98419:148 53.03864:67 53.62734:9 53.98008:45 54.042:166 55.16969:9 55.26649:18 56.02716:147 58.02305:1486 58.06192:59 58.80942:11 58.99407:101 59.03094…	9693.86	15432.6	10876	10102	9901.06	7749.39	9437.98	9558.24	9857.31	11049.9	10594.3	9699.24	15715.2	10916.5	7808.93	13863.2	12166.3	10395	9330.68	11705.4	9583.56	7551.52	14345.8	11428.5	14115.5	13959.3	12151.2	10422.8	6823.55	9822.93	9125.5	18438	9654.91	17099.6	12185.9	14949.9	8767.5	10790.8	15334.6	11720.5	13811.8	7900.3	8404.6	17924	17467
702	Gly-Gly; GC-EI-TOF; MS; 4 TMS; BP	0.407	422.3	41.03842:278 42.03308:362 43.05353:472 45.01482:2467 45.97953:401 46.02164:417 48.99219:228 52.02956:221 52.98326:189 54.04668:306 55.01704:148 56.02128:252 56.06162:313 58.02252:890 58.06159:1735 59.03052:4390 59.98232:217 61.02952:295 63.02265:131 64.96113:187 65.03738:164 66.02016:103 67.04046:115 70.02233:185 70.07664:683 71.99123:143 72.03885:880 72.08726:215 73.22292:152 73.26828:157 74.090…	79479.4	109738	72284.2	68992.8	89513.8	92978.1	92735.6	133253	173056	170053	155888	86734.8	117789	123002	71313.7	71316.1	250849	135490	87228.4	96115.7	115828	72345.7	96580.3	109228	146391	128591	105576	79900.9	98416.1	84813.1	101788	89410.6	108179	124822	94058.9	111294	103914	103359	80994.2	104033	113576	108952	106478	136358	127162
703	Gly-Gly; GC-EI-TOF; MS; 4 TMS; BP	0.6	286.02	41.03897:580 42.04651:264 43.01717:657 44.0078:184 44.97879:667 45.01527:2790 46.01082:638 46.07418:136 46.99471:562 47.07823:144 54.00853:242 54.04565:252 55.01775:460 58.02327:726 58.06246:1722 59.03072:6590 59.06706:568 60.02565:153 60.03537:900 61.00992:694 63.02277:149 64.01802:159 65.03859:228 66.02185:175 66.04585:390 67.99814:195 68.04943:438 69.06868:742 70.02466:303 72.03884:722 73.2399…	79752.9	110114	72482.3	69219.4	89770	93532.3	92930.2	134071	173971	171011	156711	86855	118654	123384	71739.2	71519.6	252224	135793	87311.1	96606.6	116084	73024.7	97057.4	109607	147076	129296	105878	80112.6	98753.7	85173.1	102354	89726.2	108942	125375	94354	111998	104591	103934	81342.2	104404	114001	109668	106912	136961	128052
706	Unknown	0.667	25	42.03172:124 42.99944:37 44.00729:161 44.97892:39 45.31534:9 45.9784:81 48.07438:21 48.99077:53 50.01515:142 51.02198:264 51.97584:6 52.0303:467 54.04557:47 55.01726:196 55.18657:14 56.06152:298 58.07381:220 59.03056:478 59.03648:75 60.00612:57 61.00835:103 62.9446:62 63.00761:31 63.96137:87 66.03362:66 68.99382:14 69.03404:364 70.02607:75 70.58816:7 72.03804:97 72.37056:7 73.08369:38 73.21558:25…	2110.02	14269.7	1836.42	1336.81	1704.49	1359.5	4350.75	1934.75	2351.34	3684.06	1514.77	1388.27	4755.81	1384.25	698.26	2383.4	1533.92	1010.7	1912.25	1965.1	3512.22	1882.08	6478.61	7185.61	4436.47	3318.07	3299.06	2014.39	985.942	955.145	1021.74	12286.1	2295.98	9684.49	1800.11	14653.2	1259.39	2638.98	8877.69	2181.18	4723.32	1426.3	1892.75	5470.51	7440.74
710	Adenine	0.956	285.72	42.99926:128 43.98892:1184 45.01486:2596 45.0597:59 46.01497:204 46.99439:268 47.01258:135 47.06855:28 49.00673:44 52.00393:160 52.03088:125 53.9798:239 54.01971:77 55.01673:216 55.9943:325 58.02274:346 58.99557:53 59.03114:410 60.00815:132 61.00884:214 64.00646:50 64.96027:111 66.96001:57 67.01:72 67.99675:79 68.99356:199 69.95679:107 70.00988:185 72.0386:229 73.24335:57 77.02151:384 78.03367:57…	17465.8	25273.6	16174.4	35067	19627.7	16792.6	17189.3	23825.4	22173.9	31945.6	21854.3	19065.4	33613.7	31082.7	22934.9	29847.3	22150.8	15224.5	38005.9	33941.9	27646.3	17859	33076.8	26545.7	33772.9	30580	30169.7	22293	20865.9	20399.5	14471.8	23784.7	18489.8	27431.8	21826.3	26913.3	20657	63076	29935.7	25556	32706.9	23112.4	18945.5	35747.5	37895.1
715	Unknown	0.593	9.35	40.30202:22 40.98421:5 41.03803:1761 41.12597:18 41.72025:19 42.00938:164 42.04635:831 42.12143:3 43.05393:2702 43.1388:40 43.173:32 43.30735:4 43.34674:27 43.45422:16 43.73434:23 43.887:5 43.98908:345 44.05576:173 45.01463:64 45.23255:4 46.33462:7 47.99388:118 49.00632:118 51.89606:16 52.03069:112 52.98445:54 53.03891:175 54.04688:446 54.68293:7 55.00973:193 55.05397:1738 55.07388:22 55.14881:21…	2117.08	321.778	1575.55	1066.05	2222.8	1365.29	970.694	1950.16	919.216	1982.4	1587.63	290.976	1040.28	439.94	519.297	412.715	826.261	928.865	217.649	297.505	339.044	256.387	1896.89	1038.71	378.891	663.344	437.322	286.816	1769.55	590.642	616.033	575.023	1722.4	690.782	1665.99	617.94	2117.38	1281.09	1296.74	2188.69	574.879	637.019	1514.07	283.462	835.266
720	Unknown	0.578	14.45	42.04651:128 42.99912:115 43.81258:12 43.98897:897 44.19382:5 44.64468:9 45.7518:8 46.99516:709 47.02148:106 48.99024:147 52.2192:17 52.98428:78 54.04662:10 54.9985:308 55.97052:79 56.00682:24 56.10712:4 57.12983:11 59.20151:4 63.02324:94 63.2936:9 65.03893:140 65.27637:5 65.95599:66 66.0458:7 67.00187:107 68.99445:382 69.06973:126 69.38876:4 70.07719:557 71.16177:22 71.21883:14 71.6772:7 73.1393…	4422.43	6624.22	3892.83	2430.76	4671.2	2634.79	5031.81	3394.23	2461.56	4877.18	3963.37	159.874	542.895	331.825	215.29	278.698	406.866	449.049	308.697	252.624	380.39	425.302	5418.69	4867.82	360.77	418.882	428.095	302.919	2465.81	320.486	249.094	6269.9	4190.02	5338.55	5333.48	9208.23	3070	3771.28	5713.38	6540.01	335.885	256.849	4955.75	482.055	416.932
724	tyrosine	0.43	27.98	42.04622:268 43.98891:1108 45.01526:4373 47.01222:373 47.99476:236 51.02234:663 52.03076:787 53.00106:277 54.99968:284 55.0177:374 59.03076:4283 59.04825:319 59.07891:345 60.03139:987 64.95952:318 67.01891:236 67.05377:637 68.06203:393 68.99374:304 77.02226:623 81.03392:295 81.06959:625 83.0505:185 83.07001:413 83.08585:550 84.02599:496 85.99197:223 86.042:2231 87.04427:2016 87.0637:361 92.99166:…	114769	100188	94136.9	116051	140816	101656	119545	131346	119713	127934	142463	112456	143213	144350	112747	101173	137981	135064	114855	129678	98357.5	103070	132385	105531	114207	118758	105417	109827	126695	101601	111040	121464	103392	132404	138338	139329	126124	110009	125497	142304	105821	106077	131144	128356	125383
725	tyrosine	0.896	524.39	41.03835:258 42.99998:308 43.98933:263 44.00823:355 44.97881:323 45.01558:2694 46.01659:396 47.01212:157 50.01441:282 54.04445:204 55.99342:276 56.02445:184 58.02753:386 59.03095:2970 60.03651:731 61.01021:318 62.01492:199 62.94487:280 67.05331:553 68.99396:716 70.02272:452 70.07687:263 72.03835:1003 77.00414:221 77.02211:816 78.03307:257 78.04636:164 81.04843:227 81.05736:267 82.06284:279 83.085…	114822	100229	94177.1	116077	140830	101610	119596	131403	119766	127955	142520	112448	143278	144409	112764	101151	137977	135102	114818	129535	98399.6	103119	132443	105576	114256	118754	105388	109870	126717	101568	111044	121488	103400	132412	138336	139326	126151	110014	125496	142284	105779	106044	131157	128357	125391
726	Glucose	0.793	126.5	42.04594:115 43.98898:515 44.97887:480 45.01509:959 45.03304:182 45.9786:156 52.03118:175 53.0377:683 54.03449:212 55.05327:2415 56.06186:891 57.12338:70 62.9442:294 63.02198:111 63.94623:136 66.95591:119 67.01344:200 67.0543:686 67.99105:148 69.03283:94 71.10066:74 72.03809:783 73.31493:95 73.66508:73 73.7075:71 73.82645:104 74.48368:73 78.04566:372 81.07014:436 82.02714:306 83.04919:2182 83.103…	24607.6	13875.2	31329.6	1721.37	11448.5	5218.09	22941.1	4606.67	2133.24	77607.7	2380.22	2486.44	6824.89	2706.39	1472.62	3793.8	2885.74	2815.95	3341.28	3159.96	4471.94	4177.93	24606.3	22500.2	5036.9	3828.94	4084.96	2962.15	1006.03	2331.25	2987.99	6923.17	28107.8	8363.27	10342.7	46403	1490.37	6739.65	3995.19	39603.7	6116.73	3552.67	1852.91	4107.46	5667.01
728	L-(+)-Lysine; GC-EI-TOF; MS; n TMS; RT	0.874	60.26	42.99982:887 43.05436:1576 43.98912:791 44.00711:577 44.04945:322 44.97953:332 45.01539:5418 45.03305:225 46.01625:393 46.99461:978 47.0129:415 53.97955:201 54.03304:487 55.99535:148 56.02562:282 56.04862:740 56.06226:1238 58.02772:551 58.06262:448 58.99338:283 59.03096:12448 59.05342:254 60.01996:529 60.02992:2319 60.03519:1323 61.00974:654 61.02825:689 68.0245:426 68.99451:196 69.01379:275 70.0…	1729623	1488572	1375336	1676605	2192561	1642791	1608050	1960918	1651801	2043677	1872766	1735270	2016533	1865830	1656445	1595609	2128629	1971299	1663007	1859019	1496860	1568909	1861142	1605938	1840588	1838249	1661564	1545241	1539774	1511966	1353135	1725333	1303851	1737289	1793320	1309090	1668539	1573907	1578373	2020224	1334738	1540668	1513666	1481711	1876394
729	Unknown	0.904	360.21	42.03361:252 43.05374:4502 44.03282:535 44.97891:157 46.07185:121 52.00477:223 52.98568:220 53.9901:146 58.02309:3764 58.06183:1599 58.9957:583 59.07945:493 59.51009:139 61.05129:142 62.03768:1049 67.01677:170 68.06006:137 68.99368:152 69.03109:831 69.06617:774 69.09152:1698 69.95564:449 72.07488:385 73.33896:737 73.40006:302 73.49691:185 73.63738:127 73.78793:174 74.11532:136 74.23694:157 74.258…	86439.4	74501.5	70969.9	90916.1	118962	83023.9	80525.7	99534.2	84137.1	101240	96129.2	87780.7	101091	93058.3	81010.1	80815.7	107952	102220	82636.9	93298.4	75821.7	75492.7	94394.9	80704.8	95515.9	91712.3	84874.7	78025.4	96598.3	92926.7	76328.2	85204.3	81193.4	87165.6	100508	65335.3	101982	77771.8	81224.5	115998	73043.5	79082.4	94779.5	70027.6	86886.8
730	Lysine	0.844	123.32	41.03824:333 42.03396:254 43.00082:873 43.05404:905 44.00742:154 45.01558:4145 45.05529:285 46.01461:482 52.98436:243 53.0377:169 55.01786:668 55.05382:463 55.97153:348 56.02231:264 56.04618:590 56.06189:818 58.02279:1473 58.0619:1105 58.99707:522 59.0311:11463 59.07945:487 60.0035:196 60.03696:593 60.07538:283 61.01046:923 61.0284:434 61.03206:244 61.04217:183 61.09466:129 64.96059:169 65.01298:…	48159.6	205367	44464.2	29757.4	29503.9	24164.8	88150.8	31701	23570	63347.3	25887.5	27889.8	110739	25797.7	24946.7	84295.9	29037	26950.7	39117.4	34607.2	103386	67129.2	84122.7	71199.7	72280.2	69218.9	66477.3	58923.7	21238.2	28376.5	21330.6	159143	28343.5	167077	26560.6	157431	22295.6	57909.7	144131	28890.3	123966	27840.7	27626.5	103938	159840
731	Lysine_4TMS	0.193	187.22	45.01533:4475 45.05495:185 46.01514:183 51.02499:143 52.98436:234 54.04619:180 55.01742:799 55.99493:524 56.0496:440 56.0613:198 58.02358:365 58.07349:779 59.03112:10840 59.07839:260 59.095:144 60.03653:1457 61.02766:622 61.0416:238 62.0143:357 62.04901:300 66.02048:182 67.05428:478 68.02515:1192 68.06042:389 69.95565:162 70.02315:694 70.03847:1154 72.03892:199 73.30183:220 73.31932:308 73.36783:…	48159.6	205367	44464.2	29757.2	29503.7	24164.8	88150.9	31701	23570	63346.8	25887.5	27889.8	110739	25797.7	24946.7	84296	29036.9	26950.6	39117.4	34607.2	103386	67129.2	84122.7	71199.7	72280.9	69219	66477.3	58923.7	21238.2	28376.5	21330.6	159144	28343.5	167077	26560.6	157431	22295.6	57910.5	144131	28890.3	123966	27840.7	27627.4	103938	159840
735	Tyrosine	0.867	127.78	42.99963:198 43.05414:586 44.00709:301 44.97907:195 45.01547:2666 45.03379:122 47.01251:486 48.99097:197 52.98333:128 55.01669:278 59.03094:358 60.03354:104 68.99468:225 69.03488:192 72.02409:188 72.03902:941 73.15669:100 73.17221:111 73.26098:79 73.33398:67 73.35637:89 76.02865:402 77.02126:401 79.03955:548 79.05477:275 83.01907:233 83.0291:201 84.02833:297 87.04524:223 87.55328:91 90.04612:465 …	19801.5	100984	17380.8	35870.7	5855.54	5469.6	42085.6	16472.2	18084.5	24268.8	6794	8361.17	28925.8	8834.34	4479.36	34088.7	6229.5	5026.96	9697.17	7840.08	21223.5	12978.2	48128.3	43303.6	22917	21895.5	21355.6	19527.6	11536.6	9862.92	6563.71	124364	11412.2	57772.6	8742.77	122392	14103.9	51549.2	151142	10616.7	46017.2	7269.36	15304.9	60626.7	61646.6
737	Tyrosine	0.193	6.66	41.03804:822 42.0443:267 43.98898:539 44.00714:392 45.98505:234 46.01641:221 46.99483:321 47.99394:283 49.00676:222 52.03083:406 55.01761:331 55.99546:354 56.02516:442 56.06168:353 57.51328:79 58.02337:485 58.99501:254 59.98031:79 60.00178:264 60.02674:562 62.94529:185 66.95921:126 67.05389:753 68.01064:198 68.99442:137 69.03345:173 70.02399:112 71.99007:136 72.03966:603 73.25373:206 73.27432:186…	19830.3	100984	17380.8	35870.7	5855.54	5469.6	42056.1	16472.2	18092.4	24268.8	6794	8361.17	28910.8	8834.34	4479.36	34088.7	6253.19	5003.04	9702.53	7840.08	21223.5	12978.2	48128.3	43303.6	22917	21895.5	21321.9	19527.6	11548.3	9874.2	6565.32	124537	11417.5	57779.1	8693.55	122562	14122.6	51548.9	151143	10587.6	46032.7	7256.6	15327	60673	61638.9
740	Galactosamine	0.881	17.18	40.2074:9 43.05394:91 43.22109:14 44.00735:77 45.01504:635 45.12495:10 45.29752:12 45.65586:8 45.99621:73 46.01508:115 46.99401:403 48.99128:66 50.01461:79 51.02268:160 52.11039:8 53.03815:168 53.98225:78 54.0478:159 55.01755:346 55.054:34 55.13705:37 55.85681:10 56.14014:12 56.23344:7 56.32049:12 56.4131:7 57.30521:9 58.02825:278 58.99352:42 59.0301:358 60.05935:15 61.77721:16 66.0469:84 67.0176…	3050	4604.27	3227.02	1367.29	1955.05	1898.89	3737.83	2998.61	1798.58	3599.07	3787.79	4203.19	11549.8	6463.78	3881.77	6410.98	8206	8451.48	8554.12	6730.25	10229.1	7545.8	4866.93	4623.94	11490.7	10562.8	9914.48	5131.4	854.396	7817.88	7352.67	4432.38	3716.09	5210.36	4100.36	4353.4	1225.91	6228.38	3492.09	7975.78	8173.06	7876.94	5776.35	8999.79	9430.52
742	Unknown	0.859	25.76	41.10728:37 41.19338:3 41.39866:4 42.00925:126 44.10893:7 44.26353:3 44.43091:6 44.78334:7 46.01048:8 47.07716:16 50.01384:46 51.64646:4 52.27084:4 52.6155:3 53.02607:85 54.04549:15 54.41167:15 54.70847:6 55.19138:9 55.99425:52 56.02569:38 56.45974:6 57.98545:63 58.02942:350 58.9947:345 59.03075:505 60.00118:306 60.03236:115 60.14112:7 61.01043:436 62.01423:17 64.96151:204 65.03657:67 66.02239:13…	6894.12	11703.5	7112.08	8350.62	8176	5976.39	7714.62	8030.63	9290.56	11395.1	7667.78	7886.57	18815.1	11880.8	5938.2	13933.4	13869.2	9760.18	11254.1	9538.53	14436.1	11470	11021.1	9579.38	15303.6	13235.5	11251.5	8571.81	3416.05	8367.84	8758.73	15913.4	7092.19	11023.3	13681.7	14915	7843.44	6156.91	10410.1	11404	16731.2	10269.8	9218.95	17757	17610.9
750	Unknown	0.496	17.12	41.03822:314 43.25843:7 44.04811:41 44.26178:3 44.33704:6 44.80851:9 45.33395:12 45.98498:148 46.01043:78 46.25907:16 46.995:5 47.01341:48 47.96434:21 48.54292:3 49.0086:3 52.1626:9 53.79006:9 54.04603:3 54.2355:8 54.81963:14 55.72666:29 55.78761:12 55.8339:11 56.01189:106 56.06177:108 57.24762:5 58.0229:278 58.99612:85 59.06727:123 59.19161:18 59.4715:5 60.00248:111 60.0319:119 60.07425:728 62.0…	56.9132	33.5786	52.3839	69.794	49.6949	102.378	61.9831	42.8615	22.4129	11.9521	50.7925	2682.87	2893.7	2477.72	1848.58	2596.42	3630.99	3074.61	2546.72	3214.94	2249.78	1887.98	222.362	185.96	3573.26	2531.89	2337.54	1698.58	2073.27	1837.62	2059.17	47.5994	42.7995	51.4874	82.599	13.9388	92.136	48.871	59.6718	89.889	2201.28	1613.33	1329.61	2831.74	2186.59
751	Pantothenate	0.304	11.25	40.66796:12 41.03877:257 41.99224:31 42.04559:160 42.4476:13 42.99958:85 43.98944:2721 44.02516:334 44.0807:26 44.12176:45 44.19412:4 44.22196:21 45.01562:127 45.17028:14 45.99719:148 47.32444:24 48.07528:24 48.9907:93 49.08038:4 49.77708:6 50.01507:48 52.03101:386 53.02464:161 53.0386:89 53.50792:20 54.04641:247 55.0187:817 56.06218:99 57.2332:20 57.26351:8 57.59252:6 58.02385:141 58.81908:14 59…	640.208	2009.83	377.964	1193.07	443.017	313.529	1043.07	365.445	533.593	556.321	320.545	398.282	874.879	598.166	164.956	1546.18	421.288	340.821	537.011	506.164	840.38	472.32	1114.11	969.349	1080	946.129	885.017	536.946	296.89	605.389	399.809	2753.17	490.231	1111.46	724.667	2218.18	414.919	1953.48	2631.8	456.409	1116.38	532.54	447.905	2561.23	1932.29
752	Unknown	0.815	13.36	41.03867:166 41.99393:75 42.04576:123 42.10062:19 43.05426:411 43.98894:277 44.13749:18 44.30963:7 44.42434:7 44.97869:257 45.01523:206 45.19307:7 45.98494:30 47.20865:10 49.00738:183 52.03107:321 52.15638:23 53.22857:5 54.04521:21 55.91553:6 55.98915:42 56.06055:68 56.15514:4 56.26255:8 57.44351:15 58.0279:323 58.07294:187 58.33738:13 58.39267:9 58.83815:25 58.99262:169 59.03013:357 60.03486:146…	2207.86	4023.47	2455.06	2586.51	2126.11	1669.36	2140.95	3087.81	2417.44	2824.52	2431.21	3409.64	5023.11	2374.72	1643.6	4664.76	3128.58	2698.58	3271.09	2720.44	4549.5	3726.55	3489.8	3169.12	4493.68	3414.94	4299.06	3138.18	816.785	1823.52	1957.84	3465.55	1828.44	3508.82	2155.38	2902.99	910.522	4535.62	3291.54	2299.35	4142.02	2180.84	1990.43	4235.83	5930.99
753	Unknown	0.8	14.94	41.03818:197 42.97257:32 43.05363:158 43.17314:19 43.98895:708 44.1954:15 44.67902:6 44.97948:127 45.99268:140 46.99438:221 47.1202:8 47.96581:16 49.09292:41 51.02188:244 51.74228:4 52.03026:452 52.9833:55 53.03775:229 53.66466:2 55.0538:206 55.06753:394 57.36851:15 58.07486:91 58.98244:202 59.0313:237 59.22557:4 59.68425:2 60.03069:69 60.61999:8 60.97299:70 61.01141:317 61.07404:11 61.11348:4 61…	1480.29	2316.09	1499.95	1820.37	1237.82	1040.32	2083.77	1373.25	1142.49	2654.55	1428.49	3097.14	7560.93	4259	1759.82	5582.52	3096.71	2252.07	4194.14	2933.84	6079.64	4975.3	2042.2	2281.51	4384.9	4129.86	4180.72	3348.49	324.023	2132.55	2121.57	2782.23	1135.3	2480.63	1499.01	4518.05	667.894	2598.64	2569.24	2262.67	7559.75	3977.44	1333.71	8867.58	8541.43
755	Unknown	0.556	15.18	41.83646:4 41.993:23 43.00019:116 43.68585:32 43.98894:841 44.00643:265 44.05756:112 44.14441:4 44.24517:27 44.27559:6 44.41405:7 44.63288:8 45.0523:96 46.09469:30 48.99025:67 52.03077:665 52.23033:17 52.58939:10 53.03838:131 53.08286:8 54.03291:272 55.05432:354 55.26021:4 55.98101:211 56.00046:107 57.15066:17 57.29279:3 58.06262:143 58.87092:7 58.99445:243 59.95554:18 60.00253:86 60.76526:11 61.…	743.654	1364.15	770.113	1374.75	599.741	653.523	1033.85	1145.68	1203.05	1425.45	1045.02	681.284	1400.13	1000.25	435.483	1461.16	799.906	548.643	812.288	1123.88	1176.58	918.96	1154.89	1228.76	1223.25	877.654	836.801	749.577	893.199	557.393	558.864	996.538	636.558	1084.06	857.299	3265.67	972.356	1226	1900.7	847.981	1280.08	486.684	749.795	1795.2	1444.27
761	Unknown	0.556	36.55	41.99162:13 42.03385:81 43.66774:9 43.98905:218 44.21212:4 44.97856:309 45.34992:5 46.20858:7 46.97546:77 49.65607:5 51.49248:4 52.03002:204 52.08626:4 52.15038:5 53.03717:229 53.99163:29 54.03364:151 55.05383:159 55.24612:6 55.76628:6 56.06176:245 57.72559:6 58.02892:209 58.06302:242 58.21817:6 58.99428:149 59.11156:2 59.46996:8 59.64446:30 60.17439:10 61.94464:45 64.02916:25 65.03845:69 65.0788…	1253.68	1719.21	864.099	1941.35	546.602	573.475	1241.82	1301.22	1347.84	1362.15	1307.54	2498.93	2554.96	1146.47	1060.21	5926.72	1773.12	1139.28	1853.85	1948.29	3002.75	2559.27	2119	1790.77	3656.08	3837.03	3014.26	3198.97	373.41	3108.12	860.773	2078.26	700.288	1521.16	898.838	2388.36	921.966	4801.75	3083.88	1294.59	4032.92	2448.18	832.016	5841.9	4798.73
762	Unknown	0.422	30.3	42.01074:28 42.04511:111 43.05301:107 43.28198:6 43.98891:649 44.69119:12 44.97923:125 45.01487:248 45.04407:119 45.67149:5 46.01324:21 46.99448:456 47.14129:6 47.19288:10 47.99303:18 50.01471:317 50.67764:3 52.14657:4 52.32298:14 53.03252:363 53.99114:6 54.03348:116 54.99851:317 55.05409:245 56.02742:38 56.04874:141 56.06225:130 58.02293:263 58.96751:75 58.99626:181 59.03025:311 59.07797:58 59.1…	2697.45	3716.91	2373.38	1274.23	2624.82	1306.59	3259.52	1440.48	1281.19	3174.24	2164.35	108.543	132.635	30.0078	161.44	152.026	168.677	114.263	92.0871	132.592	108.191	93.9489	3131.64	2776.41	306.223	133.656	168.975	127.345	1708.5	153.121	227.872	3922.3	2147.04	4072.68	2853.26	6448.13	1442.83	1931.74	3685.63	3378.69	132.762	101.136	2380.57	110.505	208.66
769	Unknown	0.896	13.3	40.02911:139 40.55107:4 44.06304:40 44.10102:4 44.90671:9 44.94927:3 45.09028:4 47.64661:6 48.98865:25 51.02349:180 53.00231:27 54.03389:84 55.05373:96 55.1052:9 56.05963:63 57.16212:5 57.27934:6 58.59635:3 59.03044:86 59.06847:16 60.00119:101 60.03235:18 60.49864:17 62.99852:40 64.13004:5 64.52798:10 64.89777:2 65.03919:19 65.79566:12 65.9864:65 66.35382:7 67.1544:4 67.24017:9 67.73829:4 67.9580…	5421.47	6546.9	5638.27	6317.93	7295.69	5462.42	6696.39	7155.89	6156.33	7983.04	7989.82	7123.6	7857.4	8131.01	6492.95	6609.38	6988.13	7380.77	6630.13	7254.6	6719.32	6631.67	6715.88	6455.3	7073.56	7422.71	6654.43	6534.39	6520.71	6785.26	5685.86	7170.37	5264.91	8161.18	7714.08	6783.09	7139.16	6521.13	7219.9	8026.98	7135.7	6623.01	7226.55	7122.44	8436.19
770	Unknown	0.207	8.45	41.38781:3 42.70196:3 42.99931:47 44.04948:55 44.32692:5 44.48537:15 44.87332:3 44.97892:136 45.01534:587 45.99734:24 46.15126:12 47.14523:4 47.38375:8 48.98934:67 50.01488:103 51.14916:6 51.77662:3 52.01836:96 52.0306:286 55.01769:78 55.2967:10 56.01298:83 56.06212:53 56.42774:5 57.22474:21 58.20657:11 59.03034:634 59.33063:10 59.71392:2 60.02972:15 61.94672:20 63.02302:25 63.96051:98 64.96029:1…	1241.93	1654.3	1365.11	2661.43	861.831	698.302	1224.84	553.142	1727.77	1063.32	1000.35	557.218	1049.36	741.292	514.446	1041.46	764.562	743.999	865.803	802.031	736.251	457.707	1493.81	1184.67	921.137	1111.82	1014.6	883.392	1909.29	552.836	682.913	1897.45	1221.21	1624.97	1013.92	1250.21	2380.4	1520.66	1004.46	568.892	574.795	404.888	1968.69	864.081	827.716
771	Unknown	0.859	20.14	40.03233:142 41.03851:480 42.01007:78 42.09532:4 43.34951:3 43.81072:7 43.90044:2 43.98882:863 44.08971:22 44.33621:5 44.97853:83 45.01562:339 45.48665:20 45.9796:167 46.01596:129 48.25958:8 48.98334:77 50.01469:21 52.03004:183 53.13253:14 53.97958:49 54.41198:12 55.0534:534 55.6875:5 56.01188:35 57.8411:12 57.99398:30 58.02806:125 58.07377:160 59.03016:157 59.84555:6 60.03962:187 61.01022:70 61.…	1596.1	3654.16	1744.8	1573.74	1460.14	2171.87	1975.4	3698.75	2586.32	3066.35	2070.63	2223.56	8929.54	3984.54	2298.03	3967.05	5227.55	4304.82	4268.31	3705.53	6629.48	2944.72	3778.18	3543.68	7389.96	7882.72	7256.28	2618.21	847.314	4493.31	3237.43	3404.15	1990.78	3731.68	1851.28	2310.28	1659.21	5013.07	1885.14	3955.06	6435.11	3445.65	2902.49	5788.23	7623.05
774	Cysteinylglycine	0.459	231.07	42.03308:131 42.99925:591 44.00777:207 44.97896:212 45.01522:2829 46.01521:344 46.99467:132 52.03016:215 55.01689:114 55.05415:200 55.99337:163 56.02587:290 58.02338:824 58.99506:198 59.03081:2693 60.00222:129 60.02837:289 60.95587:112 61.00965:151 62.94641:175 62.97178:127 67.05346:113 68.01061:97 69.97404:363 70.02306:656 72.03864:1552 73.24393:97 73.30981:88 73.31754:87 73.37376:98 73.47906:12…	3132.26	28154.4	2722.68	2494.67	736.696	742.224	11224.8	1507.35	987.86	4795.72	1062.92	6604.59	66436.9	8317.31	968.659	44073.5	2487.23	1182.62	16621.5	7966.99	77424	28796.2	10214.8	9797.31	38491.2	37326.9	30747.2	23785.2	468.801	5725.08	2513.95	27877.4	1691.15	10433.7	1107.4	101082	567.497	16698.6	41729.1	2065.9	106373	5287.95	1586.61	97362.3	152434
775	Cysteinylglycine; GC-EI-TOF; MS; n TMS; BP	0.459	24.97	42.0468:228 42.99969:472 44.00714:389 44.04475:276 45.01514:1238 45.68002:19 46.2117:22 46.99445:824 47.99435:175 48.07441:87 48.9906:293 51.02277:166 51.503:21 52.12139:30 52.98401:211 53.03805:372 55.0174:532 57.52752:36 58.02224:273 58.52766:21 58.82208:19 59.0311:668 60.00321:181 60.07398:109 60.50487:58 60.95548:103 61.94718:37 62.01534:76 62.57177:27 63.02096:235 64.96049:21 66.04588:32 67.…	3132.36	28139.6	2723.52	2494.94	737.176	741.072	11224.8	1506.59	987.373	4784.38	1062.94	6601.09	66446.7	8317.18	968.925	44114	2487.58	1182.7	16613	7962.71	77421.9	28789.9	10215.6	9800.21	38503.7	37326	30757.3	23782.9	468.927	5726.49	2525.65	27882	1691.42	10437.6	1104.23	101088	567.602	16702.2	41735.3	2066.2	106404	5289.92	1587.12	97366.6	152505
776	Unknown	0.852	13.97	41.0383:127 42.03173:99 43.01754:163 43.05468:10 43.14319:9 43.31268:6 43.42133:7 43.98902:66 44.00652:50 44.06087:108 44.10155:38 44.18512:37 44.29648:4 44.97858:199 45.01519:557 45.08894:7 45.50375:8 45.81911:8 46.02246:203 46.1192:54 46.7248:5 46.80793:64 46.9943:415 48.99025:101 49.72736:3 50.01438:500 50.99682:158 51.02382:162 52.72398:5 53.03248:226 53.19708:8 53.33409:9 53.97814:22 54.0458…	2189.07	2246.96	2152.02	2282.8	2226.21	1506.02	2243.97	2352.02	1781.56	2030.91	2306.34	2285.9	2792.73	2319.09	1914.91	2794.91	2201.63	1745.6	2462.5	3092.56	2591.5	3084.32	2283.83	2247.12	2024.28	2296.28	2809.2	2594.37	1672.35	1753.64	1556.09	2889.21	1571.53	3211.41	2648.35	3015.4	1296.67	2875.33	2918.6	2433.78	3662.81	2259.58	1632.05	3825.69	3448.49
777	Unknown	0.733	89.28	41.99147:52 43.05395:274 43.6665:8 44.02566:57 44.27005:11 44.37469:22 45.01511:253 45.99533:155 46.42385:8 46.48886:6 46.69181:19 47.57429:23 48.07349:39 48.24057:5 49.24125:5 50.99776:114 52.02972:67 55.01706:233 55.05382:261 56.0078:55 56.32271:8 58.06145:163 58.86233:7 58.9939:179 59.21363:15 59.25047:14 59.82898:4 60.0023:238 61.00935:421 62.01535:112 62.45192:13 64.03134:48 65.03644:106 65.…	3524.87	4650.41	2246.69	5689.41	1304.84	1439.27	2927.84	3148.8	3094.59	4001.03	2380.22	6636.4	8745.02	2174.17	3004.01	19075.4	3338.9	2057.83	5671.57	4577.56	6946.72	7755.18	4318.44	4906.15	13200.9	9695.53	10733	10662	709.799	7872.43	2386.86	5907.14	1742.2	3970.86	2498.28	7350.34	2126.23	13664.9	9870.66	2716.16	14867.8	7164.77	2142.93	20824.6	14352.5
778	Unknown	0.756	18.81	40.83659:6 41.03864:91 42.99948:92 43.05455:271 44.20184:23 44.56006:21 44.9782:85 45.01493:189 45.22357:4 45.99621:142 51.40398:3 54.03391:324 55.19343:10 55.98095:76 56.06139:254 57.31562:3 57.34158:9 58.06253:438 59.37922:7 59.59066:2 59.74666:3 60.03537:65 61.01004:473 61.94682:30 62.94505:45 63.02303:5 63.9596:37 64.13525:6 64.94158:43 65.03721:133 65.95818:107 67.05372:25 67.32548:7 68.0481…	3583.11	7703.45	4368.98	4941.42	4735.83	2775.26	5361.6	3851.24	3508.76	6576.77	3623.06	4195.7	5304.76	4805.21	2828.01	7068.78	2758.19	2389.49	5822.5	4666.24	5093.06	5613.77	6182	5356.41	4622.17	4940.81	3840.75	4404.28	1424.94	3385.97	3327.45	8280.46	2661.42	6102.58	4592.98	7290.16	2550.3	2624.95	6796.12	4898.01	5598.02	2674.45	3810.84	7886.79	6242.47
779	DOPA	0.044	14.28	41.03826:183 42.99939:406 43.05356:303 43.98928:1294 43.99939:203 44.02568:55 44.97864:229 45.01487:398 46.01501:39 46.99432:381 47.99387:72 48.07482:54 49.9969:126 50.01648:221 51.50348:66 52.03028:247 52.98397:96 53.02589:167 54.01055:67 55.01864:318 55.05354:138 57.99692:91 58.02261:256 58.99491:170 59.0308:589 60.00131:47 61.00984:239 63.02315:295 65.03713:268 66.02056:125 66.99871:76 67.0539…	6862.89	16598.3	4134.63	3479.24	4644.01	4840.03	7969.55	6418	3825.61	7907.02	6642.9	3717.22	7138.95	3966.41	1872.85	2707.81	7731.96	4270.25	4787.05	5426.47	6172.74	4743.86	9941.48	10102.9	7054.98	5805.26	5386.89	3565.61	2640.78	2606.51	2960.11	11991.9	7447.15	16017.1	5518.42	13218.1	3402.43	6135.52	7865.29	8633.41	4540.54	3589.7	6972.93	5434.4	6505.19
780	Unknown	0.037	17.71	40.07507:7 42.00993:65 42.17323:4 43.98919:1333 44.22226:5 44.97896:461 45.11451:4 45.55126:16 46.03616:201 47.20047:11 48.07444:136 49.76148:2 50.01593:325 51.16163:9 51.29024:17 52.0185:223 52.03022:550 52.05259:391 52.67579:25 52.98439:140 53.03851:281 55.05426:388 55.20884:8 55.65335:3 55.99427:26 56.17125:15 56.45743:4 57.52735:72 58.45919:26 59.03057:611 60.01142:156 60.0322:183 60.03804:79…	96649	103165	89274.9	101042	91909.7	82278.9	109847	116954	70028.2	92250.8	101722	84002.3	95668.4	84778.6	84924.4	81414.2	101956	86282.8	80471	117872	83059.8	77844.1	106025	93466.3	101626	93114.8	90783.9	80148.5	88796.2	84937	67272.1	86581.7	82577.8	107444	83860.6	83386.4	62874.8	96499.3	91889.4	83510.9	69560.2	72819.6	80785.6	85494.8	80697.1
781	Unknown	0.911	22.73	42.00925:22 42.99797:173 43.05404:100 44.97933:508 45.01503:807 45.06911:25 46.0147:187 46.99427:586 53.03863:81 53.98001:87 54.04814:28 55.01757:283 55.05397:215 56.02015:190 57.98564:20 58.99437:75 59.0307:742 59.58281:10 59.79092:14 59.96535:70 60.00166:164 60.02997:136 60.95432:10 61.01009:176 63.00602:114 63.96093:131 64.95984:41 65.18594:22 66.01658:22 66.04578:90 66.51981:28 67.01674:48 67…	1283.75	6366.77	1461.86	1711.57	1036.51	688.411	1710.68	1073.4	933.314	1376.61	825.513	1341.39	4739.43	1276.49	969.582	3455.44	906.071	929.379	1311.2	1319.3	3897.53	1999.99	3384.77	2770.68	2770.55	2205.97	2102.49	2661.09	909.574	777.104	754.876	8580.46	799.991	5541.44	968.378	6350.24	830.974	3587.09	7039.58	926.535	7941.18	980.422	1221.46	4473.19	7628.76
782	Unknown	0.956	1133.49	41.03807:2364 42.04603:709 42.99991:667 43.05388:3874 44.00673:1454 44.97884:641 45.01517:12268 46.01553:988 46.99466:2829 47.01127:562 53.03878:649 54.04578:1144 55.0173:3525 55.05381:5507 56.02538:683 58.99486:2525 59.03063:9213 60.00161:1390 60.03202:545 61.01028:2536 62.98941:870 66.02209:491 68.02548:515 69.033:9479 70.02332:1254 70.03597:800 72.03798:3702 73.36662:484 73.39098:559 73.41665:…	698920	733104	627260	684381	695841	584131	749108	805090	529777	700437	735391	627008	689461	627682	617457	624252	748102	631252	615665	848933	591917	567835	772543	685751	738400	707701	639569	578567	569605	581622	430454	648866	500960	694420	677264	599072	461045	697256	674185	636819	496044	502089	509672	616386	641364
783	Unknown	0.881	49.32	41.08623:30 41.99139:73 42.04635:650 42.99995:480 43.0539:702 45.01513:3612 45.0332:99 45.09708:78 45.26039:60 45.33381:32 45.79036:31 45.98534:512 48.99153:239 53.02558:93 53.03751:579 55.99534:295 56.04622:1078 56.06139:316 58.02442:1159 58.07134:397 59.03075:3013 59.05039:53 59.0875:99 59.18312:50 59.22034:37 59.96411:69 60.95594:89 62.0158:371 63.00578:120 66.03435:282 67.04012:153 67.05389:6…	36899.2	56849.9	25736.4	7490.32	67136.4	15222.5	15854.1	9391.57	5867.53	40348.4	13215.8	7445.23	6515.48	6269.01	5810.5	6650.56	7961.81	6556.99	7195.51	7588.18	5422.86	5308.05	29859.1	21283.3	7156.83	6749.25	5965.21	4977.73	6433.58	6785.19	4797.45	76352.2	32036.9	47058.8	18928.7	30000.9	5451.64	5511.22	23966	62817.3	5361.6	4896.51	25873	6386.37	5087.41
791	Unknown	0.881	82.26	42.01019:190 42.04631:151 43.0178:611 43.98895:921 44.00763:308 44.04852:156 44.13373:15 45.0635:33 45.52597:21 45.99597:184 46.99502:378 47.134:31 47.98237:109 48.98916:92 50.01437:82 51.10434:46 54.01045:86 54.03191:194 55.01757:440 55.09479:13 56.02338:510 58.06537:58 59.03038:888 60.04555:163 61.01007:220 62.00133:173 62.0101:148 66.02029:193 66.95782:71 67.19925:9 68.99268:367 69.03233:497 6…	11342.2	17585.1	10161	7907.41	7637.46	5613.92	11378.5	9313.64	7907.62	14408.3	10959.6	17461.9	35232.6	19846.5	10350.6	33953.7	15038	11398.3	19658.3	18885.6	28529.4	23001.8	14098.6	11918.1	27173.8	22922.5	22562.4	22497.9	3683.58	15982.5	12456.5	14059.4	7944.67	18836.6	10724	21547.9	4575.08	15991.1	11593.5	13865.5	29504.3	15097.9	8618.65	38580.6	36949.2
793	Unknown	0.6	57.27	43.05437:607 43.9889:836 44.046:7538 44.26697:25 44.3859:17 44.84295:18 44.97862:467 45.01501:1770 45.05254:362 45.62312:11 45.99304:193 46.99423:572 47.04567:48 48.07251:31 50.01428:268 51.0215:135 52.03033:127 52.6409:23 52.98288:162 53.03931:340 54.04608:170 55.74213:12 57.38381:16 57.99585:85 58.0233:518 59.03094:1326 60.07397:158 63.96157:84 64.96412:27 65.03736:253 66.02003:173 67.00068:40 …	110.046	116.837	95.4119	216.915	159.675	150.653	152.214	134.4	148.074	152.144	267.655	16774.1	15399.2	18540	12843.8	16432	17972.5	16936.5	12853.2	16621.6	11194.6	12351.8	1204.62	1167.99	17061	15343.8	12539.7	11846.3	11971.7	10656.3	12181	157.91	142.587	210.689	142.094	219.097	173.628	294.094	135.699	143.682	14601.3	10304.1	8999.79	19493.1	14957.2
795	Unknown	0.489	123.68	42.03233:279 43.98881:722 44.00723:1713 44.39891:16 44.97803:538 45.01553:1570 45.06458:114 45.24743:31 45.98626:32 46.99432:628 49.00587:16 50.01503:149 50.979:15 52.03032:277 52.98432:72 53.10431:24 53.99114:72 55.01694:264 55.05344:826 56.02542:342 57.19664:20 58.02832:138 58.06235:328 59.03022:1052 59.0677:855 59.96645:33 60.03357:150 60.07389:15119 60.09574:165 60.11937:60 60.14533:49 60.283…	175.296	114.42	160.233	104.605	222.36	156.535	134.943	172.378	211.908	99.668	130.833	22800.5	21031.6	27765.2	19906.4	21348.9	24714.7	28853.1	16477.3	25388	13636.9	15000.4	1511.45	1388.13	21413.8	20114.7	15266.5	14866.7	18454.7	12122.9	16858.2	113.759	89.0666	121.049	205.73	128.6	180.024	179.212	127.261	132.162	15516.3	14117.7	11431.6	21986	18253.2
799	D-Ribose 5-phosphate	0.815	12.94	40.02968:30 41.0383:61 42.04856:50 42.99989:284 43.87418:7 44.04853:56 44.11916:9 44.20021:27 44.97854:498 45.01541:225 45.83984:5 46.01411:69 46.23338:11 46.53189:13 46.9945:140 47.9939:104 50.01485:65 52.20353:5 53.14825:7 54.03396:130 54.04711:125 55.0538:338 56.04802:61 56.06128:20 56.44225:6 57.16724:10 57.30933:7 57.67512:10 57.78874:10 57.98644:141 58.02416:242 58.10044:16 59.03043:785 60.…	3904.91	6884.81	3548.9	2207.33	2742.38	2663.82	3070.59	3196.83	1982.74	4476.15	2894.45	2089.92	5944.56	2716.16	1451.6	3576.38	2344.38	2022.86	2657.32	2511.61	4575.65	3406.94	4804.83	4257.51	3975.32	4207.85	3840.39	2553.97	981.672	1998.23	1928.14	4673.81	2907.93	7252.62	3247.58	6401.98	1444.9	3733.28	3805.51	4041.12	5428.15	2549.94	2384.69	5929.9	5983.35
802	Unknown	0.837	36.85	42.03692:69 42.99936:262 43.05391:320 43.98866:215 44.05598:54 45.0147:255 45.20095:7 45.99251:222 46.99444:77 51.00877:156 52.03028:49 52.50576:102 52.98242:25 54.50328:36 55.01744:138 55.16994:17 55.84349:6 55.99441:28 56.0482:32 56.06108:407 56.36237:4 56.40564:6 57.19726:28 57.26135:30 57.50003:24 57.714:16 58.02877:154 58.07278:295 58.1033:2 58.35427:3 58.99517:60 62.10461:8 63.02137:25 63.9…	1398.77	1324.99	1187.75	2637.2	1796.69	1597.01	1227.7	1697.68	1321.38	3153.88	1939.03	1124.18	1194.71	1799.77	1640.7	1136.2	1382.63	764.207	2336.71	2282.54	1270.46	763.805	2262.18	1610.66	1525.64	1633.79	1482.12	1069.39	1399.42	1132.34	607.106	1538.38	1952.03	1926.4	1921.18	2837	1624.93	3089.61	2622.51	2690.23	1085.88	1615.41	1578.51	1843.72	1189.86
804	Unknown	0.763	26.32	41.03854:176 42.01008:121 42.04644:201 43.05375:541 44.00739:120 44.65167:38 44.97807:415 45.01462:344 46.52942:62 48.98936:212 50.01498:285 51.02234:234 53.03888:318 54.07878:26 55.05346:64 55.82072:17 56.04921:113 57.26932:28 58.06972:124 59.03109:133 59.06319:191 60.04142:106 61.01037:265 61.02751:86 62.97937:60 65.03858:95 66.03133:155 66.97496:29 68.02431:86 69.03391:167 70.06435:132 72.0380…	19277.1	7460.3	17648	10673.7	14967.5	11652.4	7721.58	19100.6	10059.1	20654.7	16026.3	4603.49	14236.9	7271.5	3721.76	5947.58	5352.77	8791.1	6564.84	4905.47	7794.13	4481.99	12383	11827.7	7333.75	9346.82	9250.03	6259.08	14027.1	4709.28	4931.61	6259.87	17140.7	8631.6	18119.6	7118.81	11617	16152.5	13082.9	17952.2	10442.1	6081.42	12155.4	7165.93	8516.38
806	Unknown	0.57	211.79	41.03847:574 42.04631:147 43.01752:7408 43.05381:1751 43.98893:147 44.00798:191 44.05677:156 44.97902:578 45.0152:3971 45.02739:56 45.98624:456 46.01495:280 46.99472:782 50.01468:95 53.03804:344 54.04611:118 55.01801:1052 55.05383:1519 55.99639:232 57.99264:47 58.01588:82 58.02203:373 58.99411:614 59.03035:3078 59.98133:164 60.0312:233 61.01036:695 62.01535:99 63.00669:184 63.95988:64 64.03142:91…	52802	37665.8	39693.9	26077.8	42522.8	28738.1	33053.7	26595.9	22283.7	26375.7	21223.1	412.763	470.396	344.811	521.313	374.557	586.966	428.226	473.983	679.953	461.218	275.504	42313.3	34660.4	394.594	346.456	487.004	443.839	9823.96	364.292	237.998	43886.4	30000.3	37983.6	31515.2	46665.8	20660.8	30956.1	34178.5	25024.6	323.943	358.24	13860.5	540.461	470.191
807	Unknown	0.496	29.2	42.59035:4 43.05358:517 43.09085:19 43.98874:647 44.00749:163 44.15865:18 45.0154:705 45.65484:18 46.15223:2 46.99442:28 47.13192:9 49.17528:2 50.54566:6 52.00369:55 52.19347:5 53.02554:343 53.29568:22 55.01743:72 56.02469:173 56.17977:3 57.99911:66 58.02382:167 59.09206:32 60.00339:294 60.03087:192 60.0929:37 61.00997:409 62.0088:91 62.99135:99 63.58411:2 64.94266:8 65.12342:10 66.01891:127 66.6…	10310.7	6792.12	7301.35	4797.32	8417.69	5154.17	6169.83	5982.85	4225.73	4531.95	3485.49	578.071	906.085	559.777	556.932	703.874	461.901	511.93	762.523	779.5	528.583	592.146	7650.85	6789.96	935.426	847.968	882.057	446.98	2041.64	456.883	494.58	8457.03	5172.18	7648.69	6202.45	8237.14	4109.92	5605.45	6022	4622.93	574.566	514.494	2996.79	646.824	683.481
808	Unknown	0.837	330.25	41.00104:15 41.21919:3 41.77859:5 41.99142:113 42.03344:4 42.22614:4 43.01754:425 43.92654:15 43.98886:30 44.02266:503 44.09053:26 44.21293:7 44.7023:20 44.92223:6 44.97905:7 45.0152:683 45.33388:12 45.97843:7 46.01423:15 46.97514:37 46.99447:581 47.23552:3 48.94456:5 48.99212:13 49.40326:2 50.01447:74 52.03005:168 52.91776:5 53.03868:194 54.03304:139 54.04708:31 55.24974:5 55.35291:2 55.97155:29…	2458.75	3965.32	2215.61	2544.96	4904.53	3717.17	2568.86	5530.76	4064.95	3913.21	5475.6	3155.18	4058.59	3308.5	2888.67	1966.71	10095.7	5826.41	2764.32	4309.98	2934.56	1956.25	4012.79	5161.57	5427.68	4042.1	3315.77	2274.66	3969.01	2804.74	3112.36	4218.46	4322.79	4317.76	3726.71	4845.33	5391.94	3995.11	2917.64	4528.88	3302.12	3543.32	4857.24	3883.77	4285.91
809	Unknown	0.563	110.82	41.03816:277 41.47892:11 42.04604:177 43.84515:24 43.98884:562 44.06308:80 44.40326:11 44.7577:11 45.99344:182 46.01605:139 47.54946:8 47.99583:17 48.99075:8 49.01915:29 50.01507:323 51.02269:464 52.02981:501 53.00334:50 53.98211:86 54.04817:115 55.01787:202 55.05387:206 56.00573:90 56.06235:71 58.02816:428 58.07318:144 59.03053:534 59.06915:504 60.03611:267 60.07396:7523 60.09405:142 60.12505:67…	95.5649	83.9025	61.7443	76.5296	125.073	64.9879	45.9748	31.2028	145.425	118.982	112.126	13259.8	12359.6	14977.8	12013.5	13092.7	11702.5	14888.8	10939.9	14711	8449.44	9302.77	1199.46	1201.66	11924.4	11926.3	8516.26	9667.52	9965.7	7199.22	9002.21	69.895	92.5443	73.6912	145.632	104.529	83.1229	130.569	84.7841	107.829	9176.17	7742.95	6252.56	13255.1	10306.9
810	Unknown	0.207	32.48	40.01741:12 42.046:148 43.00014:117 43.30117:6 43.38035:3 43.98913:579 44.00685:108 44.04673:57 44.61436:10 44.71058:3 45.0151:191 45.98728:78 46.01843:169 46.99439:304 48.99071:119 50.01507:213 51.0231:88 52.03033:129 52.26132:18 54.01054:221 54.03292:110 54.2503:15 54.39337:6 54.55076:5 55.01741:277 55.05387:144 55.59552:4 56.06152:203 56.1866:6 57.17807:9 57.21946:32 57.75205:5 58.02837:189 59…	1435.75	1483.96	873.701	881.07	1783.98	1425.41	1090.4	2335.91	1951.34	1364.08	2125.88	1023.72	2029.41	1248.26	1021.45	922.278	3663.48	2276.98	1084.73	1754.52	1320.44	1004.32	1721.45	1606.84	2073.75	1566.17	1793.06	1012.49	1728.91	1317.26	1343.15	1491.86	2142.11	1766.84	1526.02	1524.3	1938.63	1315.92	877.678	1918.1	1763.28	1786.55	1876.29	1201.21	1911.79
811	Unknown	0.341	85.59	40.02961:10 41.03873:254 42.01015:94 42.99948:228 43.98874:421 44.00742:100 44.04856:231 44.1093:31 44.9781:527 45.01537:379 46.01587:214 47.11884:4 49.9909:42 50.01415:101 52.03043:392 52.0567:14 53.03381:255 53.10335:14 53.97202:60 54.03202:82 56.00802:40 57.27292:20 57.31633:16 57.57488:8 57.99068:34 58.02638:227 58.07349:55 58.52368:9 59.06721:159 59.87111:4 60.01145:44 60.08833:26 60.19472:3…	49.2083	85.0978	17.2209	63.5868	71.9819	38.0184	52.8342	37.5535	156.264	76.8578	73.8625	3636.65	3888.41	4323.5	3649.02	4525.04	3557.44	3858.01	3042.5	4936.01	2384.11	3227.17	359.714	340.052	4094.7	3060.17	3111.45	3093.54	3712.04	2629.82	2980.45	38.3032	20.6733	83.4663	57.2129	42.3437	72.1441	60.6775	67.0476	40.4974	3369.55	2397.74	1875.01	4382.93	3163.52
813	Unknown	0.689	31.73	40.03061:86 41.15607:7 41.63189:6 42.00944:202 43.00025:75 44.12464:19 44.17516:25 44.23156:19 44.75885:10 44.97846:300 45.01504:221 45.53999:7 45.60535:6 46.17367:11 46.99452:232 47.0684:7 47.18505:9 48.99163:138 50.01519:149 50.19355:11 51.02309:356 51.73374:9 51.91101:10 51.97532:8 52.03068:592 52.09948:74 53.03859:164 54.81173:6 55.18645:12 55.47226:2 55.59074:3 56.08915:34 57.77525:9 57.8696…	1380.94	1821.77	1228.41	1038.18	1525.36	986.96	1488.73	1076.03	954.043	1828.64	1348.06	2979.84	5229.38	4602.56	2712.57	6516.93	4062.36	3455.71	4158.57	3598.76	3869.92	3335.81	1968.29	1487.42	6224.88	5473.99	4389.6	3784.03	965.902	4691.18	3843.99	2246.44	1370.27	1818.84	1645.59	1900.25	1226.56	1650.45	1445.62	2000.12	4957.74	3731.56	1247.82	9899.01	8276.08
814	Unknown	0.422	8.86	41.13395:6 42.60903:39 43.05409:551 43.22131:45 43.33173:12 43.42246:10 44.00182:148 44.12476:6 44.1803:10 44.24435:31 44.35547:19 44.55832:15 44.67348:11 45.01522:863 45.34698:6 45.37492:7 45.98688:296 46.01411:355 46.47459:5 47.96604:127 48.07434:54 50.01492:314 51.55411:4 52.02984:328 52.57543:11 52.66568:5 53.00141:92 53.0251:83 53.98841:73 54.04625:610 55.05418:1741 55.07554:48 56.00664:243 …	8551.02	15988.8	7143.17	9096.62	4666.67	4376	10885.8	6526.67	6592.11	13238.7	6616.72	19550.7	68306.9	25187.9	10769.2	28836.9	20954.9	15596.6	32565.5	22392.7	44241.7	34403.3	11275.4	11576.1	40214.2	38666.2	34786	28434.8	1532.86	14976.8	14002.2	12490.8	5707.69	13297.8	6795.36	17972.9	2777.05	14304	12137.3	9927.42	53584.3	23309.2	5511.85	55384.8	49892.8
817	Glutathione	0.711	24.03	40.01825:110 41.34968:5 43.00069:103 43.40896:8 43.90645:11 44.11633:10 44.52433:11 45.15811:18 45.74738:10 45.99346:88 46.16121:8 49.0067:68 51.05996:9 52.71592:5 54.03307:459 55.0173:251 55.50516:14 56.81554:6 57.10356:100 57.21017:9 57.38296:22 57.99058:51 58.02317:323 58.99541:191 59.03126:136 59.07563:17 59.22602:5 60.00285:24 60.0742:222 61.01022:137 62.00454:54 62.94529:47 63.96107:34 66.0…	1976.84	7703.01	1519.78	743.866	519.206	403.055	3888.32	906.728	1024.17	2658.85	805.722	1213.96	6197.74	1481.72	516.289	4545.01	1141.39	590.826	2242.72	1615.33	7082.68	2801.41	3063.47	3944.35	5301.68	5525.66	4692.17	3246.82	219.581	1387.49	714.043	6155.02	1181.85	5111.23	898.613	12208	282.868	3053.86	6218.41	1378.98	6998.89	903.094	851.281	12860.8	11988.2
819	Unknown	0.259	21.61	40.73132:3 41.03836:2299 41.88998:4 42.01192:202 42.0459:461 42.35588:18 43.05387:562 43.07285:80 43.10595:6 43.13288:13 43.19535:14 43.79194:29 43.88269:12 44.0562:58 44.13779:14 44.23933:2 44.26586:8 45.06256:23 45.99248:38 46.01866:237 46.08628:22 46.96787:3 50.16597:6 52.03051:495 52.98378:156 54.02178:117 54.04616:357 55.07543:76 55.17571:23 55.23616:23 55.35479:27 56.06167:54 56.16009:23 56…	1010.2	1714.92	943.486	739.25	927.342	957.974	1073.88	827.067	813.669	866.291	890.751	2882.46	5443.51	3493.95	2357.06	5123.41	2891.97	3228.92	4518.32	3410.54	3540.3	3233.24	1438.39	1108.12	5486.73	5154.45	3932.39	3911.43	557.159	3055.92	2578.26	1426.32	885.962	1068.31	1011.02	1259.64	677.739	1081.31	1191.34	1364.3	4192.91	3336.84	645.068	7680.74	6927.66
822	Unknown	0.763	11.8	40.02966:174 41.03845:2734 41.07811:78 41.22878:30 41.26611:18 41.61583:6 41.72298:5 41.92584:11 42.04618:305 42.06339:9 42.16715:13 43.054:3544 43.19444:56 43.22228:71 43.23786:65 43.25788:42 43.27739:40 43.3732:21 43.44483:8 43.48175:32 43.51997:7 43.63932:31 43.81196:6 43.86311:32 43.98916:293 44.03101:96 44.05718:175 44.14303:26 44.23358:20 44.46346:9 45.01502:265 47.06559:26 50.09546:43 50.6…	1925.97	4790.93	1414.85	1656.06	2411.75	2215.75	2152.54	3534.7	3120.79	2706.26	4328.83	2260.18	5022.57	2245.67	1988.09	2870.85	7824.13	4064.73	2620.05	3001.12	3659.81	2067.92	3894.74	4225.64	5227.63	3433.19	4876.55	2219.59	2337.08	3621.32	2319.53	3187.37	2644.25	4847.12	2682.77	3023.41	2408.49	3552.68	2225.58	3040.72	5080.46	3553.05	3099.24	3851.02	6682.7
832	Unknown	0.904	38.9	41.25836:7 42.04631:60 43.54802:10 44.09433:22 44.97875:412 45.01481:664 45.0792:5 45.39773:7 46.71436:6 46.96794:84 47.03055:18 47.17379:10 51.02208:188 52.02962:465 53.03782:180 56.02606:74 56.06155:206 57.29388:20 57.45103:5 57.52541:68 57.85095:8 58.72386:9 58.99448:118 60.02957:54 60.97357:28 62.94527:150 63.9273:29 64.95956:32 65.03853:72 65.95612:13 66.02101:27 66.03464:74 67.5268:26 68.99…	5771.98	6451.67	4642	5882.56	4314.95	2849.87	6693.35	4538.41	3477.8	5453.81	3818.65	3812.99	7051.82	3753.54	1637.45	6018.85	3185.83	3031.47	3639.17	3596.39	6172.37	4239.02	6514.24	5028.6	6002.09	5978.91	6161.83	5680.11	1933.23	4382.49	3520.97	9086.12	3410.55	5650.3	4387.45	10116.7	3668.67	5884.55	8638.7	4829.62	8117.86	2393.86	3753.86	14007.3	12030.8
836	Unknown	0.667	23.54	42.00921:64 42.04593:21 42.99939:13 43.05369:119 43.37106:2 44.01281:12 44.97892:349 45.01496:415 45.21602:2 45.99338:57 46.26761:9 46.99401:423 47.04287:20 47.96519:9 47.99971:88 48.07526:9 51.02267:187 52.03013:292 52.61887:4 53.04069:19 54.01046:25 55.05357:346 55.24303:7 56.47102:3 58.0633:69 58.99448:24 60.00365:121 60.89891:5 62.94435:72 64.50896:25 64.9607:10 65.95931:63 66.99966:21 67.053…	2570.95	2545.04	1740.15	1104.9	2875.75	2280.41	1637.38	2362.86	1936.59	1820.45	1776.69	2469.85	2733.49	1962.9	1545.89	927.635	2797.94	2708.2	1743.13	2883.23	1417.64	1727.57	2331.97	2450.9	2550.07	1766.73	1825.72	1593.06	1290.25	1341.15	1540.71	1275.83	2088.01	2434.46	1818.78	1757.51	1501.66	633.382	1876.06	2473.67	1419.66	1684.87	1804.22	1654.14	1434.23
837	Unknown	0.733	111.32	41.03741:81 43.15579:7 44.0069:47 44.28479:11 44.97854:254 45.01533:657 45.98785:118 45.99622:12 46.05349:7 47.34212:6 49.0047:104 49.98984:155 51.02242:7 51.11206:3 51.68704:2 52.00473:38 52.0307:131 52.19324:5 52.98428:41 53.03863:135 53.33914:7 54.00859:145 54.98002:22 55.01767:117 55.05346:189 55.23597:6 55.26729:4 56.06288:41 57.28211:15 58.02844:304 58.99526:179 59.03089:175 59.06725:26 59.…	2822.84	2871.72	1857.63	1887.75	3707.6	2375.82	1983.79	2703.6	2428.2	2457.48	1962.81	2857.52	3293.75	3188.98	1666.54	1342.07	3250.47	2627.4	2768.01	3193.45	1107.42	1851.88	2824.93	3013.66	2624.35	2346.67	1875.45	1970.98	1843.55	1555.62	2554.57	2814.12	2631.63	3021.53	2825.42	1995.12	2090.08	574.061	2172.62	3191.63	1649.7	1824.72	2621.76	1924.66	1456.14
838	Spermidine	0.674	10.6	41.0261:118 41.03824:102 41.98956:22 42.04657:318 43.05359:216 43.14932:10 43.98916:477 45.01534:372 45.03454:1288 45.11553:11 45.20962:12 47.27724:9 47.99583:37 51.02324:330 52.01811:112 52.03065:40 53.17788:9 54.09694:9 54.80082:10 55.01762:145 55.05405:478 55.13532:14 55.24158:11 55.9818:11 56.01323:174 56.06314:457 58.02893:260 58.06474:54 59.03107:980 59.04125:96 59.10025:34 59.96687:50 60.0…	2968.34	6828.54	3602.23	2399.05	1238.38	1025.37	2884.68	3206.44	1712.41	3857.03	2397.56	693.648	2376.56	1167.51	440.964	2209.18	627.117	756.425	1229.9	773.075	1367.28	968.545	4150.05	2770.95	1776.6	1824.56	1537.59	1370.99	806.767	799.649	634.556	8179.74	3215.29	6679.65	2524.56	6419.11	1653.81	9579.55	7644.33	3527	4382.07	649.294	2028.08	3024.72	3736.06
839	Unknown	0.363	11.94	41.18443:8 42.04601:185 43.0179:439 43.05342:180 43.68582:24 44.02547:204 44.97908:306 45.26289:12 46.99443:98 47.80714:4 48.32501:9 50.78891:5 51.02219:322 52.02978:449 53.03597:105 54.03287:89 55.01732:333 57.6816:3 58.06544:34 58.35911:4 59.03662:86 59.23417:12 60.12116:3 62.94437:77 63.022:43 63.37276:4 64.15308:5 64.52799:38 64.96043:90 65.24284:9 65.52902:66 66.13926:12 67.02012:75 67.05366…	2008.31	5718.46	2454.45	1820.12	1702.63	805.959	1847.08	2437.08	1580.99	2763.23	2087.48	889.794	2343.75	875.506	519.942	2458.66	943.552	781.611	1111.05	1138.13	1093.29	1115.2	3273.95	2246	1362.65	1578.07	1185.12	1266.64	633.976	635.936	593.738	4075.84	1487.93	4140.1	1866.25	3995.97	753.31	6824.88	4533.93	1977.27	1847.02	792.607	1155.08	1844.23	2737.75
842	Unknown	0.889	30.68	41.31301:8 42.03342:112 42.04588:74 42.99906:222 43.05435:460 43.40032:6 43.98886:686 44.05692:36 44.0994:14 44.2147:28 44.97862:138 45.23964:6 45.99543:221 46.99412:20 47.08783:17 49.00677:140 50.0149:176 50.26123:3 53.03859:118 53.99218:29 54.04539:113 55.68362:4 56.02603:164 56.0629:31 56.33675:4 57.32047:5 57.47175:10 58.02287:174 58.07182:184 58.53992:4 59.91087:12 59.94632:8 62.94206:11 63.…	1657.57	3501.53	1490.09	1232.11	685.089	467.917	1611	773.039	671.016	1900.27	821.457	1323.14	3009.96	1204.57	582.531	3289.59	884.545	755.319	1710.72	1341.83	3597.28	3324.46	2037.43	2207.67	2638.49	2213.3	2397.72	2421.08	259.494	1193.9	842.027	4051.88	1210.2	3955.98	716.03	4236.36	513.592	2145.24	3342.01	1056.39	4750.03	1359.98	861.194	4481.03	5489.66
843	Unknown	0.911	14.93	41.23553:4 42.03333:386 42.99939:542 43.98899:370 44.00818:24 44.10978:8 44.28323:4 45.09141:7 45.55587:8 46.99504:430 47.03807:30 47.11047:13 47.19412:5 50.05924:12 50.11365:4 52.03016:269 52.98546:64 53.16711:4 53.23053:7 56.13173:5 58.0278:464 58.99297:160 59.03068:674 59.06832:93 59.19593:7 60.03291:120 61.00928:201 61.75982:8 62.81805:5 63.02197:68 64.018:30 65.01517:116 65.95812:59 66.32474…	3888.89	8956	3817.32	3849.27	3060.67	3071.49	3751.01	2686.41	3219.98	4168.02	2394.98	3758.02	9271.7	5302.76	2950.43	10847.6	3223.64	4359	4517.19	4841.4	4846.68	4902.23	5386.08	4219.73	8296.06	6628.44	6414.81	6179.69	1056.87	5139.78	2916.61	6716.7	3094.25	9438.03	2860.98	5996.86	1736.99	6401.37	4166.45	4178.7	9507.81	3577.02	3755.07	10919	10865.3
847	DL-Cystathionine	0.556	175.2	42.99922:196 43.98904:1579 44.00694:416 44.97891:1476 45.0146:1023 45.99623:294 46.99444:868 49.00746:180 51.0225:233 53.00236:70 53.03794:150 54.04582:283 55.01799:152 55.05358:512 56.00845:580 56.04929:713 58.99398:186 60.00241:494 60.03076:191 61.01019:546 62.01488:159 63.0228:61 67.0167:92 67.05416:318 68.00928:53 68.05681:162 69.03159:176 69.06895:337 69.99718:93 71.98661:111 72.03844:105 73…	441.369	722.519	479.037	804.291	641.223	273.68	535.684	423.877	739.386	334.415	432.236	9921.32	81077.5	14796	2304.22	128108	4364.8	3695.82	21846	10516.8	88836.6	36075.5	996.21	926.55	52670.1	49943.7	47309.8	42999.7	444.226	14541	4122.38	1057.14	491.81	705.528	497.815	1403.61	404.729	3401.88	1077.65	541.815	148855	7616.11	589.33	147120	185068
851	Glucose-6-phosphate	0.43	17.55	42.04243:40 43.05419:166 43.21923:11 43.90188:11 44.20466:32 44.6156:11 44.69803:12 44.7974:4 44.97885:398 45.01569:699 45.02363:77 45.97731:61 46.99453:540 48.32196:8 48.9909:51 50.02854:53 50.75241:6 52.03049:181 53.02553:80 53.15167:37 54.12763:6 55.01763:49 55.2561:8 55.99377:167 56.14026:5 56.68655:2 58.02407:452 58.07388:61 58.9942:106 59.03101:542 59.04893:41 59.93972:2 60.00306:247 60.030…	2769.84	2988.25	2440.23	544.83	910.823	589.502	1373.03	480.543	266.575	4422.91	668.5	799.101	1360.42	672.056	259.791	1770.55	488.751	471.375	848.607	582.412	1696.13	807.64	1938.03	1713.95	1057.84	955.07	847.302	893.464	111.097	661.164	471.063	1201.98	2390.55	1086.38	806.136	3668.36	249.12	1248.91	2807.07	2169.69	1875.93	618.199	332.025	2079.95	2006.34
852	Unknown	0.356	9.51	41.03764:28 42.1152:6 43.01692:446 43.05386:285 43.29736:5 43.81489:8 43.98879:28 44.09933:15 44.28658:17 44.65412:5 45.33116:8 45.99624:177 47.78678:11 47.99298:20 50.01564:30 52.92784:35 53.02752:186 53.03836:45 54.03198:16 55.01785:10 55.05356:25 55.81636:5 56.06169:80 57.21893:13 57.78801:7 58.028:155 59.03056:186 59.309:7 60.03614:96 62.9452:103 63.50919:48 63.96071:76 65.03751:30 66.51846:4…	1813.46	8309.16	1514.42	1295.09	2637.73	2423.24	2360.07	1461.47	1459.42	2488.1	1923	943.856	2732.59	998.675	560.202	1702.68	758.572	932.026	1092.09	1109.5	2021.2	1144.82	3782.82	3283.96	1749.06	1555.88	1583.69	1754.79	736.189	928.26	701.59	6204.32	2147.64	5788.91	2341.11	7443.41	705.099	7023.17	9081.19	2793.63	2580.34	698.271	1517.91	2744.91	3980.83
854	Unknown	0.874	26.92	40.02971:25 41.03814:540 41.1161:10 42.04612:181 42.99887:417 43.0539:342 43.10865:6 43.77824:4 44.05574:56 44.11089:11 44.14395:19 45.01542:421 45.06618:13 45.27626:10 45.66498:6 45.98693:50 46.01518:66 46.24802:6 46.99467:345 48.98978:55 50.70586:4 51.02264:125 52.02982:274 52.20716:3 53.03788:37 53.97895:31 54.04623:306 55.01763:170 55.05341:270 55.17084:15 55.27895:18 56.02527:272 56.06147:10…	3337.39	10778.1	3464.19	3361.23	2827.92	2186.95	3487.22	2392.11	3152.85	4769.68	2425.68	3378.23	9032.32	4478.35	2640.99	11888.5	2854.36	3099.36	4725.82	4524.98	5992.22	4785.19	5448.45	3870.91	6555.27	8081.41	5334.74	6070.79	823.321	4468.56	2955.2	5774.67	2728.71	9218.41	3068	5681.08	1390.73	5890.48	5649.68	2873.56	9172.84	2999.06	2435.94	12598.4	13306.5
856	D-Sorbitol 6-phosphate; GC-EI-TOF; MS; n TMS; RT	0.333	24.85	41.00287:61 41.03809:192 41.99136:61 42.03174:116 42.16492:3 43.0537:1090 43.3585:7 44.02465:41 44.09705:24 44.17322:32 44.21829:4 44.27141:9 44.56204:17 44.86594:16 44.9787:259 45.01519:519 45.88712:3 46.01461:70 46.99449:86 47.99289:147 49.9617:42 51.02224:59 52.0304:430 52.98333:22 53.03882:176 53.53234:7 54.20458:3 54.99946:230 55.0534:84 55.41049:6 56.17465:10 57.10029:17 57.16333:10 57.2341…	1588.23	4925.35	1541.72	763.179	300.051	453.483	2063.69	954.539	449.095	1902.2	564.937	735.291	7053.67	1189.38	315.524	3278.76	454.046	555.691	1327.59	1134.96	5289.08	3147.42	2382.1	2032.51	2879.18	2976.92	2340.68	2422.59	133.061	1343.59	501.703	3011.41	999.776	2891.38	359.259	9769.58	186.351	5861.85	3208.81	737.439	8929.53	1410.33	619.911	11738.3	10805
857	D-Sorbitol 6-phosphate	0.6	31.48	41.03915:189 41.06472:12 43.0542:1422 43.98913:5558 44.0066:37 44.05803:183 44.58777:18 44.71298:34 44.97892:201 45.01542:2393 45.22873:14 45.28091:12 46.01415:1467 46.57206:12 46.99443:918 48.00048:157 48.07528:43 48.98974:71 49.18191:11 50.01496:149 51.12316:17 51.47372:19 53.03459:207 53.14822:11 53.97812:27 55.05446:1183 55.08219:19 56.01236:131 56.02496:363 56.06193:733 57.0972:47 57.19431:1…	1583.41	4925.23	1570.3	763.171	300.039	453.702	2065.19	955.029	449.09	1902.14	565.111	735.274	7055.36	1189.83	315.67	3278.66	454.116	555.819	1327.57	1134.93	5291.62	3146.21	2383.34	2033.2	2880.26	2978.47	2341.64	2422.92	133.171	1344.72	501.969	3014.03	1000.47	2892.31	359.263	9770.23	186.512	5847.6	3190.91	738.081	8936.77	1410.52	620.373	11741.2	10810.1
862	Unknown	0.326	24.87	40.9755:16 42.04597:9 43.01817:117 43.98926:3639 44.13485:7 44.2432:21 44.97864:124 45.0151:114 45.03297:28 45.09985:21 45.24826:10 45.52729:59 45.55579:14 45.76497:19 46.01458:203 47.99952:131 49.00089:21 51.02257:249 51.41108:6 52.15023:10 52.21457:5 53.00239:13 53.02463:111 53.98309:54 54.04599:305 54.09204:23 55.05388:222 55.5867:8 55.9954:114 57.20592:19 57.27582:4 57.32016:5 59.03069:69 59.…	1620.93	3287.04	1827.31	843.656	1450.69	713.561	2162.24	1476.3	505.901	3080.11	1154.64	437.839	989.143	327.937	248.365	681.038	373.181	278.567	392.761	466.389	987.524	595.508	2924.43	2440.48	831.367	509.127	575.503	509.506	204.297	305.134	375.023	3036.75	1489.84	2800.59	1114.3	3913.91	508.734	550.375	4435.36	1386.51	943.779	328.593	775.143	817.094	1182.09
864	Unknown	0.511	20.43	40.02965:43 41.32039:5 42.04642:28 43.29637:3 43.98886:1128 44.05766:19 44.09522:21 44.21017:12 44.9791:100 45.01479:284 45.44012:7 45.98689:142 46.0592:9 46.99363:196 47.07896:11 47.71632:3 48.07541:7 48.9912:137 49.40223:4 50.01572:113 50.2403:8 50.3083:4 51.02246:250 52.03061:428 54.04614:44 55.01755:484 55.0549:192 55.5236:14 56.01298:131 56.06252:124 58.07285:30 58.34728:15 58.99411:29 59.03…	2162.89	2791.35	2306.45	1349.07	1856.21	1557.26	1512.45	1757.87	487.03	1501.97	1428.82	573.081	928.574	737.289	317.731	1140.23	555.852	444.137	463.106	432.083	673.747	761.786	2684.64	2271.55	589.59	835.466	817.343	575.546	438.901	328.89	490.361	1766.99	1746.69	3437.45	1854.53	3490.2	820.37	1358.66	4445.22	2686.84	880.02	640.549	1203.87	1659.79	1770.35
869	Unknown	0.267	8.16	42.04148:35 43.01784:251 43.98913:1017 44.04845:42 44.55929:5 44.62121:12 44.65049:2 45.53626:5 45.67987:31 46.01618:86 47.18415:7 47.96504:35 47.99392:53 49.96241:8 50.01444:435 53.02608:389 53.2502:5 53.35436:14 53.44564:5 53.69093:5 55.76199:2 56.43575:3 57.51255:6 58.02852:287 58.8872:3 58.99397:55 59.03069:111 59.18317:4 60.81342:5 60.95565:41 61.01013:113 61.2942:12 62.9474:21 64.52686:41 6…	80.4281	148.843	62.7018	48.7985	95.7619	22.5507	107.742	122.629	57.7905	115.096	72.296	690.515	1910.92	980.699	232.689	3045.38	528.227	330.902	987.548	881.813	2751.91	1142	147.334	167.695	1883.35	1730.7	1333.2	925.46	69.2416	484.746	324.086	93.5794	104.171	100.378	164.352	85.578	74.9011	93.4593	75.1413	117.763	3578.89	602.746	369.468	3484.31	3985.91
877	Unknown	0.37	14.1	42.99991:99 43.98882:1041 44.00757:170 44.10184:35 44.1896:20 44.30685:6 45.01512:1248 45.09749:35 45.42536:9 45.68824:9 45.99401:322 46.99399:39 47.51525:34 47.96623:152 47.99474:137 48.27963:8 48.74033:3 50.01403:404 50.13348:6 51.02256:448 51.71429:6 51.97689:35 52.02404:242 52.20506:8 52.90582:9 54.04424:35 54.68815:12 55.23651:8 55.35263:7 56.06228:265 56.24192:33 57.22803:39 57.85484:10 57.…	53.8239	117.581	30.309	55.5985	28.1621	33.8664	29.5981	40.9896	25.4038	72.9333	12.1215	1361.04	1560.7	1343.76	1238.3	1556.45	1014.21	1437.31	1270.85	1781.69	1192.17	1127.23	121.942	128.33	1404.11	1332.5	1441.1	1479.76	962.412	958.424	1229.78	47.2135	27.8219	48.6466	70.0967	36.7402	34.7051	77.1573	62.383	51.8485	1192.7	1282.56	663.376	2052.31	1974.07
880	Unknown	0.541	19.7	40.02619:101 40.33065:2 41.18773:5 42.9992:382 43.14782:2 43.70025:2 43.98878:473 44.00738:77 44.05758:10 44.0896:19 44.16983:31 44.71598:10 44.79412:9 45.14513:5 45.21582:6 45.73576:2 45.98591:50 46.28915:2 47.06754:24 47.16924:4 47.96675:102 48.10492:2 53.03842:137 53.40774:5 54.04408:106 55.01658:122 55.05334:379 55.99947:141 56.04907:84 57.52574:38 57.98641:30 58.029:246 58.07184:41 58.75107:…	838.241	2626.55	1224.42	7746.4	882.593	1258.74	1433.03	1563.41	3407.99	2659.15	1512.67	2154.4	4327.19	9855.55	3757.65	3335.48	2467.1	1693.34	8377.56	7677.9	3557.05	2827.07	2659.82	2963.95	5012.11	4271.35	4046.87	3341.22	1574.72	2324.69	1633.18	2625.52	1388.73	2077.26	2294.43	2162.12	3013.28	6967.87	4817.21	1355.92	4018.77	2328.97	1851.2	4346.99	4584.22
894	D-(+)-Trehalose; GC-EI-TOF; MS; 8 TMS; BP	0.156	282.88	42.99947:146 44.00689:208 44.97864:122 45.01464:657 46.01471:271 46.99441:231 48.99107:170 51.99677:111 52.03038:69 52.98414:105 53.03699:127 54.03388:84 54.9985:85 55.01836:315 55.0533:166 56.02545:107 59.03095:335 62.01529:197 63.02045:389 66.02058:165 66.9567:48 66.99287:58 67.01804:54 68.00831:43 69.03284:706 70.07645:41 72.03801:275 72.07321:45 73.1854:125 73.21193:110 73.24405:92 73.30817:7…	35698.9	24014.8	40123.2	378.326	11626.6	4436.74	21604.9	759.496	458.243	34296.9	1030.19	1278.03	4373.21	830.983	554.682	3308.86	742.694	664.098	1615.99	1103.19	2391.75	1383.74	24181.7	21436.7	2161.49	1901.31	2043.38	1706.48	297.165	821.334	407.756	15987.7	15438.6	22233.9	5929.55	109622	312.184	728.562	2484.07	23797.5	3305.7	755.342	493.505	3871.44	4971.63
895	D-(+)-Trehalose	0.548	153.45	42.0088:38 42.04606:79 43.05396:129 44.05764:134 44.07664:66 44.1806:37 44.22665:49 44.34241:38 44.84286:61 44.97886:1411 45.01516:2049 46.01408:55 46.99458:1041 47.0119:112 47.02048:33 48.05512:59 48.75065:35 51.02217:135 52.06973:61 52.98471:204 53.03669:471 54.5034:64 56.06119:342 56.08783:38 58.07324:171 58.99306:210 62.01284:272 62.94759:164 62.98819:65 63.02174:418 63.9274:169 65.52893:55 6…	35805.4	24037.9	40440.9	380.334	11704.6	4451.44	21743.1	763.106	459.137	34613.2	1035.48	1283.29	4382.81	835.271	556.582	3329.44	732.243	663.471	1624.14	1110.42	2404.13	1385.29	24328.2	21414.6	2163.67	1780.23	2058.82	1673.39	301.581	816.797	402.79	15951.8	15266	22076	5889.87	109562	311.622	730.801	2446.04	23683.8	3276.43	752.357	490.84	3861.62	4955.55
897	Unknown	0.793	13.36	41.80772:5 42.04691:52 42.2166:9 42.99887:361 43.05409:144 43.28416:7 44.02514:261 44.0586:188 44.1712:56 44.25424:23 44.51005:9 44.97879:585 45.01497:1183 45.07464:20 45.22788:17 45.98774:127 47.32315:7 49.00694:123 50.01476:603 50.41699:6 51.13612:14 52.08551:6 54.03307:256 55.99443:198 56.06146:556 57.2237:8 57.34298:32 57.98594:170 58.07089:115 58.41782:5 58.99386:302 59.03099:1338 59.63807:6…	4642.12	9118.09	3545.3	4957.24	4569.45	3333.12	4954.72	4348.77	5123.86	7449.02	4659.37	5085.24	12448	6056.82	3259.76	10072.2	7782.43	5645.87	7054.78	6853.07	9418.85	6679.08	6167.05	6094.99	9903.56	9179.25	8264.33	6394	1349.78	4723.92	5485.66	8038.37	4433.47	7926.91	4002.6	11529.3	3322.2	4343.15	8148.39	5893.36	12579.2	5973.55	5085.27	14743.1	16444.9
898	Unknown	0.6	18.53	41.03879:230 42.04593:27 42.99958:269 43.05368:65 43.47894:5 44.05119:12 44.09368:24 45.01461:243 45.07734:1 45.11369:12 45.4147:4 45.49275:8 45.82299:7 46.11542:5 46.99406:274 47.22127:22 47.65122:6 48.99062:114 49.00748:186 50.70106:2 51.02226:313 51.11916:15 51.19744:10 51.95091:5 52.16044:6 52.20867:7 52.31823:5 52.9201:3 53.01055:8 53.03826:58 54.00955:36 54.04692:185 55.01732:278 55.05364:2…	1845.8	3477.83	1320.99	509.467	622.198	864.368	1464.41	1072.92	584.098	1738.4	679.504	512.877	1414.95	547.181	306.846	978.752	460.851	365.98	756.168	548.873	1082	661.363	1534.55	1397.13	1112.13	928.715	909.297	719.248	262.4	683.718	298.604	2281.55	1493.33	3907.27	1072.85	2391.76	338.362	1338.89	2098.47	1083.26	2056.71	380.68	746.125	1673.04	1688.87
911	Unknown	0.815	51.09	41.03827:128 41.0684:38 41.36939:5 42.00914:121 42.04631:253 42.17783:4 42.99884:241 43.67064:9 43.98879:1749 44.00008:303 44.00753:161 44.06053:37 44.13378:33 44.16803:38 44.4428:7 44.66542:29 44.82347:12 45.01504:1060 45.08772:13 45.2864:7 45.32202:10 45.99382:137 47.06281:10 47.57722:3 48.69474:6 49.52491:40 51.02222:501 51.07341:18 51.59555:5 52.23836:19 52.98391:157 54.99906:105 56.06123:246…	17836.3	41157.4	19373.6	27872.4	12058.5	11731.4	21025	16579.4	17750.8	28126.5	18168.2	15742	40341	22433.4	9470.55	36621.6	17029.1	11876.9	30261.4	26903.8	34334.7	25768.2	29253.7	22847.5	30460.2	30723.2	27789.5	22440.6	3047.87	16419.9	14132.9	33076.5	16676.5	42196.6	22479	49693.7	7026.84	45211.9	35015.1	28707.8	40465.8	19872	16299.7	46481.8	41709.7
912	Adenosine 5'-diphosphate	0.859	142.01	41.03979:200 41.99238:75 43.05343:200 43.98894:383 44.00745:436 44.97863:364 45.01552:2416 45.97852:497 46.01716:454 46.99491:122 47.05497:137 47.06554:54 50.01522:571 50.04762:63 51.02272:489 52.03064:1130 52.98421:208 53.03898:835 55.01734:742 57.98551:65 58.02294:187 58.99535:271 59.03108:1622 59.05353:64 60.0028:101 61.01:857 62.94548:119 63.02328:144 63.96016:301 64.02949:120 65.03841:220 66…	17901	43719.8	18284.2	27588.4	10050.4	11652.5	19913.8	15972.3	18100.4	25973.9	17627	15149.9	39270	21111.6	9576.19	35939	15662.8	11007.8	30105.2	27646.9	34191.9	25692.3	29864.9	23605.5	31085.6	30178.8	27443.4	23267.9	2590.99	16714.9	13362.3	34537.4	15901.4	42889	23070.3	56378	7419.67	50164.5	33924.3	29054	42952.9	20875	16138.2	52847	42746.1
913	Unknown	0.548	26.17	40.0293:58 40.84372:9 42.99942:186 43.05445:80 44.00708:374 44.04942:133 44.12001:38 44.23783:6 44.43759:16 44.97912:358 45.08388:43 45.11878:40 45.3899:12 45.53724:15 45.79211:6 46.99474:287 49.00542:21 50.0146:389 50.2844:16 51.65441:7 51.71316:3 52.9848:106 53.01194:153 53.03761:180 54.04508:232 54.97789:68 56.02529:224 56.06174:318 56.22506:7 57.29966:6 58.02918:154 58.06323:81 58.23922:9 59.…	6450.45	14670	7439.33	9252.57	4906.75	4907.11	8270.74	6401.85	6522.18	10013.1	7022.82	6687.31	14481.7	8046.72	4343.12	13657.4	6704.3	5005.17	10857.9	10360.7	12169.9	9428.51	11098.7	8439.29	12261.1	11698.5	9604.85	8074.76	1731.21	7016.25	5176.74	10797.2	6098.51	14433.1	7943.26	18586.1	2835.49	15166.1	12580.9	10157.2	14720.7	7466.65	6368.32	16152.4	14490.2
914	Unknown	0.452	12.67	40.35846:7 40.55242:3 42.99988:24 43.08403:3 43.98894:88 44.10631:5 44.20658:1 44.24044:7 44.39501:13 44.75519:8 44.97844:111 45.015:276 45.10537:10 45.1594:11 45.22145:5 45.46156:6 46.99462:351 47.26308:5 47.45069:8 50.17696:5 51.02267:136 51.43095:6 51.97666:9 52.59915:4 52.9834:66 53.20907:2 53.98099:86 54.0076:42 54.04678:4 54.17099:3 55.01716:101 55.054:235 55.26008:5 55.9942:22 56.15368:5 5…	4719.75	11071.2	4919.76	7506.29	2602.31	3030.68	5353.12	4392.03	4698.78	6970.85	5077.43	3974.92	10536.6	5825.31	2827.91	9164.04	4457.2	2811.72	7830.05	7557.72	9208.75	6867.54	7764.28	6324.74	8795.65	8811.27	7643.85	6534.49	890.257	4429.52	3404.55	9030.45	4085.86	11876.7	6179.16	13999.8	2165.12	13163	8981.93	8446.25	11111.6	5713.13	4669.52	14801.4	11569.8
[truncated: 60 more columns]
